# Supplementary material for: Neosuberitenone, a New Sesterterpenoid Carbon Skeleton; New Suberitenones; and Bioactivity against Respiratory Syncytial Virus, from the Antarctic Sponge Suberites sp.
Source: MDPI journal article supplement (doi:10.3390/md21020107), 2023-02-01
Supplement: s1 [file s1]

# Neosuberitenone, a New Sesterterpenoid Carbon Skeleton, New Suberitenones, and Bioactivity against Respiratory Syncytial Virus, from the Antarctic sponge *Suberites* sp.

Joe Bracegirdle <sup>1</sup>, Stine S. H. Olsen <sup>1</sup>, Michael N. Teng <sup>2</sup>, Kim C. Tran <sup>2</sup>, Charles D. Amsler <sup>3</sup>, James B. McClintock <sup>3</sup> and Bill. J. Baker <sup>1,\*</sup>

<sup>1</sup> Department of Chemistry, University of South Florida, 4202 E. Fowler Avenue, CHE205, Tampa, FL 33620, USA

<sup>2</sup> Department of Internal Medicine, University of South Florida, Tampa, FL 33612, USA

<sup>3</sup> Department of Biology, University of Alabama at Birmingham, 1300 University Blvd, Birmingham, AL 35233, USA

\* Correspondence: bjbaker@usf.edu; Tel.: +1 (813) 974-1967

## Table of Contents

|                                                                                    |    |
|------------------------------------------------------------------------------------|----|
| <b>Table S1.</b> NMR data for neosuberitenone A (1).....                           | 2  |
| <b>Figure S1 – S7.</b> NMR spectra and MS data for 1.....                          | 3  |
| <b>Table S2.</b> NMR data for suberitenone E (2).....                              | 8  |
| <b>Figure S8 – S14.</b> NMR spectra and MS data for 2.....                         | 9  |
| <b>Table S3.</b> NMR data for suberitenone F (3).....                              | 14 |
| <b>Figure S15 – S21.</b> NMR spectra and MS data for 3.....                        | 15 |
| <b>Table S4.</b> NMR data for suberitenone G (4).....                              | 20 |
| <b>Figure S22 – S28.</b> NMR spectra and MS data for 4.....                        | 21 |
| <b>Table S5.</b> NMR data for suberitenone H (5).....                              | 26 |
| <b>Figure S29 – S35.</b> NMR spectra and MS data for 5.....                        | 27 |
| <b>Table S6.</b> NMR data for suberitenone I (6).....                              | 32 |
| <b>Table S7.</b> NMR data for suberitenone J (7).....                              | 33 |
| <b>Figure S36 – S44.</b> NMR spectra and MS data for 6 and 7.....                  | 34 |
| <b>Table S8.</b> NMR data for secosuberitenone A (8).....                          | 41 |
| <b>Figure S45 – S51.</b> NMR spectra and MS data for 8.....                        | 42 |
| <b>Table S9.</b> NMR data for norsuberitenone A (9).....                           | 47 |
| <b>Figure S52 – S58.</b> NMR spectra and MS data for 9.....                        | 48 |
| <b>Table S10.</b> Crystal data for neosuberitenone A (1).....                      | 53 |
| <b>Table S11.</b> Crystal data for suberitenone E (2).....                         | 54 |
| <b>Figure S59.</b> Ellipsoid plot of neosuberitenone A (1).....                    | 55 |
| <b>Figure S60.</b> Ellipsoid plot of suberitenone E (2).....                       | 55 |
| <b>Figure S61.</b> Antiviral activity and cytotoxicity of selected compounds ..... | 56 |
| <b>Table S12.</b> Antiviral activity against RSV.....                              | 56 |

Table S1 – NMR data for neosuberitenone A (**1**) (500 ( $^1\text{H}$ ) and 125 ( $^{13}\text{C}$ ) MHz,  $\text{CDCl}_3$ ).

| pos        | $\delta_{\text{C}}$ , type | $\delta_{\text{H}}$  | gCOSY            | gHMBC              | NOESY           |
|------------|----------------------------|----------------------|------------------|--------------------|-----------------|
| <b>1</b>   | 67.5, CH                   | 4.18, dd (3.5, 8.7)  | 2, 2', 6         | 7                  | 5               |
| <b>2</b>   | 42.9, $\text{CH}_2$        | 2.13, o/l            | 1, 2'            | 3, 4, 8            |                 |
| <b>2'</b>  |                            | 1.64, o/l            | 1, 2             | 1, 3, 4, 8, 21     | 8               |
| <b>3</b>   | 48.7, C                    |                      |                  |                    |                 |
| <b>4</b>   | 214.3, C                   |                      |                  |                    |                 |
| <b>5</b>   | 41.9, $\text{CH}_2$        | 2.25, d (18.6)       | 5', 6            | 1, 4, 6, 7         | 1               |
| <b>5'</b>  |                            | 2.10, o/l            | 5, 6             | 1, 6, 7            |                 |
| <b>6</b>   | 44.1, CH                   | 2.69, o/l            | 1, 5, 5'         | 1, 2, 4, 7, 8, 22  |                 |
| <b>7</b>   | 134.3, C                   |                      |                  |                    |                 |
| <b>8</b>   | 40.8, CH                   | 2.68, o/l            | 9, 9', 22        | 2, 3, 4, 22        | 2'              |
| <b>9</b>   | 21.5, $\text{CH}_2$        | 1.75, m              | 8, 9', 10        | 7, 8, 10, 15       |                 |
| <b>9'</b>  |                            | 1.26, o/l            | 8, 9, 10         | 3, 8, 11           |                 |
| <b>10</b>  | 55.1, CH                   | 1.02, o/l            | 9, 9'            | 9, 11, 23, 24      | 12', 22         |
| <b>11</b>  | 35.7, C                    |                      |                  |                    |                 |
| <b>12</b>  | 45.5, $\text{CH}_2$        | 2.09, o/l            | 12', 13          | 10, 11, 13, 14, 23 | 22, 23          |
| <b>12'</b> |                            | 1.44, dd (3.7, 15.1) | 12, 13           | 11, 22, 23         | 10, 14, 22      |
| <b>13</b>  | 70.8, CH                   | 5.51, br q (2.5)     | 12, 12', 14      |                    | 20              |
| <b>14</b>  | 57.1, CH                   | 1.04, o/l            | 13               | 15, 19, 24, 25     | 12', 20         |
| <b>15</b>  | 38.2, C                    |                      |                  |                    |                 |
| <b>16</b>  | 41.7, $\text{CH}_2$        | 1.55, br d (13)      | 16', 17, 17'     |                    |                 |
| <b>16'</b> |                            | 0.82, td (13.1, 3.1) | 16, 17, 17'      | 10, 15, 17, 24     |                 |
| <b>17</b>  | 18.4, $\text{CH}_2$        | 1.66, o/l            | 16, 17', 18, 18' |                    | 25              |
| <b>17'</b> |                            | 1.41, o/l            | 16, 16', 17      |                    |                 |
| <b>18</b>  | 44.2, CH                   | 1.35, br d (13.1)    | 17, 18'          |                    | 20, 25          |
| <b>18'</b> |                            | 1.14, o/l            | 17', 18          | 17, 25             |                 |
| <b>19</b>  | 34.0, C                    |                      |                  |                    |                 |
| <b>20</b>  | 33.2, $\text{CH}_3$        | 0.92, s              |                  | 14, 18, 19, 25     | 13, 14, 18      |
| <b>21</b>  | 16.4, $\text{CH}_3$        | 1.01, s              |                  | 2, 3, 4, 8         |                 |
| <b>22</b>  | 140.0, CH                  | 5.60, d (3.1)        | 8                | 6, 8, 11, 12       | 10, 12, 12', 23 |
| <b>23</b>  | 19.6, $\text{CH}_3$        | 1.18, s              |                  | 10, 11, 12, 22     | 12, 22, 24, 27  |
| <b>24</b>  | 16.1, $\text{CH}_3$        | 1.28, s              |                  | 10, 14, 15, 16     | 23, 25, 27      |
| <b>25</b>  | 23.2, $\text{CH}_3$        | 1.01, s              |                  | 14, 18, 19, 20     | 17, 18, 24, 27  |
| <b>26</b>  | 170.6, C                   |                      |                  |                    |                 |
| <b>27</b>  | 22.0, $\text{CH}_3$        | 2.06, s              |                  | 26                 | 23, 24, 25      |

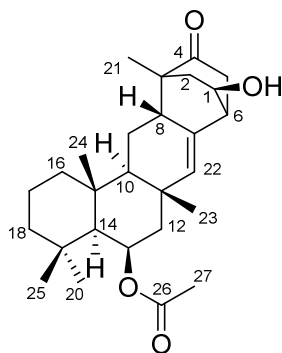

Figure S1 –  $^1\text{H}$  NMR spectrum (500 MHz,  $\text{CDCl}_3$ ) of **1**

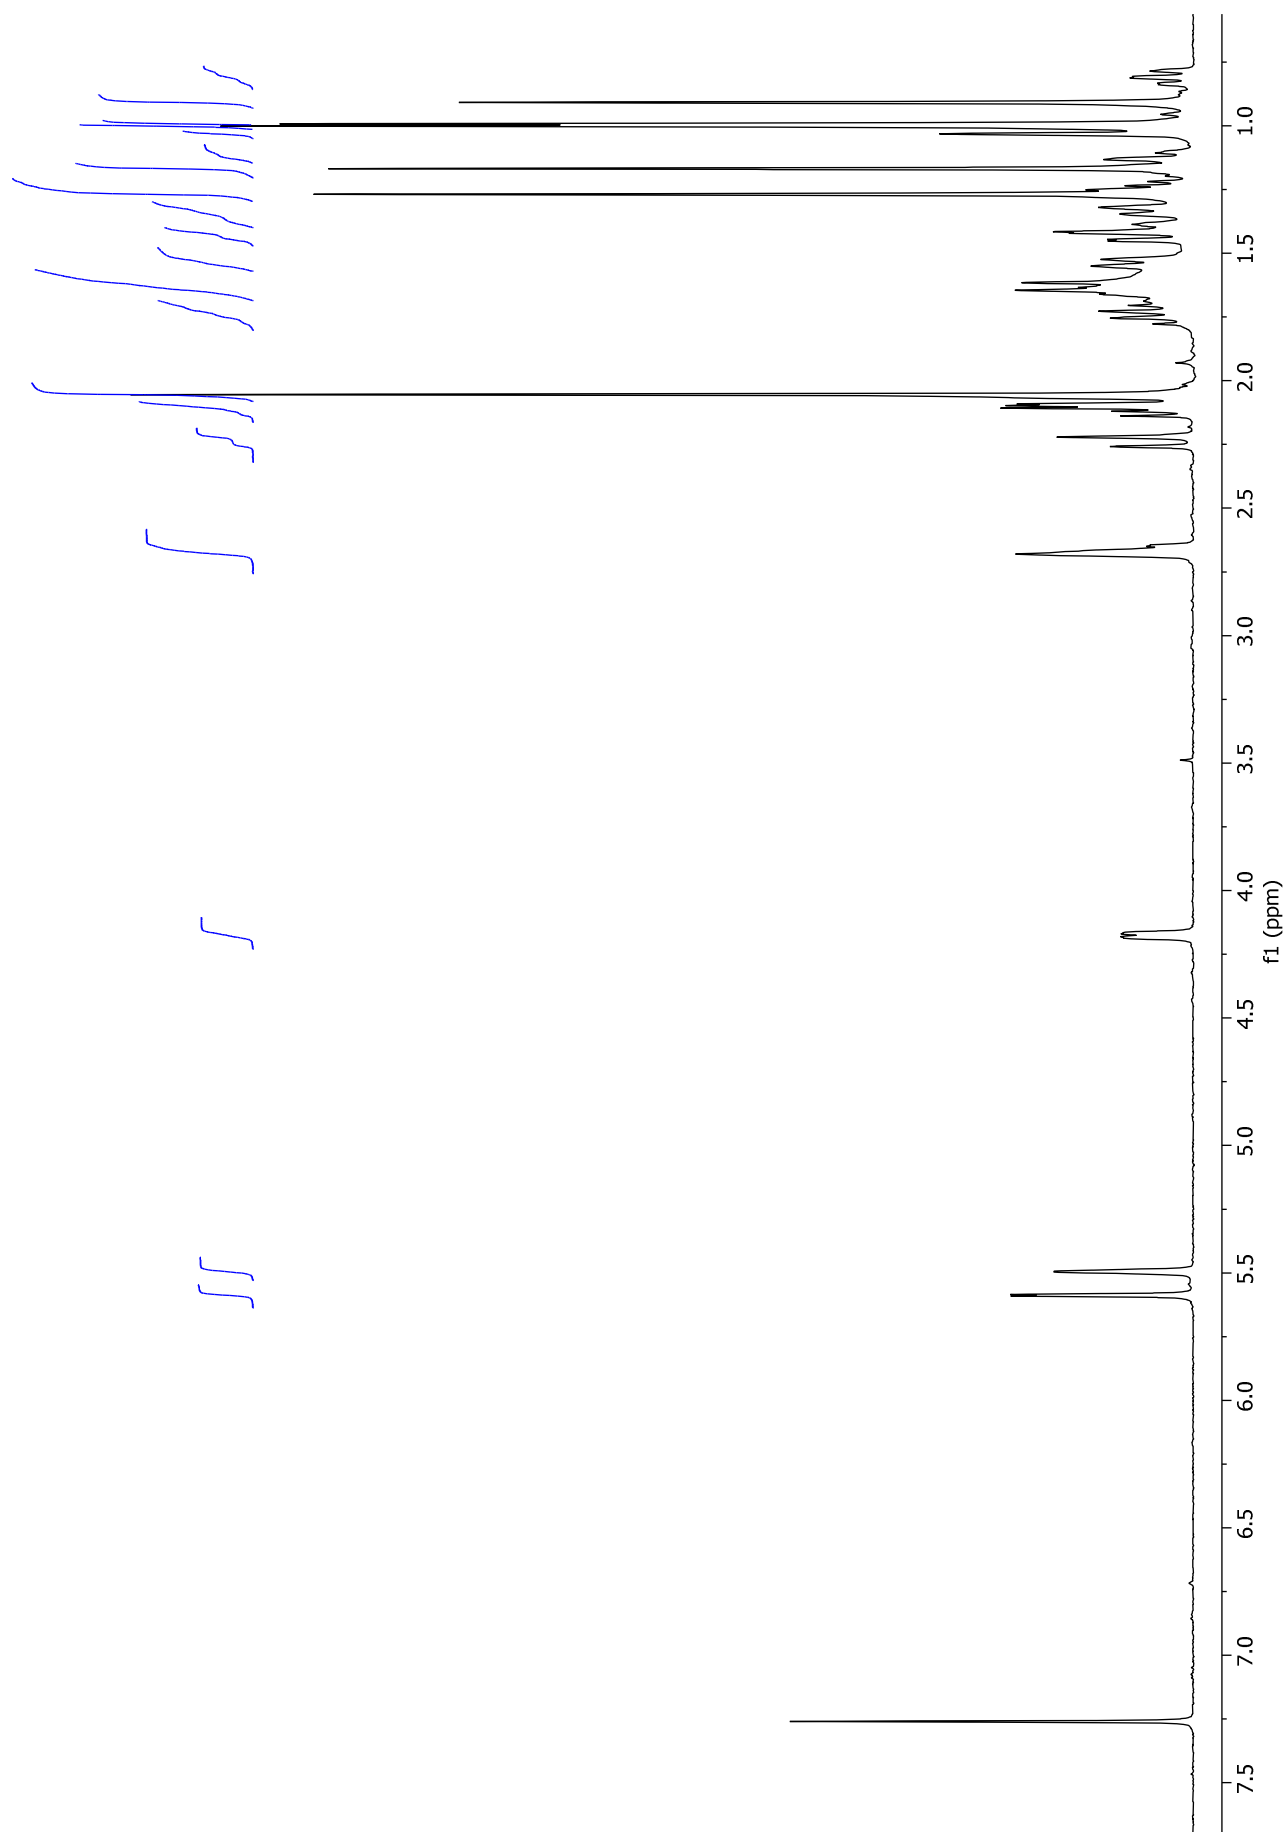

Figure S2 –  $^{13}\text{C}$  NMR spectrum (125 MHz,  $\text{CDCl}_3$ ) of **1**

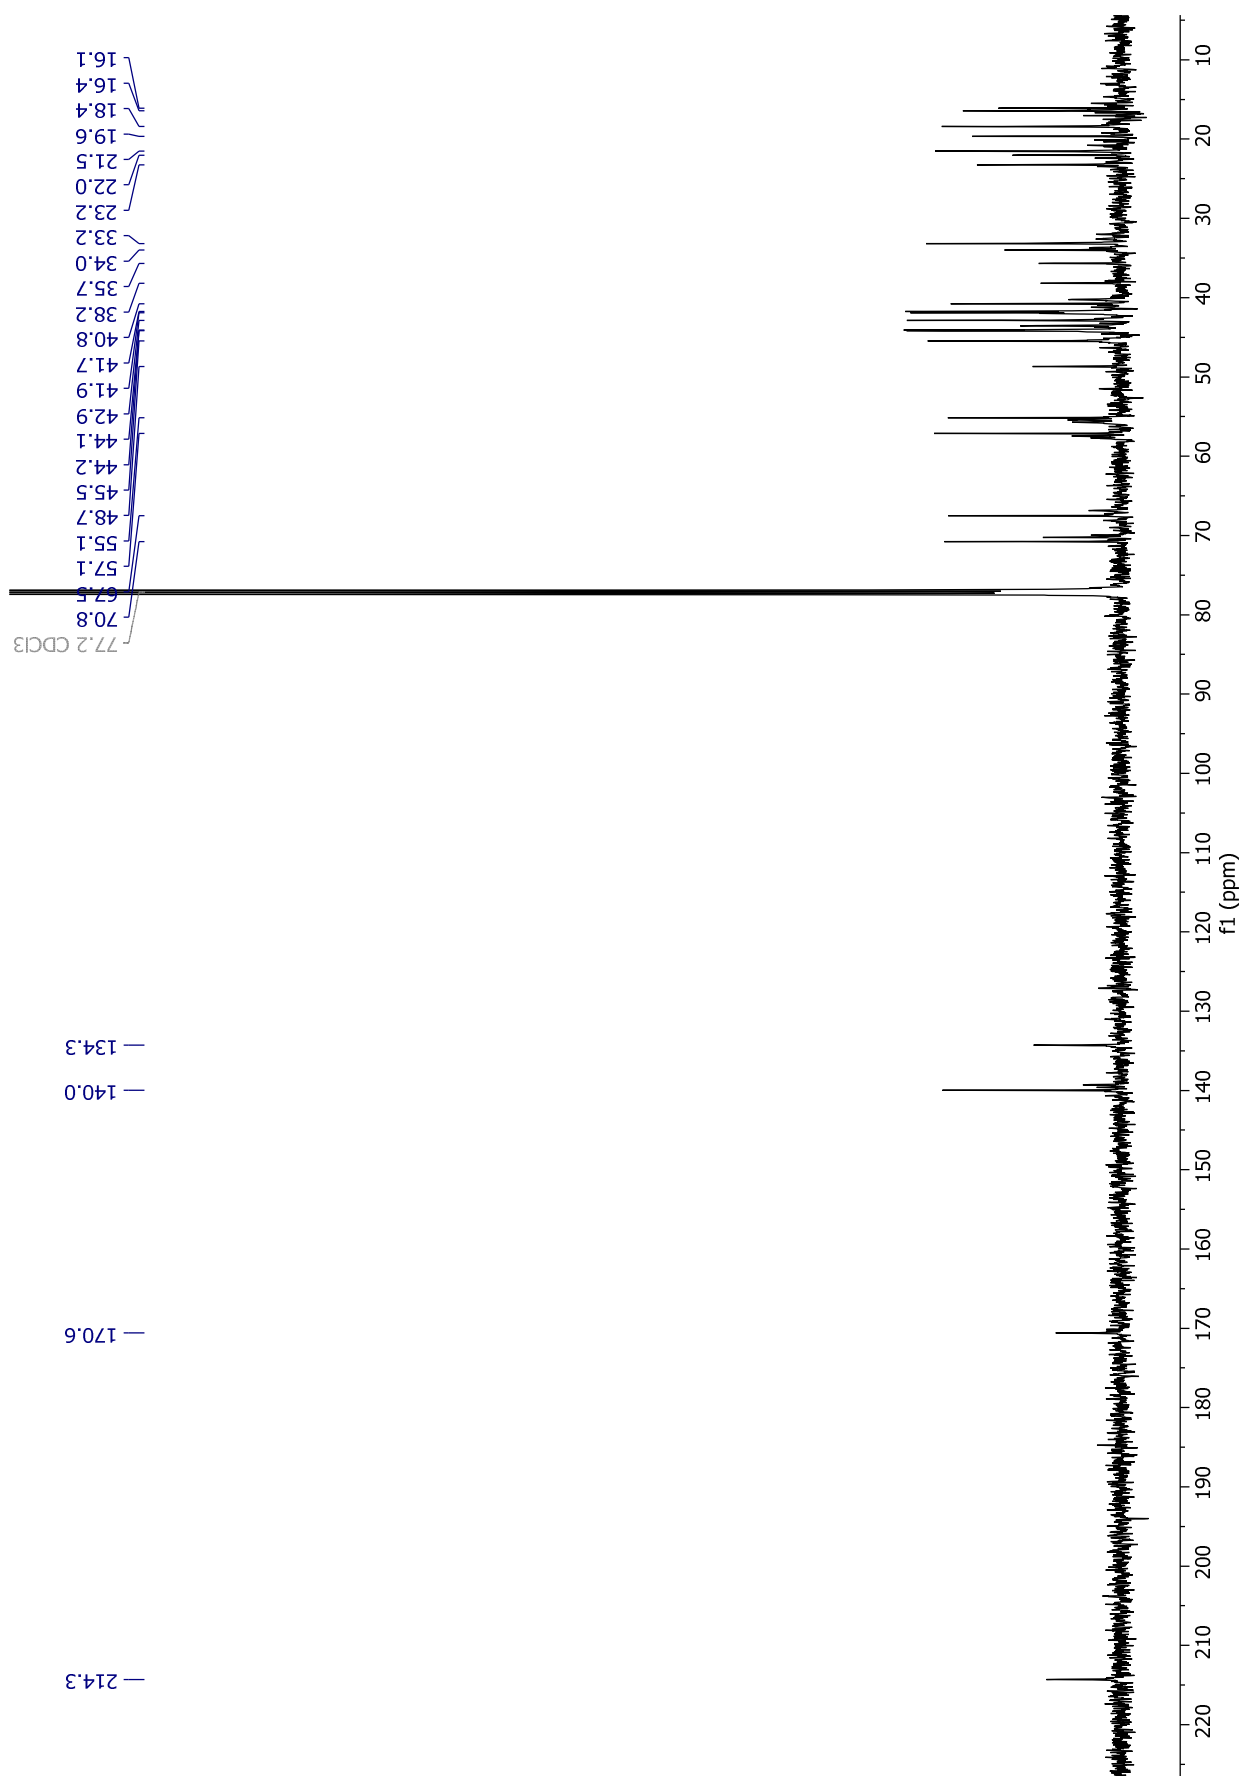

Figure S3 – COSY NMR spectrum (500 MHz,  $\text{CDCl}_3$ ) of **1**

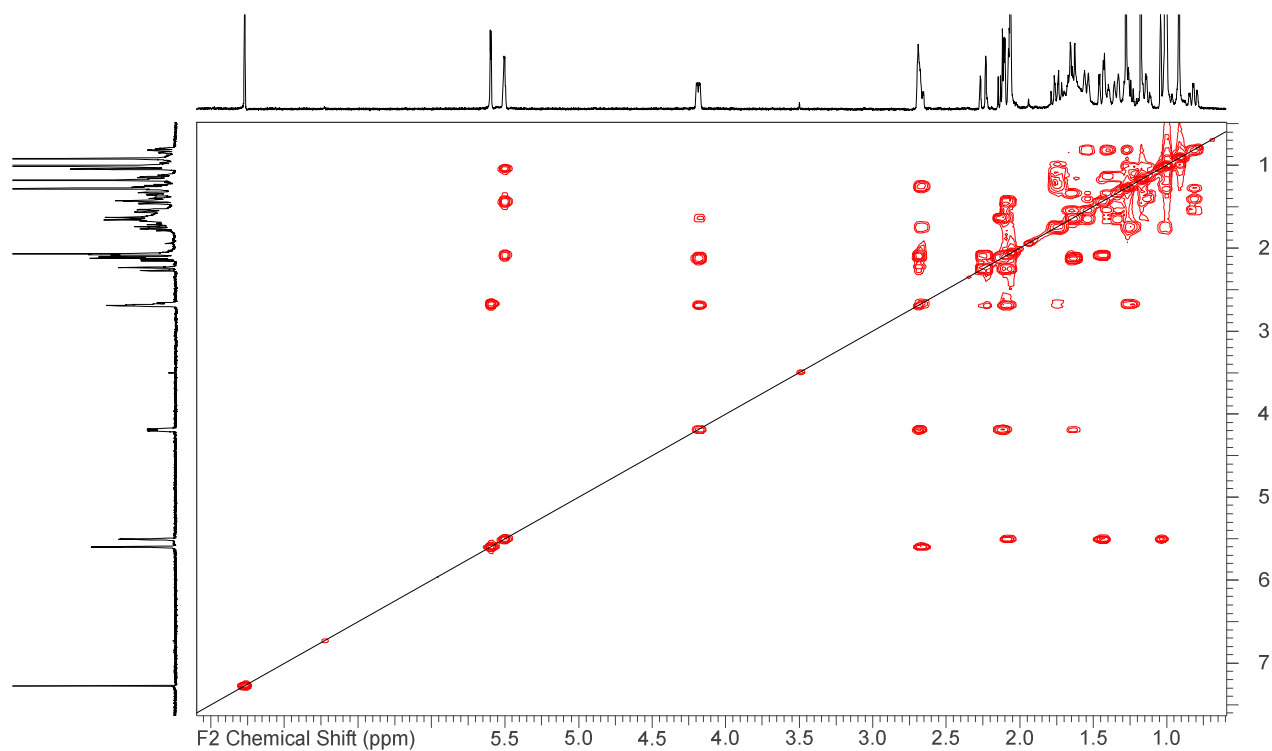

Figure S4 – HSQC NMR spectrum (500 MHz,  $\text{CDCl}_3$ ) of **1**

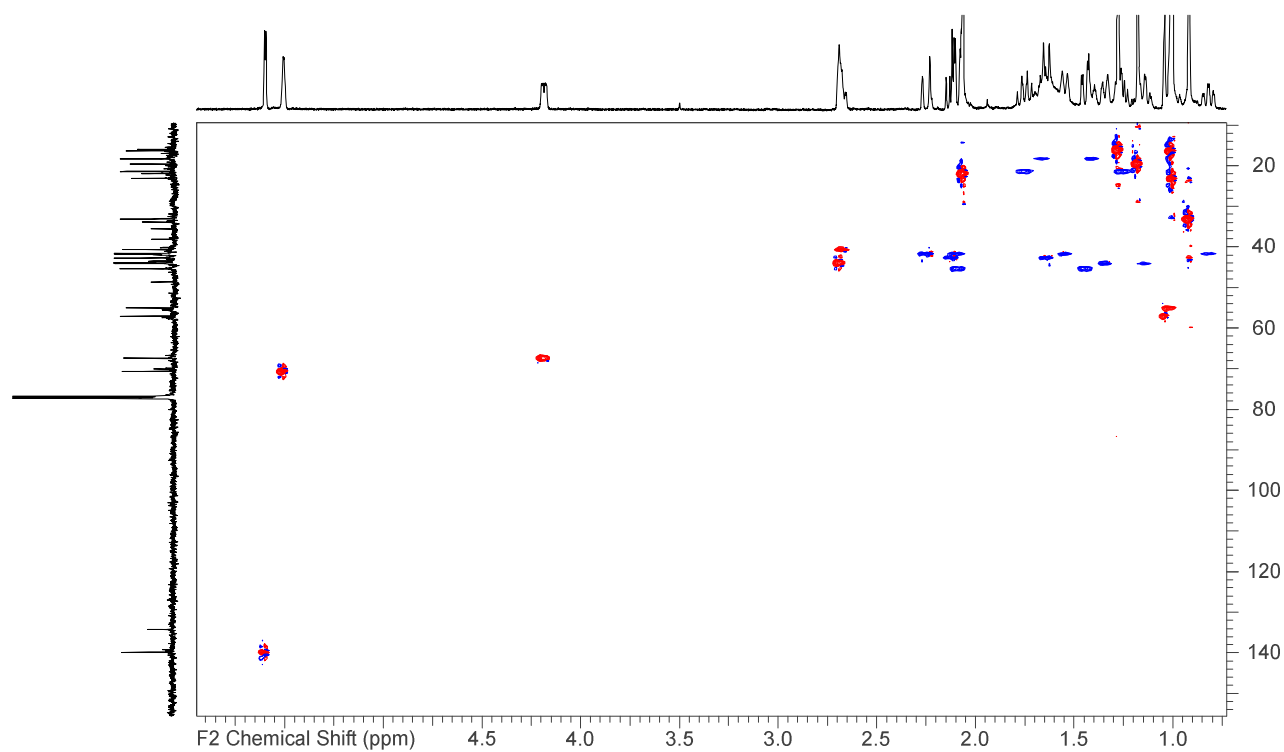

Figure S5 – HMBC NMR spectrum (500 MHz, CDCl<sub>3</sub>) of **1**

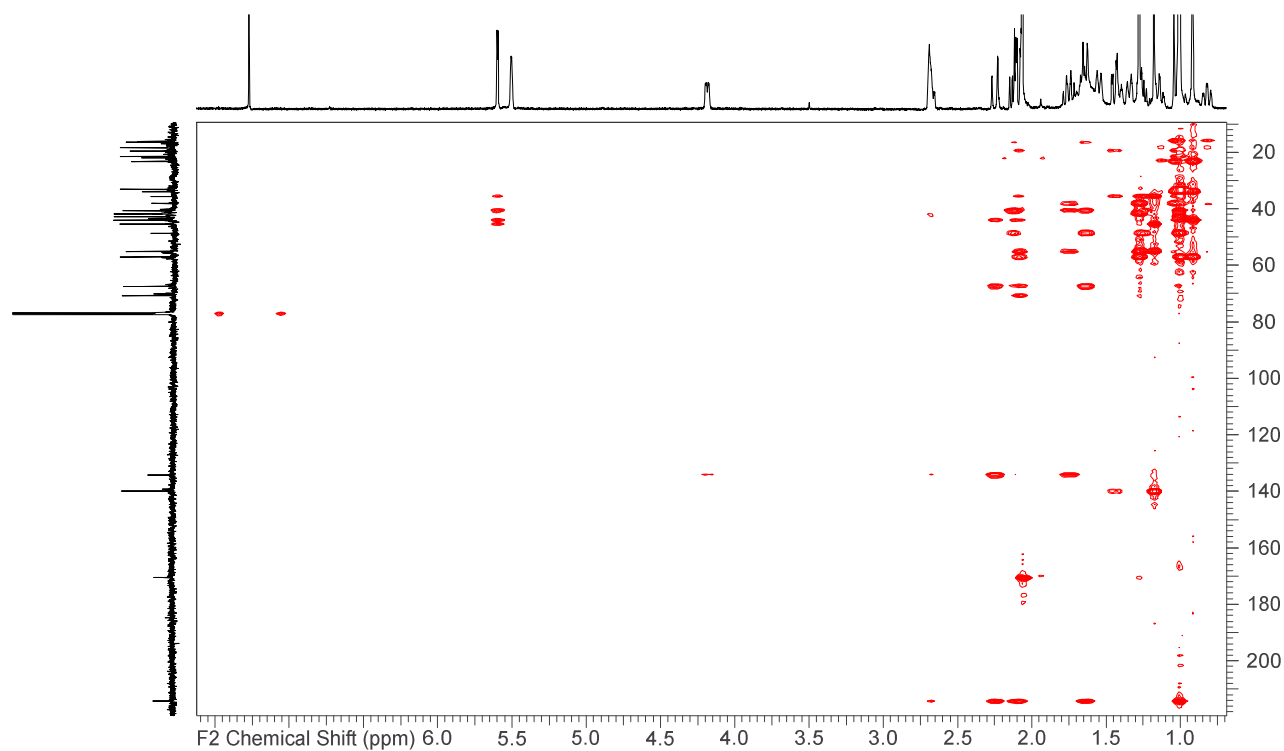

Figure S6 – NOESY NMR spectrum (600 MHz, CDCl<sub>3</sub>) of **1**

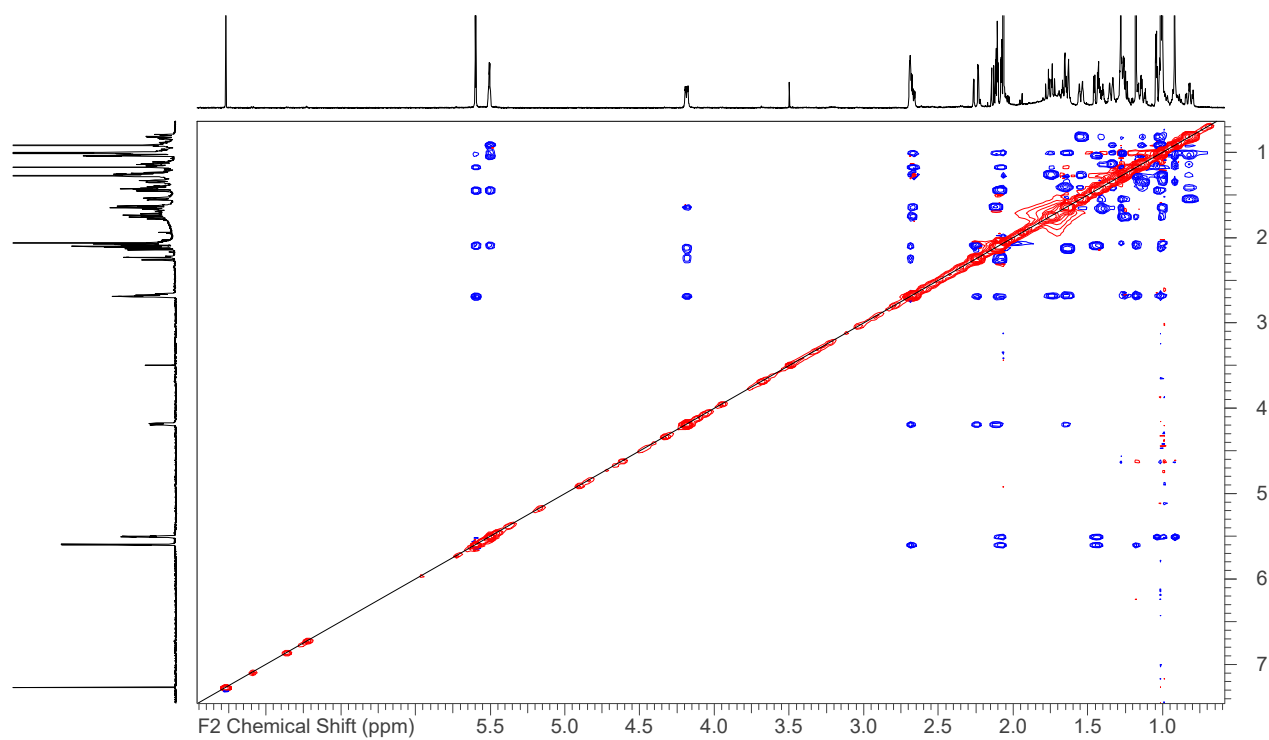

Figure S7 – HRESIMS analysis of **1**

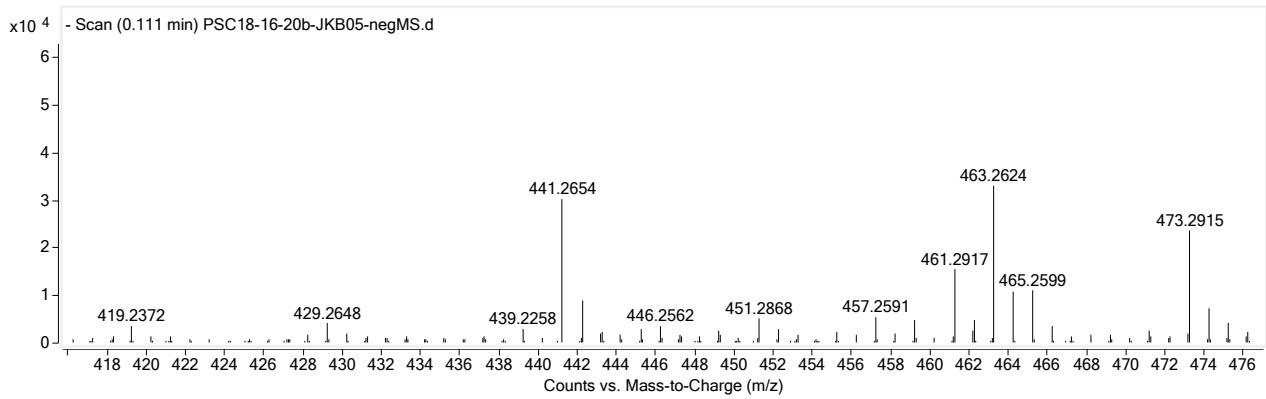

|           |             |            |            |             |               |              |                    |                      |            |       |
|-----------|-------------|------------|------------|-------------|---------------|--------------|--------------------|----------------------|------------|-------|
|           |             | C27 H40 O4 | 93.9       | 428.29332   |               |              | -1.54              | 1.54                 | -0.66      | 0.111 |
| Species   | Ion Formula | m/z        | Height     | Score (MFG) | Score (MS)    | Score (mass) | Score (iso. abund) | Score (iso. spacing) |            |       |
| (M-H)-    |             | 427.2805   | 199.1      |             | 14            | 29.41        | 0                  | 0                    |            |       |
| (M+Cl)-   |             | 463.2628   | 14983.1    |             | 82.58         | 98.37        | 44.66              | 96.5                 |            |       |
| (M+HCOO)- |             | 473.2915   | 12188.9    |             | 93.9          | 96.88        | 88.47              | 94.44                |            |       |
| m/z       | m/z (Calc)  | Diff (ppm) | Diff (mDa) | Height      | Height (Calc) | Height %     | Height % (Calc)    | Height Sum %         | Height Sur |       |
| 473.2915  | 473.2909    | -1.32      | -0.6       | 11783.3     | 12188.9       | 100          | 100                | 70.6                 |            |       |
| 474.2952  | 474.2943    | -2.02      | -1         | 3760.4      | 3776.6        | 31.9         | 31                 | 22.5                 |            |       |
| 475.2996  | 475.2971    | -5.26      | -2.5       | 1137.2      | 715.4         | 9.7          | 5.9                | 6.8                  |            |       |

Table S2 – NMR data for suberitenone E (**2**) (500 ( $^1\text{H}$ ) and 125 ( $^{13}\text{C}$ ) MHz,  $\text{CD}_3\text{OD}$ ).

| pos        | $\delta_{\text{C}}$ , type | $\delta_{\text{H}}$   | gCOSY                | gHMBC                          | NOESY            |
|------------|----------------------------|-----------------------|----------------------|--------------------------------|------------------|
| <b>1</b>   | 65.9, CH                   | 4.40, t (4.4)         | 2, 6                 | 2, 3, 5, 6, 7                  | 23, 22, 8        |
| <b>2</b>   | 145.5, CH                  | 6.76, dq (5.4, 1.3)   | 1, 21                | 1, 4, 6, 21                    | 6, 5, 5'         |
| <b>3</b>   | 136.9, C                   |                       |                      |                                |                  |
| <b>4</b>   | 201.6, C                   |                       |                      |                                |                  |
| <b>5</b>   | 35.3, $\text{CH}_2$        | 2.73, dd (16.6, 12.4) | 5', 6                | 1, 4, 6, 7                     | 8', 2            |
| <b>5'</b>  |                            | 2.37, dd (16.6, 4.1)  | 5, 6                 | 1, 3, 4, 6, 7                  | 2                |
| <b>6</b>   | 47.9, CH                   | 1.90, o/l             | 1, 5, 5'             | 1, 4, 5, 7, 8                  | 22, 2            |
| <b>7</b>   | 63.4, C                    |                       |                      |                                |                  |
| <b>8</b>   | 26.7, $\text{CH}_2$        | 2.35, o/l             | 8', 9                | 9, 10                          | 1                |
| <b>8'</b>  |                            | 1.71, o/l             | 8, 9                 | 7, 9, 22                       | 5                |
| <b>9</b>   | 16.9, $\text{CH}_2$        | 1.43, o/l             | 8, 8', 10            | 7, 8, 10, 11                   | 22               |
| <b>10</b>  | 49.2, CH                   | 1.28, m               | 9                    | 8, 9, 15, 23, 24               | 14, 16'          |
| <b>11</b>  | 34.8, C                    |                       |                      |                                |                  |
| <b>12</b>  | 42.5, $\text{CH}_2$        | 1.87, o/l             | 12', 13              | 10, 11, 13, 14, 23             | 23               |
| <b>12'</b> |                            | 1.65, dd (14.6, 3.6)  | 12, 13               | 11, 22, 23                     | 14, 22           |
| <b>13</b>  | 72.0, CH                   | 5.55, br q (2.5)      | 12, 12', 14          | 11, 15                         | 20               |
| <b>14</b>  | 57.5, CH                   | 1.07, br d (2.0)      | 13                   | 10, 15, 16, 18, 19, 20, 24, 25 | 10, 12', 20, 16' |
| <b>15</b>  | 38.0, C                    |                       |                      |                                |                  |
| <b>16</b>  | 43.1, $\text{CH}_2$        | 1.69, m               | 16', 17, 17'         | 18                             |                  |
| <b>16'</b> |                            | 0.87, m               | 16, 17'              | 10, 15, 17, 24                 | 10, 14           |
| <b>17</b>  | 19.6, $\text{CH}_2$        | 1.74, o/l             | 16, 17', 18, 18'     | 16                             | 25, 24           |
| <b>17'</b> |                            | 1.45, o/l             | 16, 16', 17, 18, 18' |                                |                  |
| <b>18</b>  | 45.2, $\text{CH}_2$        | 1.36, m               | 17, 17', 18'         |                                | 20, 25           |
| <b>18'</b> |                            | 1.22, m               | 17, 17', 18          |                                |                  |
| <b>19</b>  | 35.0, C                    |                       |                      |                                |                  |
| <b>20</b>  | 33.4, $\text{CH}_3$        | 0.92, s               |                      | 14, 18, 19, 25                 | 13, 14, 18       |
| <b>21</b>  | 15.7, $\text{CH}_3$        | 1.76, s               |                      | 2, 3, 4                        |                  |
| <b>22</b>  | 70.1, CH                   | 2.63, br s            |                      | 6, 7, 10, 11, 12, 23           | 1, 6, 12', 9, 23 |
| <b>23</b>  | 19.7, $\text{CH}_3$        | 1.27, s               |                      | 10, 11, 12, 22                 | 1, 12, 22, 17    |
| <b>24</b>  | 17.9, $\text{CH}_3$        | 1.21, s               |                      | 10, 14, 15, 16                 | 17               |
| <b>25</b>  | 23.6, $\text{CH}_3$        | 1.02, s               |                      | 14, 18, 19, 20                 | 17, 18           |
| <b>26</b>  | 172.3, C                   |                       |                      |                                |                  |
| <b>27</b>  | 21.8, $\text{CH}_3$        | 2.05, s               |                      | 26                             | 25, 23, 24       |

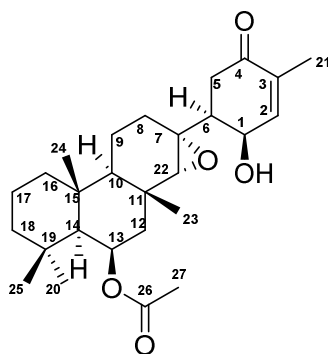



Figure S8 –  $^1\text{H}$  NMR spectrum (500 MHz,  $\text{CD}_3\text{OD}$ ) of **2**

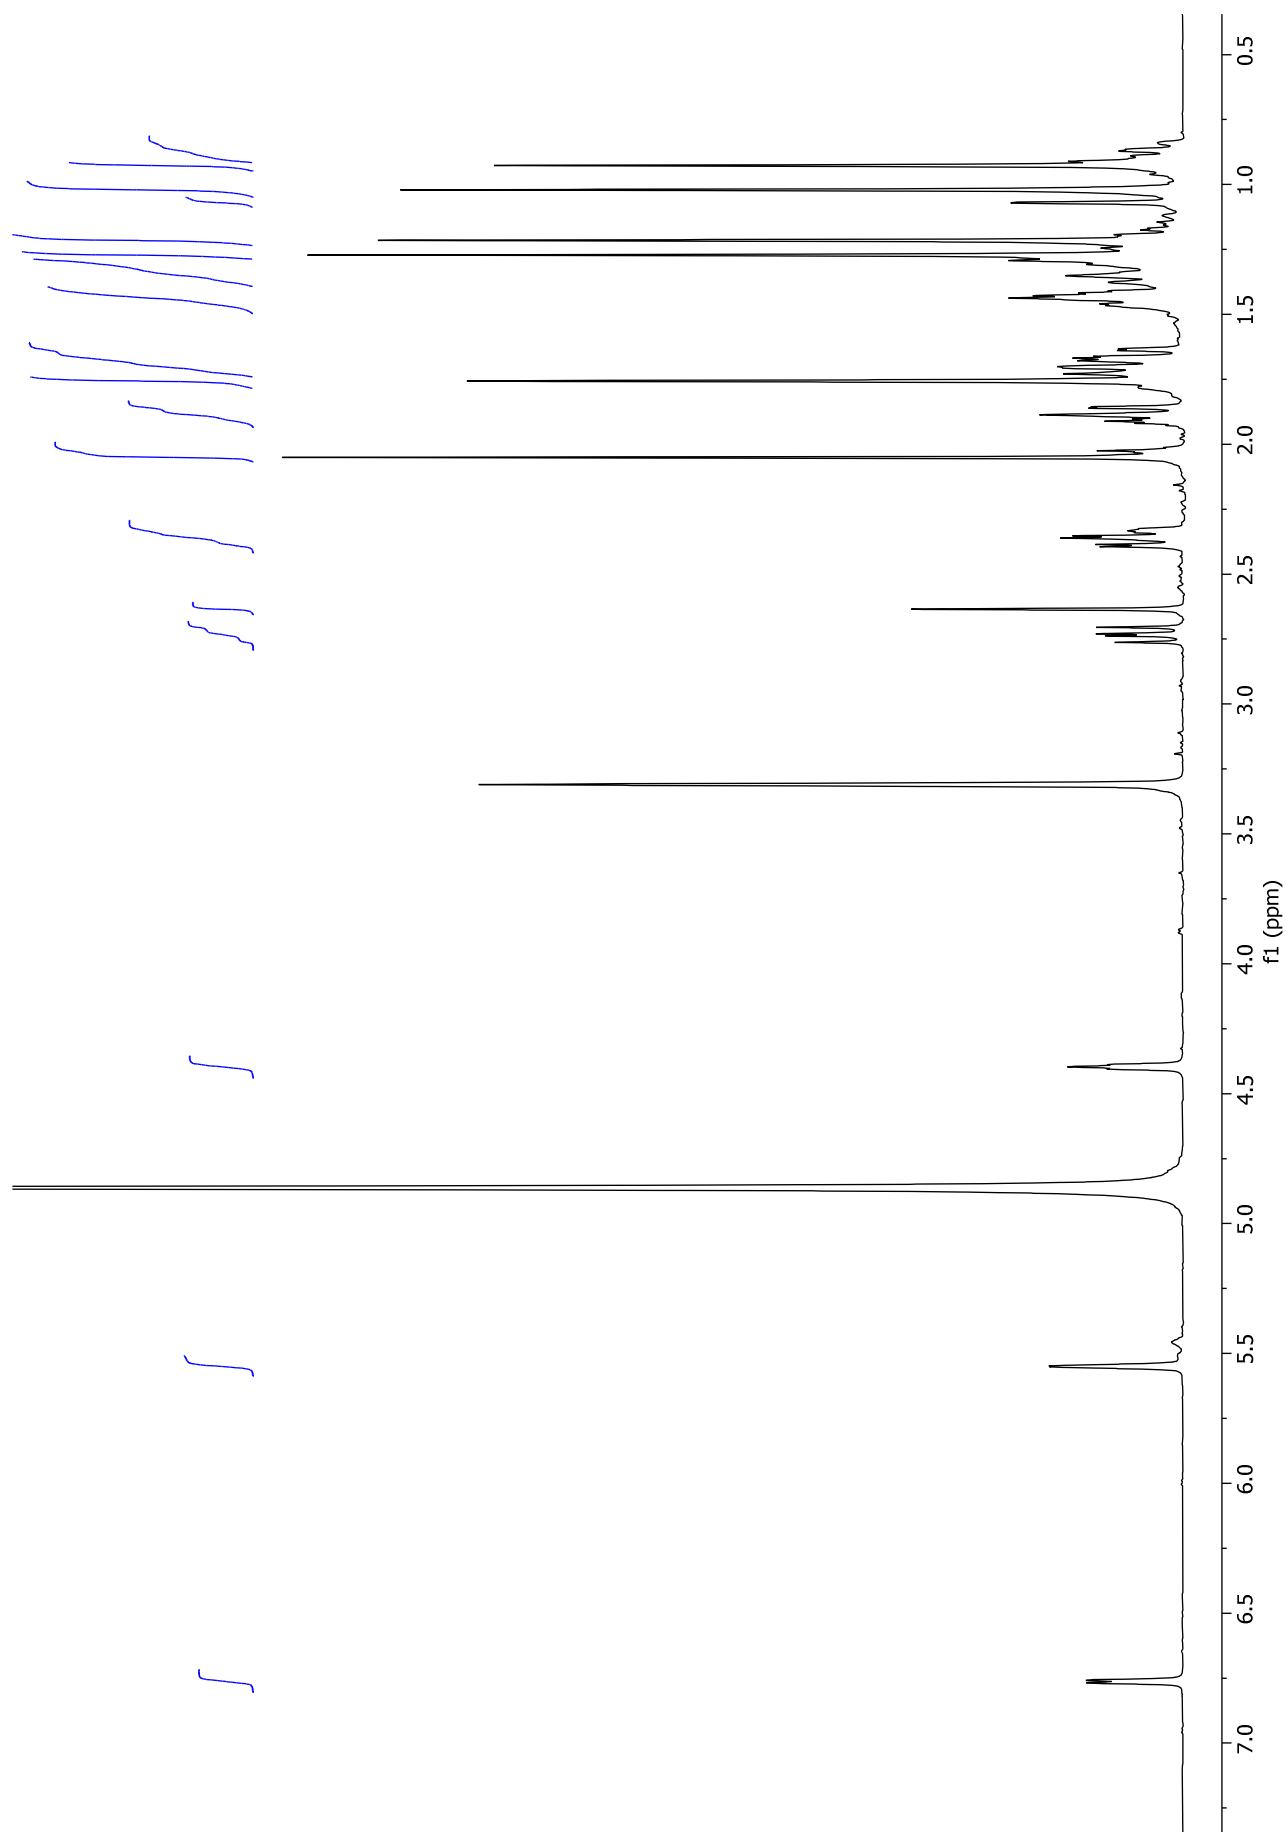

Figure S9 –  $^{13}\text{C}$  NMR spectrum (150 MHz,  $\text{CD}_3\text{OD}$ ) of **2** (formic acid impurity  $\delta_{\text{C}}$  170.3)

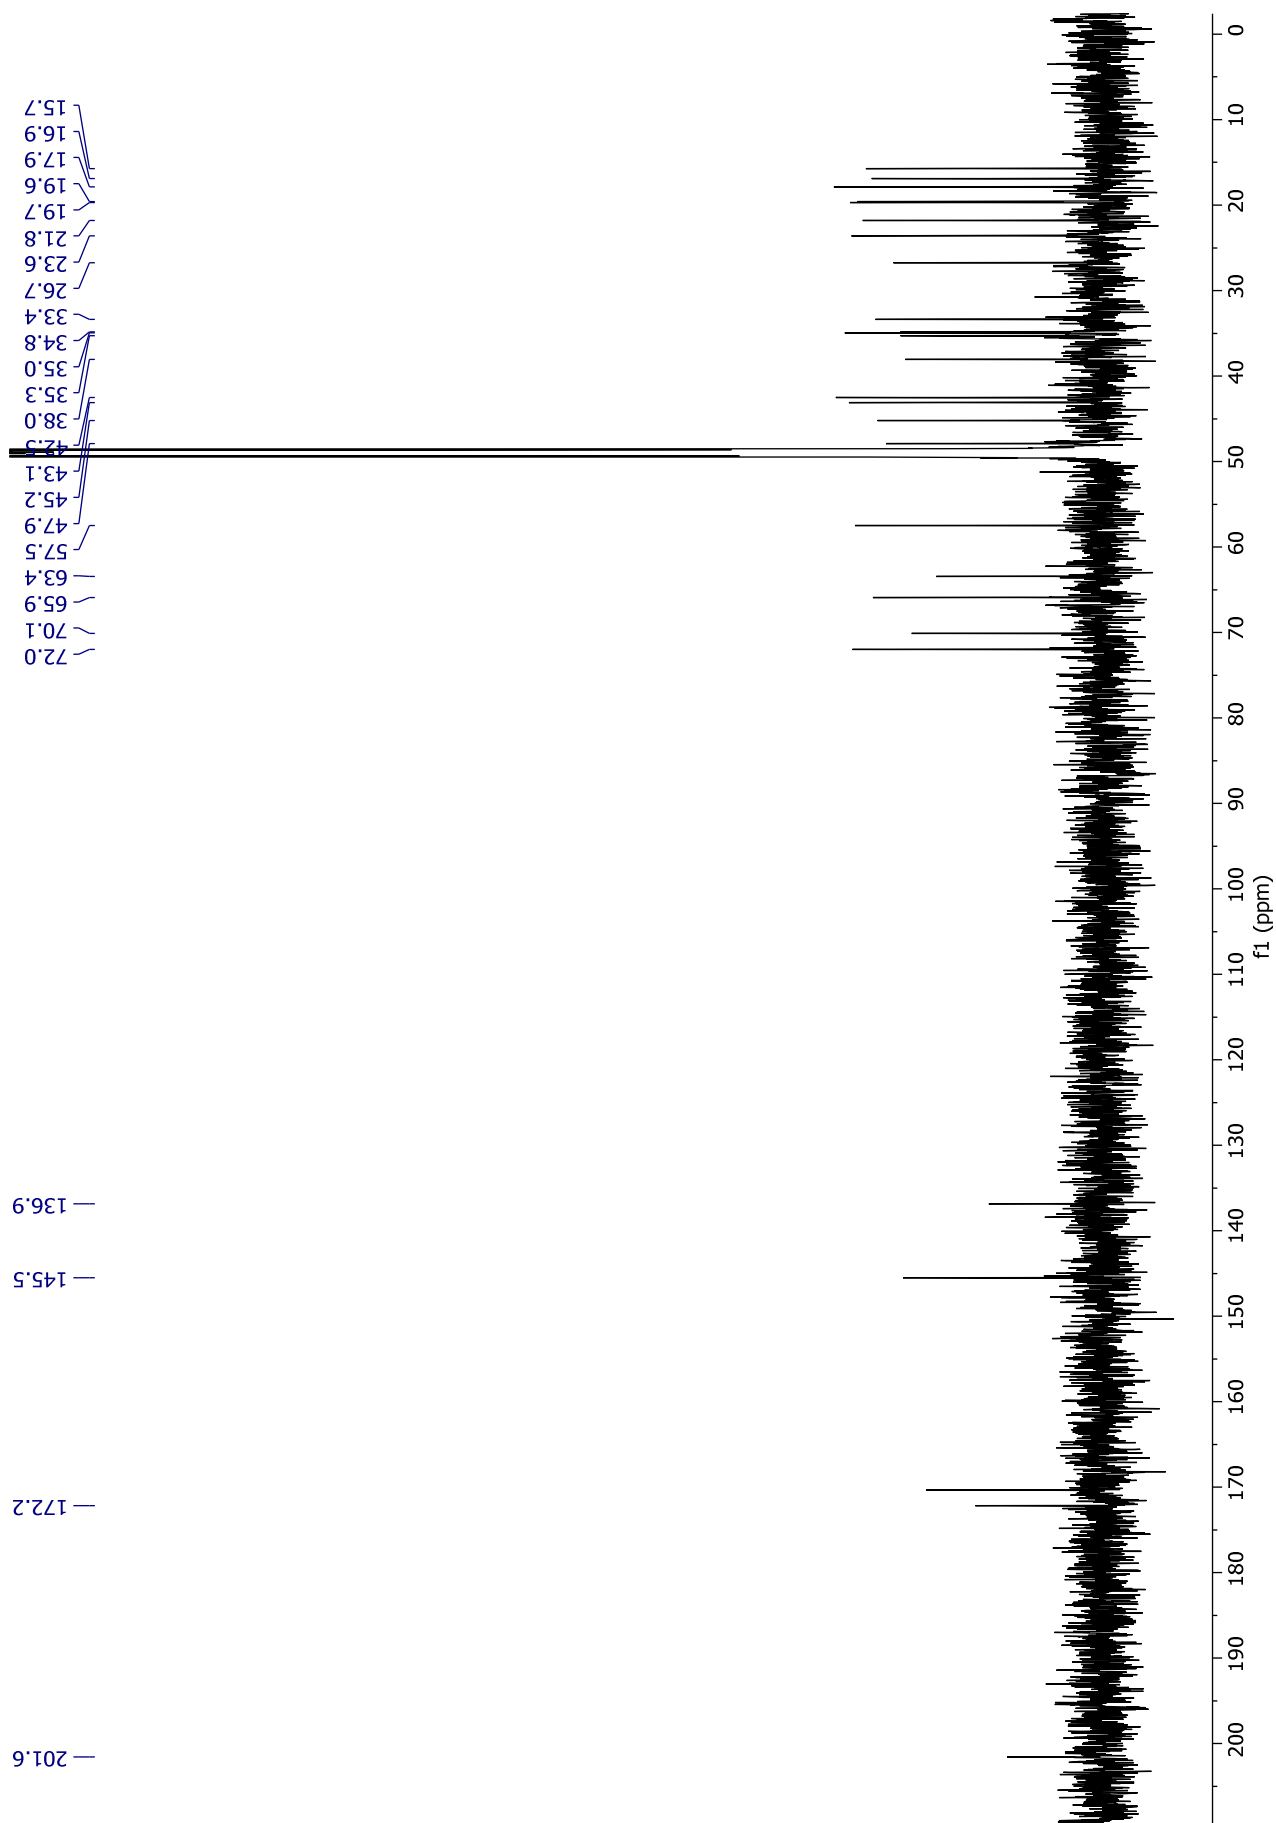

Figure S10 – COSY NMR spectrum (500 MHz, CD<sub>3</sub>OD) of **2**

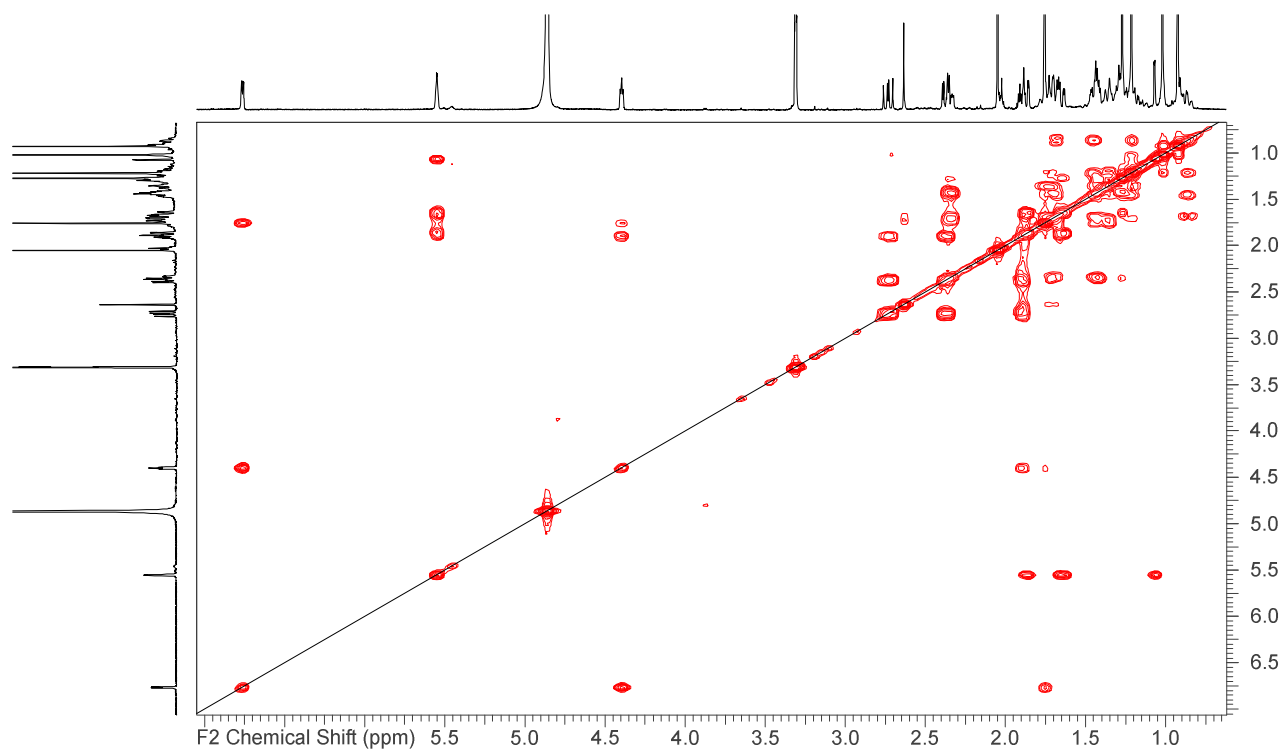

Figure S11 – HSQC NMR spectrum (500 MHz, CD<sub>3</sub>OD) of **2**

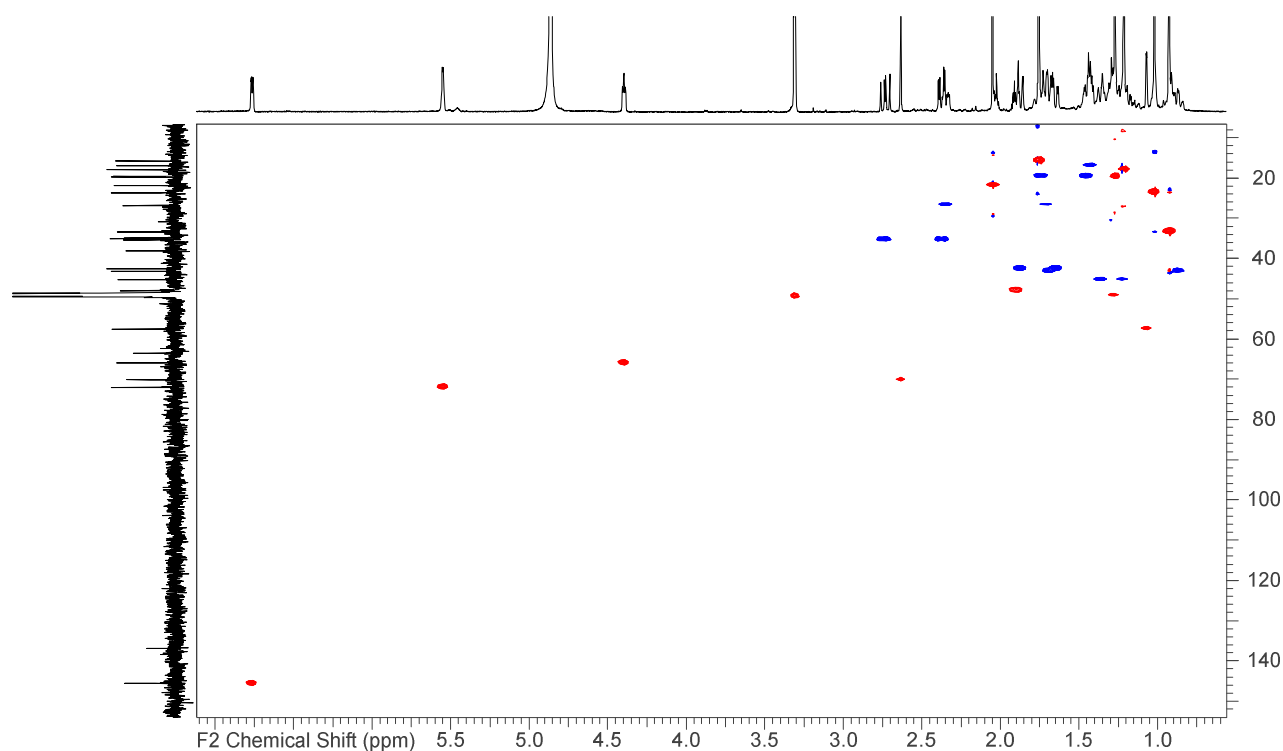

Figure S12 – HMBC NMR spectrum (500 MHz, CD<sub>3</sub>OD) of **2**

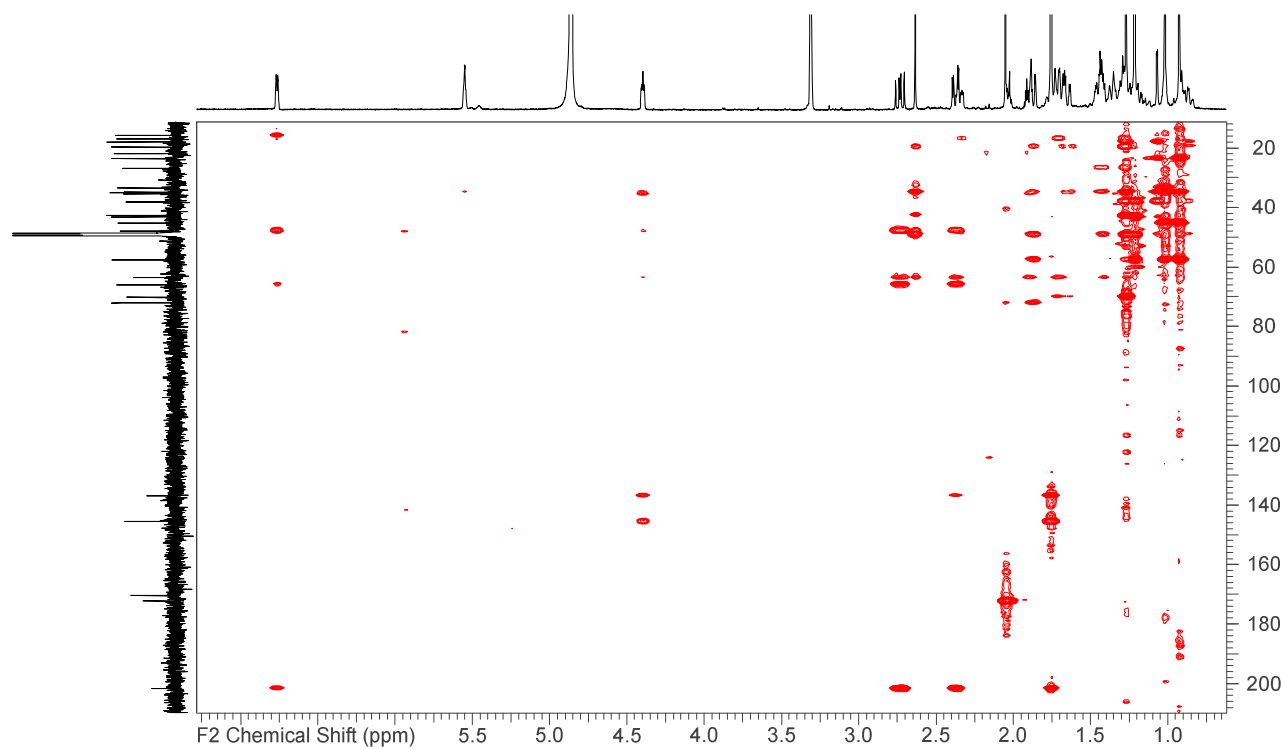

Figure S13 – NOESY NMR spectrum (500 MHz, CD<sub>3</sub>OD) of **2**

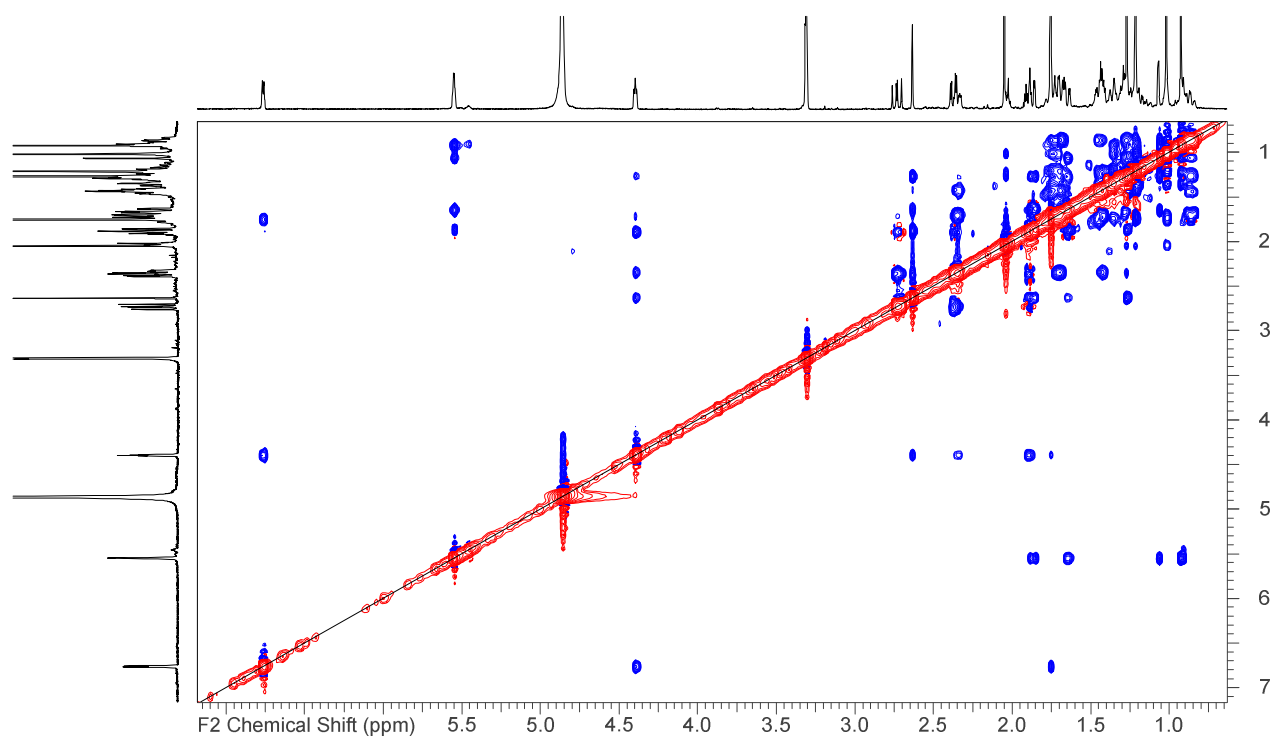

Figure S14 – HRESIMS analysis of **2**

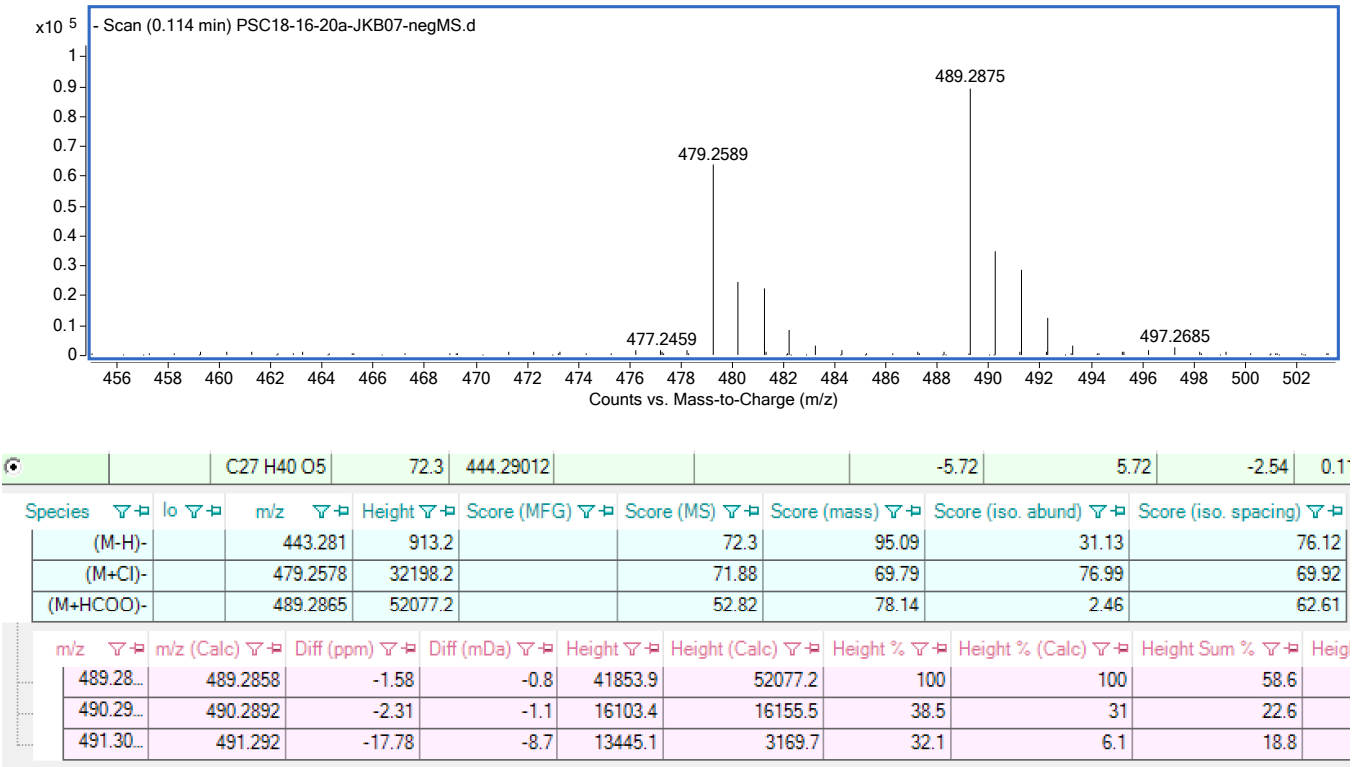

Table S3 – NMR data for suberitenone F (**3**) (600 ( $^1\text{H}$ ) and 150 ( $^{13}\text{C}$ ) MHz,  $\text{CD}_3\text{OD}$ ).

| pos | $\delta_{\text{C}}$ , type | $\delta_{\text{H}}$   | gCOSY                 | gHMBC                                 | NOESY                    |
|-----|----------------------------|-----------------------|-----------------------|---------------------------------------|--------------------------|
| 1   | 66.0, CH                   | 4.30, dd (5.6, 3.3)   | 2, 6, 21              | 2, 3, 5                               | 8, 5', 22, 23            |
| 2   | 145.8, CH                  | 6.85, dq (5.5, 1.4)   | 1, 21                 | 1, 4, 6, 21                           | 5, 6                     |
| 3   | 136.9, C                   |                       |                       |                                       |                          |
| 4   | 202.6, C                   |                       |                       |                                       |                          |
| 5   | 38.5, $\text{CH}_2$        | 2.83, dd (15.9, 12.8) | 5', 6                 | 1, 4, 6                               | 2, 8, 22                 |
| 5'  |                            | 2.31, (16.1, 2.8)     | 5, 6                  | 1, 3, 4, 6                            | 1, 8, 22                 |
| 6   | 45.4, CH                   | 2.90, m               | 1, 5, 5'              | 1, 4, 7                               | 2, 8, 22                 |
| 7   | 137.2, C                   |                       |                       |                                       |                          |
| 8   | 128.9, CH                  | 5.67, t (3.2)         | 9                     | 6, 9, 10, 22                          | 1, 5, 5', 6, 10, 23      |
| 9   | 24.1, $\text{CH}_2$        | 2.12, o/l             | 8, 10                 | 7, 8, 10                              | 23, 24                   |
| 10  | 46.8, CH                   | 1.60, dd (11.3, 5.9)  | 9                     | 9, 11, 15, 16, 22, 23, 24             | 8, 12, 14, 16'           |
| 11  | 38.0, C                    |                       |                       |                                       |                          |
| 12  | 39.8, $\text{CH}_2$        | 2.16, o/l             | 12', 13               | 23, 11, 10, 22,                       | 10, 14, 16, 22           |
| 12' |                            | 1.53, dd (15.0, 2.7)  | 12, 13                | 10, 11, 13, 14, 23                    | 22, 23                   |
| 13  | 72.3, CH                   | 5.61, dt (4.4, 2.4)   | 12, 12', 14           | 11, 15                                | 20                       |
| 14  | 57.2, CH                   | 1.13, d (2.1)         | 13                    | 10, 12, 15, 16, 18, 19,<br>20, 24, 25 | 10, 12, 16', 18', 20     |
| 15  | 38.0, C                    |                       |                       |                                       |                          |
| 16  | 43.5, $\text{CH}_2$        | 1.72, o/l             | 16', 17, 17'          | 14, 18                                | 9, 10, 24                |
| 16' |                            | 0.99, o/l             | 16, 17, 17'           |                                       |                          |
| 17  | 19.6, $\text{CH}_2$        | 1.73, o/l             | 16, 16', 17', 18, 18' |                                       | 24, 25                   |
| 17' |                            | 1.46, m               | 16, 16', 17', 18, 18  |                                       |                          |
| 18  | 45.1, $\text{CH}_2$        | 1.39, m               | 17, 17', 18'          |                                       | 20, 25                   |
| 18' |                            | 1.24, td (13.1, 3.9)  | 17, 17', 18           | 19, 25                                | 20                       |
| 19  | 34.8, C                    |                       |                       |                                       |                          |
| 20  | 33.8, $\text{CH}_3$        | 0.96, s               |                       | 14, 18, 19, 25                        | 13, 14, 18, 18', 25      |
| 21  | 15.6, $\text{CH}_3$        | 1.78, s               | 1, 2                  | 2, 3, 4                               |                          |
| 22  | 75.3, CH                   | 3.15, s               |                       | 6, 7, 8, 10, 11, 12, 23               | 1, 5, 5', 6, 12, 12', 23 |
| 23  | 20.8, $\text{CH}_3$        | 0.99, s               |                       | 10, 11, 12, 22                        | 1, 8, 9, 22, 24, 27      |
| 24  | 17.6, $\text{CH}_3$        | 1.34, s               |                       | 10, 14, 15, 16                        | 9, 16, 17, 23, 25        |
| 25  | 23.8, $\text{CH}_3$        | 1.04, s               |                       | 14, 18, 19, 20                        | 17, 18, 20, 24, 27       |
| 26  | 172.4, C                   |                       |                       |                                       |                          |
| 27  | 21.9, $\text{CH}_3$        | 2.04, s               |                       | 26                                    | 23, 24, 25               |

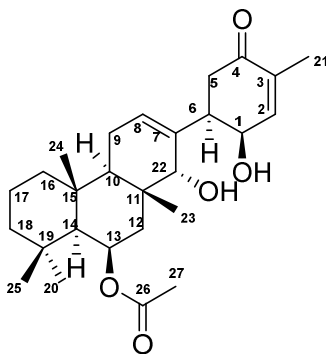

Figure S15 –  $^1\text{H}$  NMR spectrum (600 MHz,  $\text{CD}_3\text{OD}$ ) of **3**

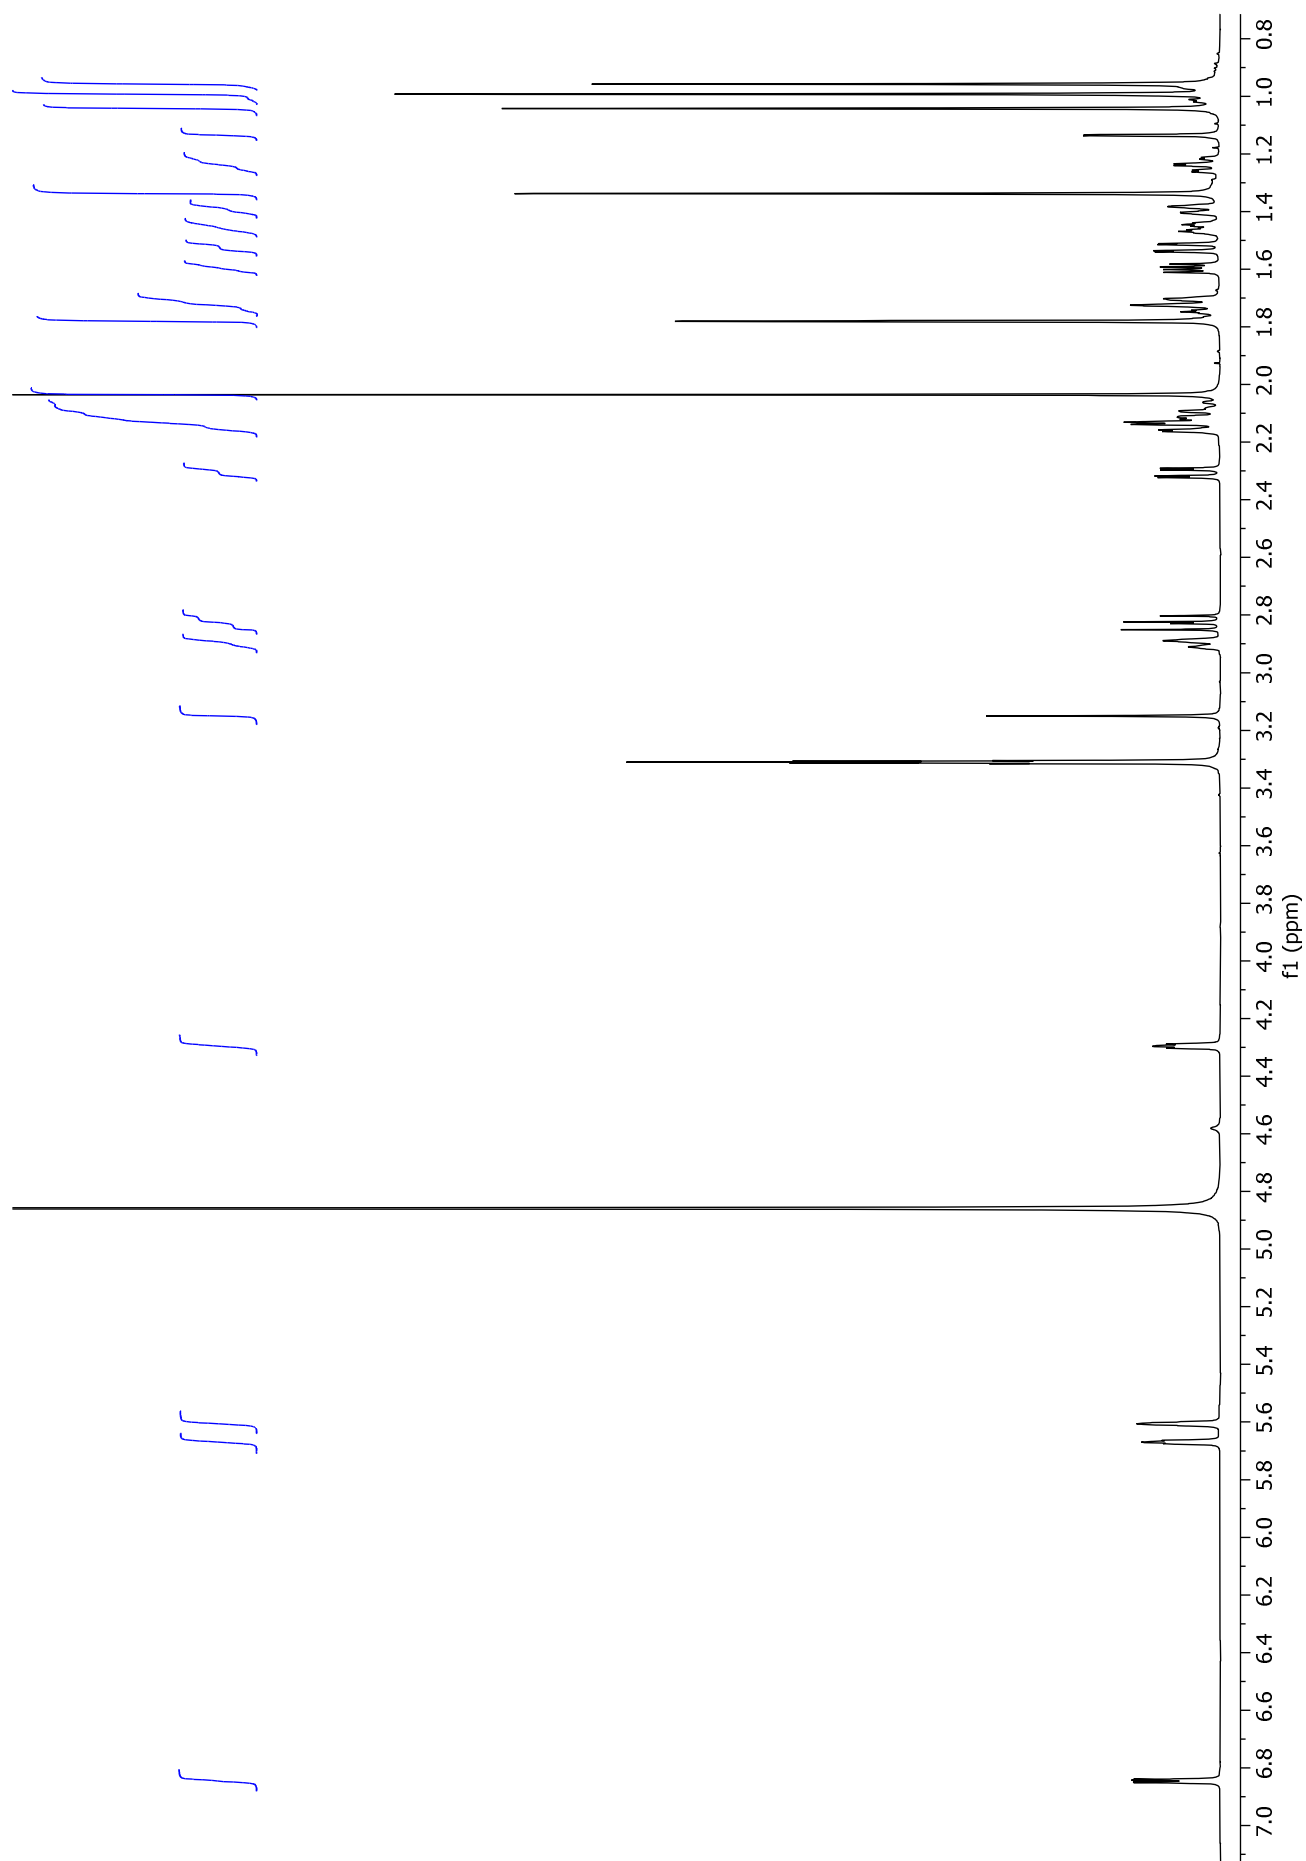

Figure S16 –  $^{13}\text{C}$  NMR spectrum (150 MHz,  $\text{CD}_3\text{OD}$ ) of **3**

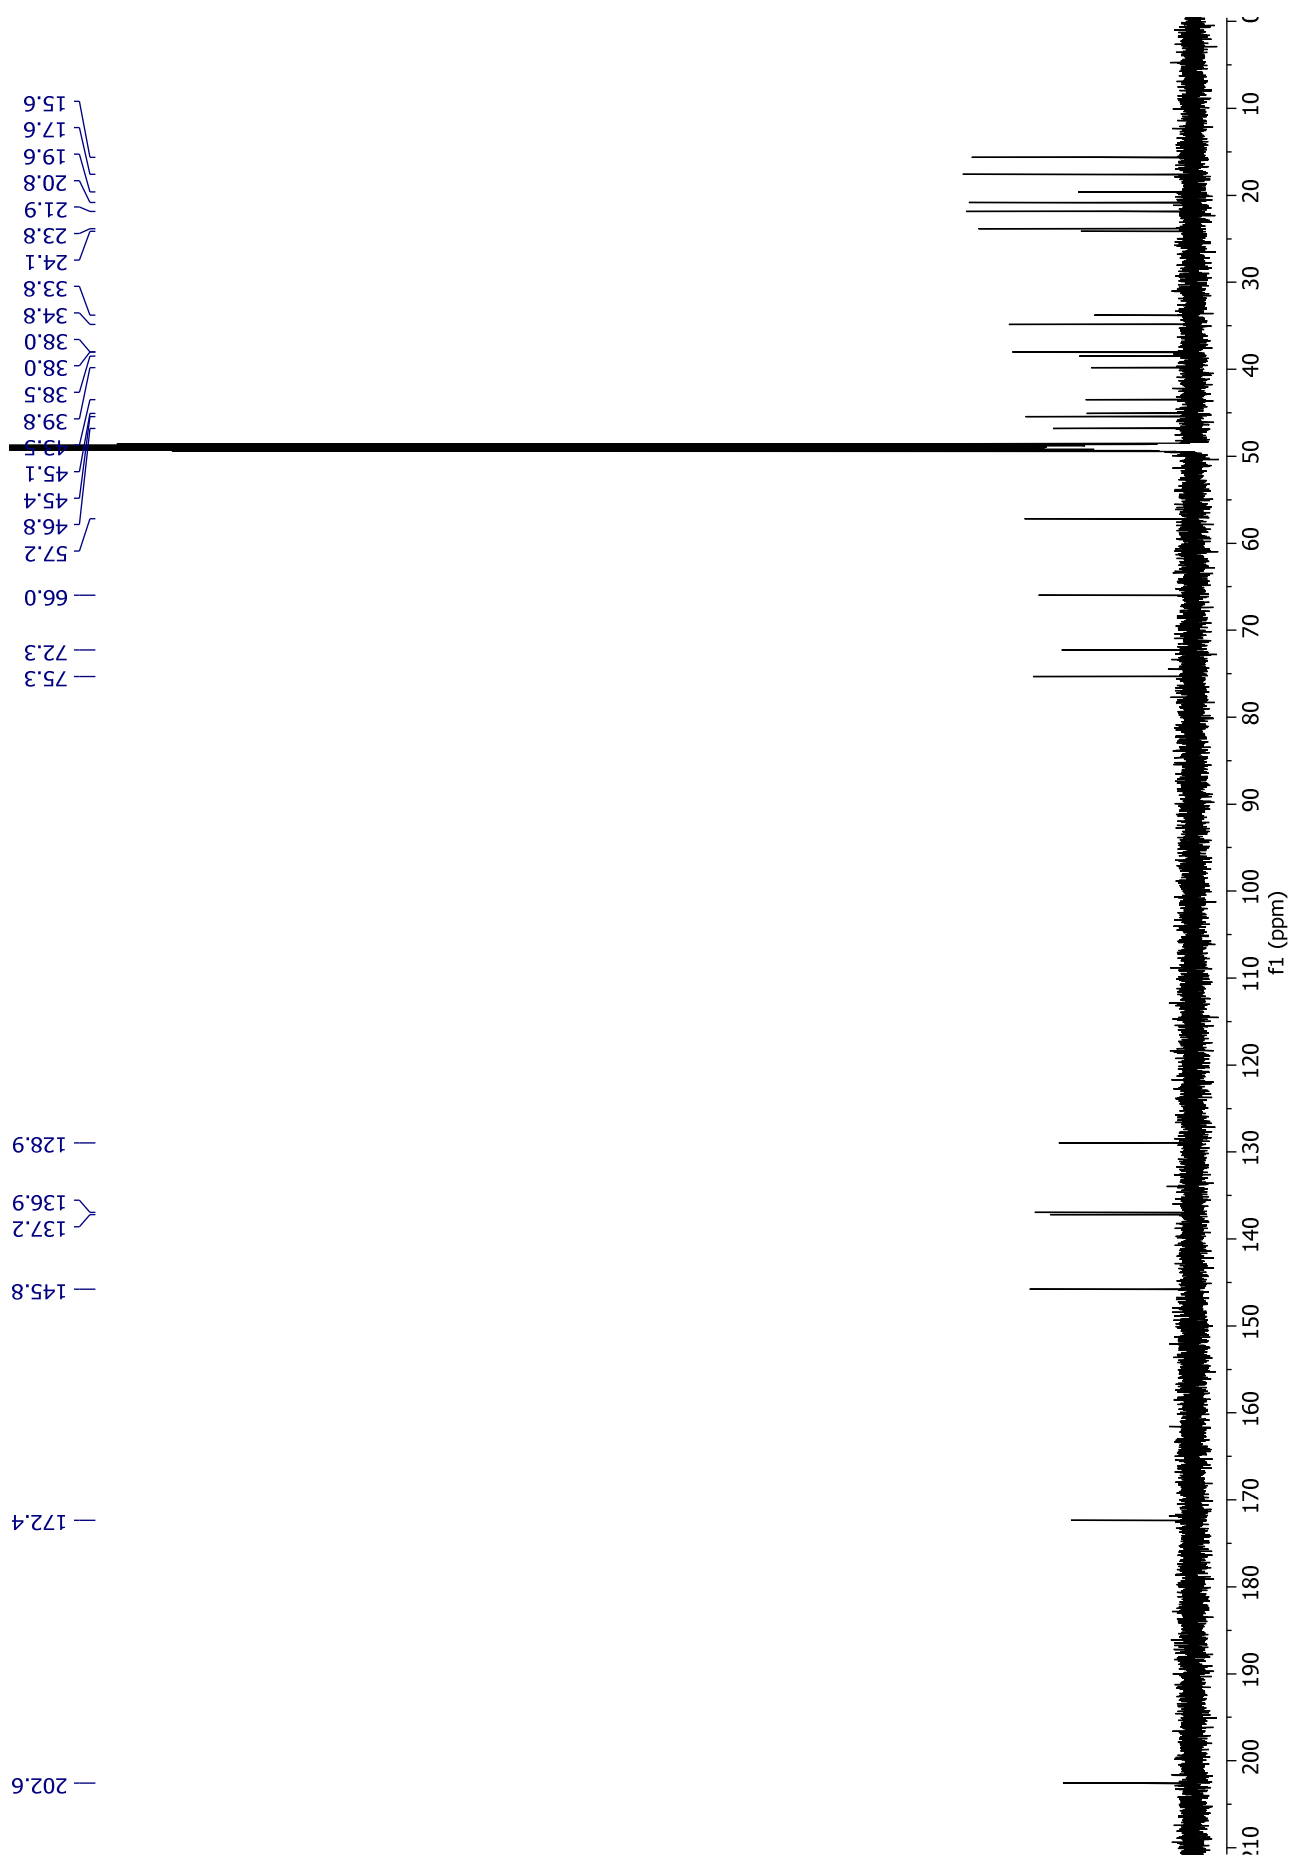



Figure S17 – COSY NMR spectrum (600 MHz, CD<sub>3</sub>OD) of **3**

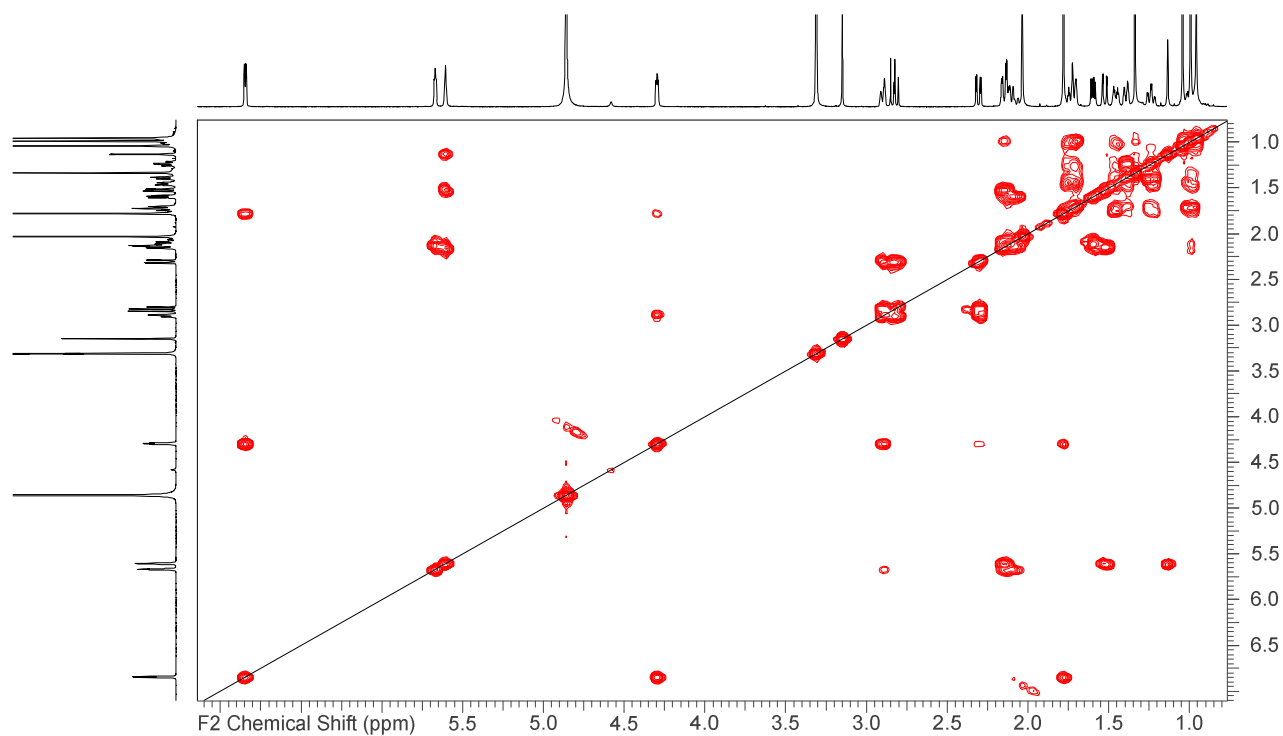

Figure S18 – HSQC NMR spectrum (600 MHz, CD<sub>3</sub>OD) of **3**

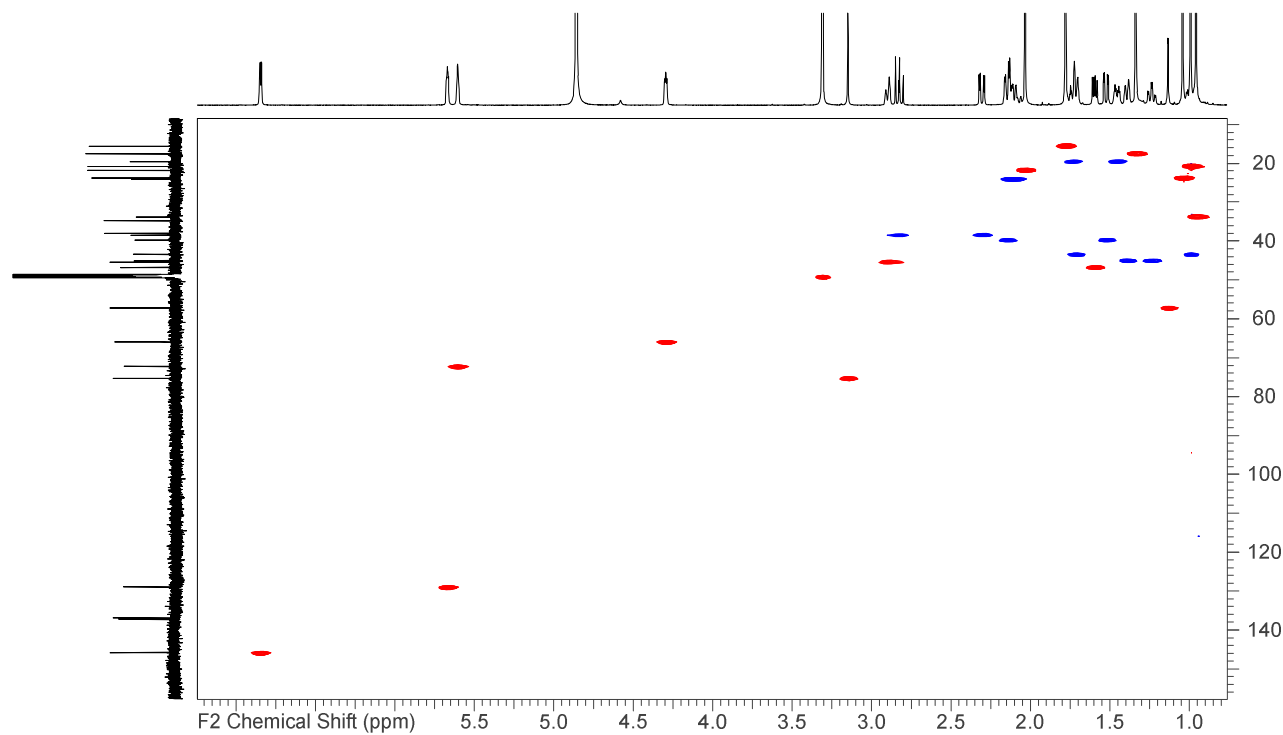

Figure S19 – HMBC NMR spectrum (500 MHz, CD<sub>3</sub>OD) of **3**

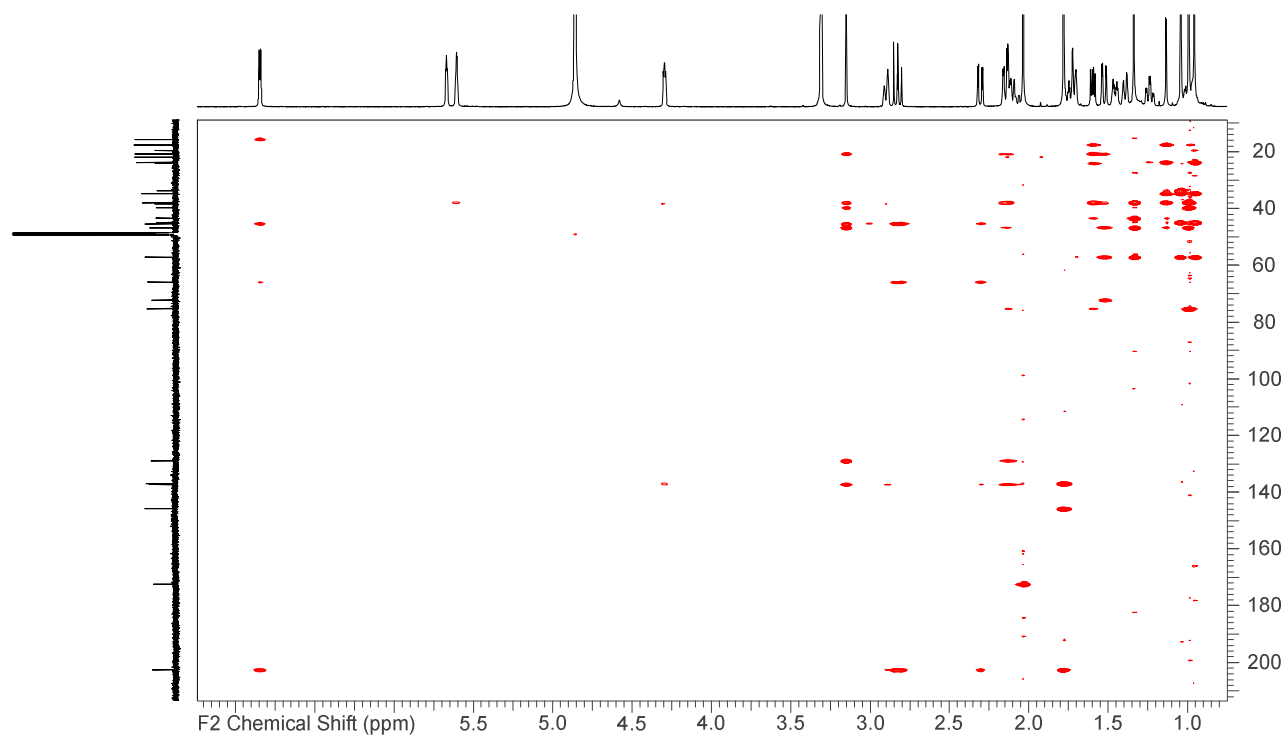

Figure S20 – NOESY NMR spectrum (600 MHz, CD<sub>3</sub>OD) of **3**

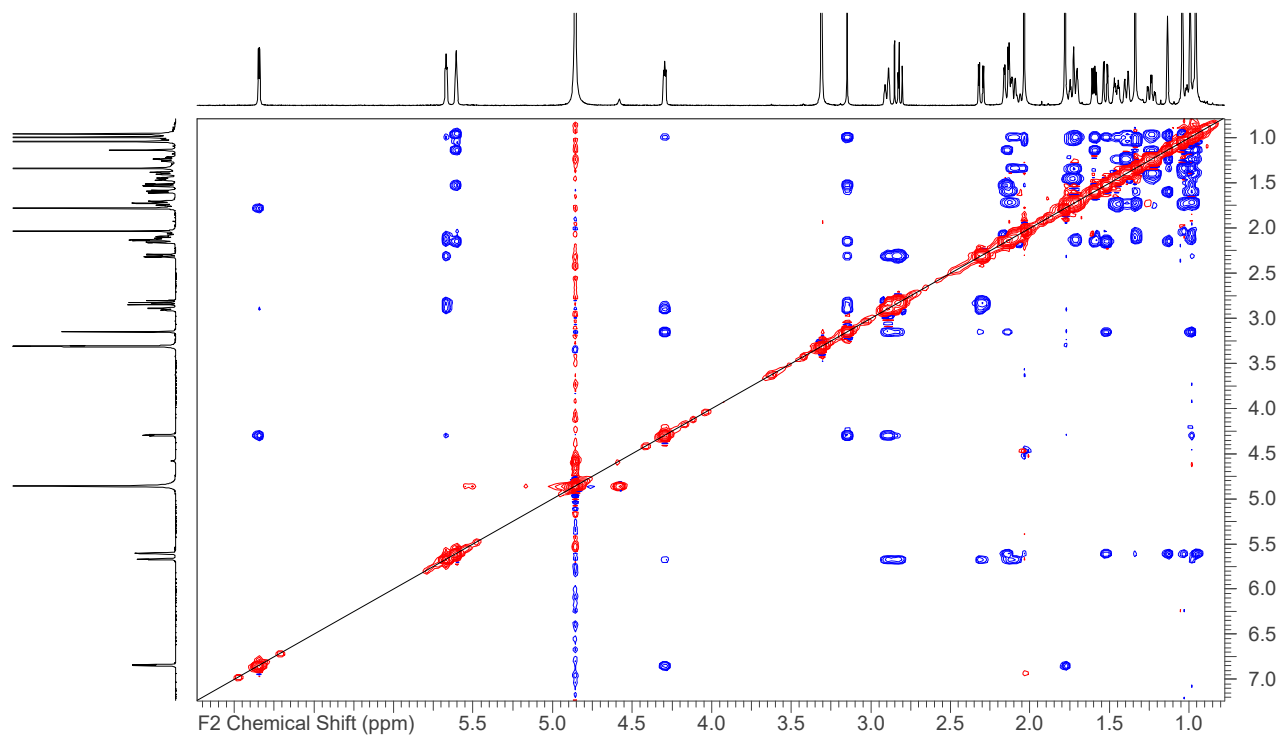

Figure S21 – HRESIMS analysis of **3**

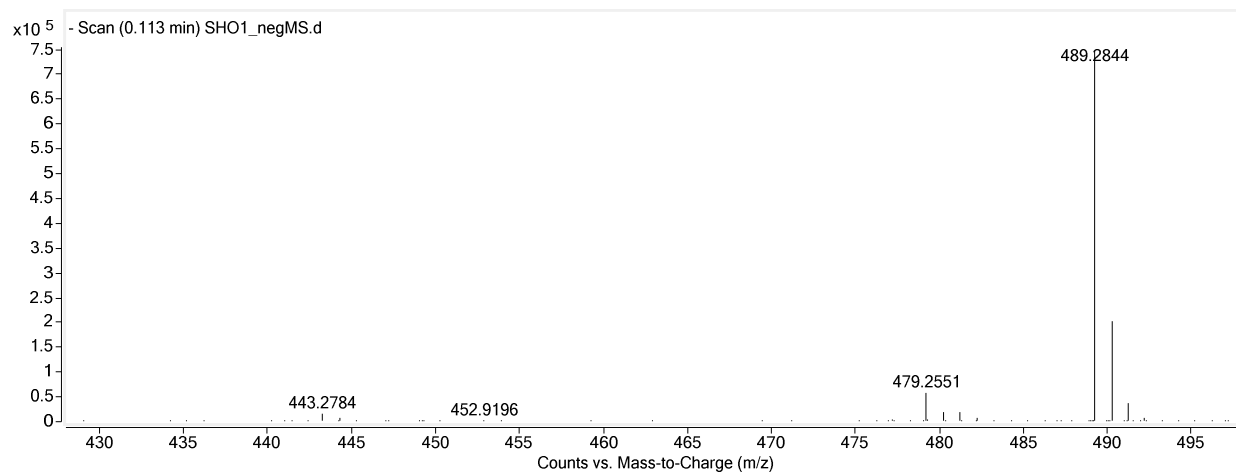

| Best | Name | Formula                                        | Score | Mass      | Mass (DB) | Mass (MFG) | Diff (ppm) |
|------|------|------------------------------------------------|-------|-----------|-----------|------------|------------|
| ☉    |      | C <sub>27</sub> H <sub>40</sub> O <sub>5</sub> | 94.28 | 444.28592 |           |            | 3.73       |

| Species   | Ion Formula | m/z      | Height   | Score (MFG) | Score (MS) | Score (mass) |
|-----------|-------------|----------|----------|-------------|------------|--------------|
| (M-H)-    |             | 443.2788 | 3357.4   |             | 84.82      | 88.61        |
| (M+Cl)-   |             | 479.2553 | 7024.7   |             | 79.29      | 87.03        |
| (M+HCOO)- |             | 489.2841 | 144546.5 |             | 94.28      | 88.52        |

| m/z      | m/z (Calc) | Diff (ppm) | Diff (mDa) | Height   | Height (Calc) | Height % |
|----------|------------|------------|------------|----------|---------------|----------|
| 489.2841 | 489.2858   | 3.34       | 1.6        | 144546.5 | 142738.5      | 100      |
| 490.2874 | 490.2892   | 3.57       | 1.7        | 43854.3  | 44280.7       | 30.3     |
| 491.2904 | 491.292    | 3.32       | 1.6        | 7405.7   | 8687.8        | 5.1      |
| 492.2938 | 492.2947   | 1.86       | 0.9        | 1216.8   | 1275.6        | 0.8      |
| 493.2936 | 493.2974   | 7.7        | 3.8        | 111.7    | 152.4         | 0.1      |

Table S4 – NMR data for suberitenone G (**4**) (500 ( $^1\text{H}$ ) and 150 ( $^{13}\text{C}$ ) MHz,  $\text{CD}_3\text{OD}$ ).

| pos | $\delta_{\text{C}}$ , type | $\delta_{\text{H}}$   | gCOSY                | gHMBC                          | NOESY            |
|-----|----------------------------|-----------------------|----------------------|--------------------------------|------------------|
| 1   | 64.7, CH                   | 4.14, br t (4.2)      | 2, 6                 | 3, 5                           | 5, 5', 23        |
| 2   | 145.5, CH                  | 6.80, dq (1.5, 5.6)   | 1, 21                | 1, 4, 6, 21                    | 6                |
| 3   | 136.8, C                   |                       |                      |                                |                  |
| 4   | 202.2, C                   |                       |                      |                                |                  |
| 5   | 37.7, $\text{CH}_2$        | 2.82, dd (16.2, 13.4) | 5', 6                | 1, 4, 6                        | 1, 8             |
| 5'  |                            | 2.18, dd (16.2, 3.6)  | 5, 6                 | 1, 4, 6, 7                     | 1, 8             |
| 6   | 38.8, CH                   | 3.39, m               | 1, 5, 5'             |                                | 2                |
| 7   | 135.7, C                   |                       |                      |                                |                  |
| 8   | 147.2, CH                  | 6.78, m               | 9                    | 6, 10                          | 5, 5'            |
| 9   | 24.6, $\text{CH}_2$        | 2.52, m               | 8, 10                | 7, 8, 10, 11                   | 16', 23, 24      |
| 10  | 54.7, CH                   | 1.71, o/l             | 9                    | 9, 11, 12, 16, 22, 23, 24      | 14, 16'          |
| 11  | 45.7, C                    |                       |                      |                                |                  |
| 12  | 39.4, $\text{CH}_2$        | 2.13, dd (15.5, 2.7)  | 12', 13              | 10, 11, 13, 14, 23             | 23               |
| 12' |                            | 1.69, o/l             | 12, 13               | 11, 22, 23                     | 14               |
| 13  | 71.3, CH                   | 5.61, q (3.2)         | 12, 12', 14          |                                | 20               |
| 14  | 56.5, CH                   | 1.13, m               | 13                   | 10, 15, 16, 18, 19, 20, 24, 25 | 10, 12', 20      |
| 15  | 39.0, C                    |                       |                      |                                |                  |
| 16  | 42.6, $\text{CH}_2$        | 1.76, o/l             | 16', 17, 17'         | 14, 18, 24                     |                  |
| 16' |                            | 0.98, m               | 16, 17, 17'          |                                | 9, 10            |
| 17  | 19.4, $\text{CH}_2$        | 1.77, o/l             | 16, 16', 18, 18'     | 16, 18                         |                  |
| 17' |                            | 1.49, m               | 16, 16', 17, 18, 18' |                                |                  |
| 18  | 44.9, $\text{CH}_2$        | 1.40, m               | 17, 17', 18'         |                                |                  |
| 18' |                            | 1.24, m               | 17, 17', 18          |                                |                  |
| 19  | 34.8, C                    |                       |                      |                                |                  |
| 20  | 33.5, $\text{CH}_3$        | 0.95, s               |                      | 14, 18, 19, 25                 | 13, 14           |
| 21  | 15.6, $\text{CH}_3$        | 1.79, s               | 2                    | 2, 3, 4                        |                  |
| 22  | 205.5, C                   |                       |                      |                                |                  |
| 23  | 19.6, $\text{CH}_3$        | 1.27, s               |                      | 10, 11, 12, 22                 | 1, 9, 12, 24, 27 |
| 24  | 18.1, $\text{CH}_3$        | 1.42, s               |                      | 10, 14, 15, 16                 | 9, 23, 25, 27    |
| 25  | 23.7, $\text{CH}_3$        | 1.04, s               |                      | 14, 18, 19, 20                 | 24, 27           |
| 26  | 172.0, C                   |                       |                      |                                |                  |
| 27  | 21.8, $\text{CH}_3$        | 2.04, s               |                      | 26                             | 23, 24, 25       |

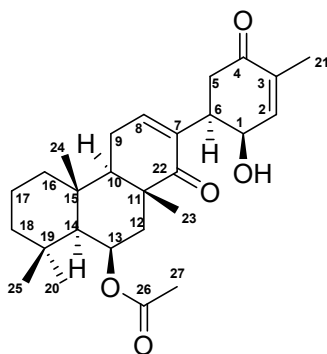

Figure S22 –  $^1\text{H}$  NMR spectrum (500 MHz,  $\text{CD}_3\text{OD}$ ) of **4**

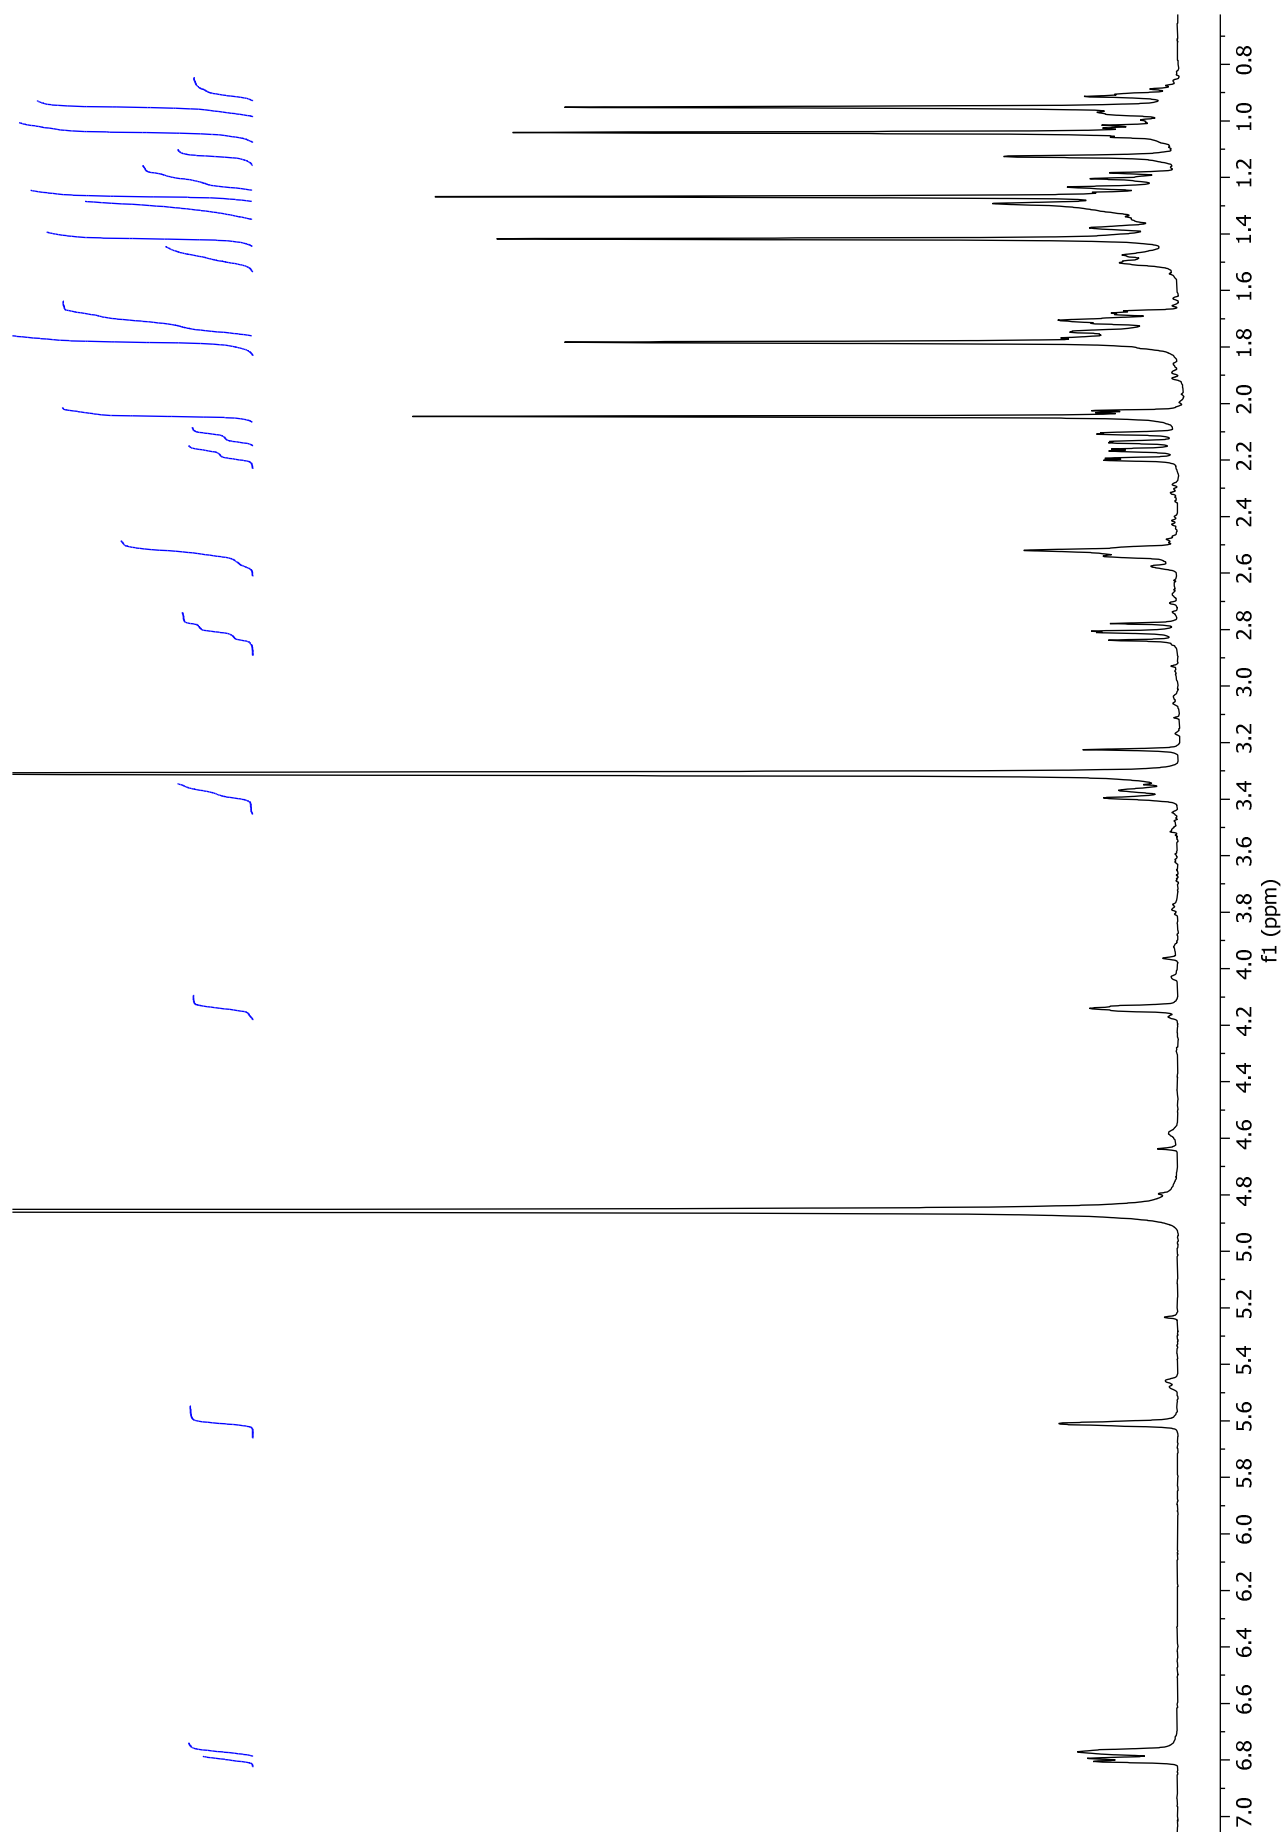

Figure S23 –  $^{13}\text{C}$  NMR spectrum (150 MHz,  $\text{CD}_3\text{OD}$ ) of **4** (formic acid impurity  $\delta_{\text{C}}$  170.3)

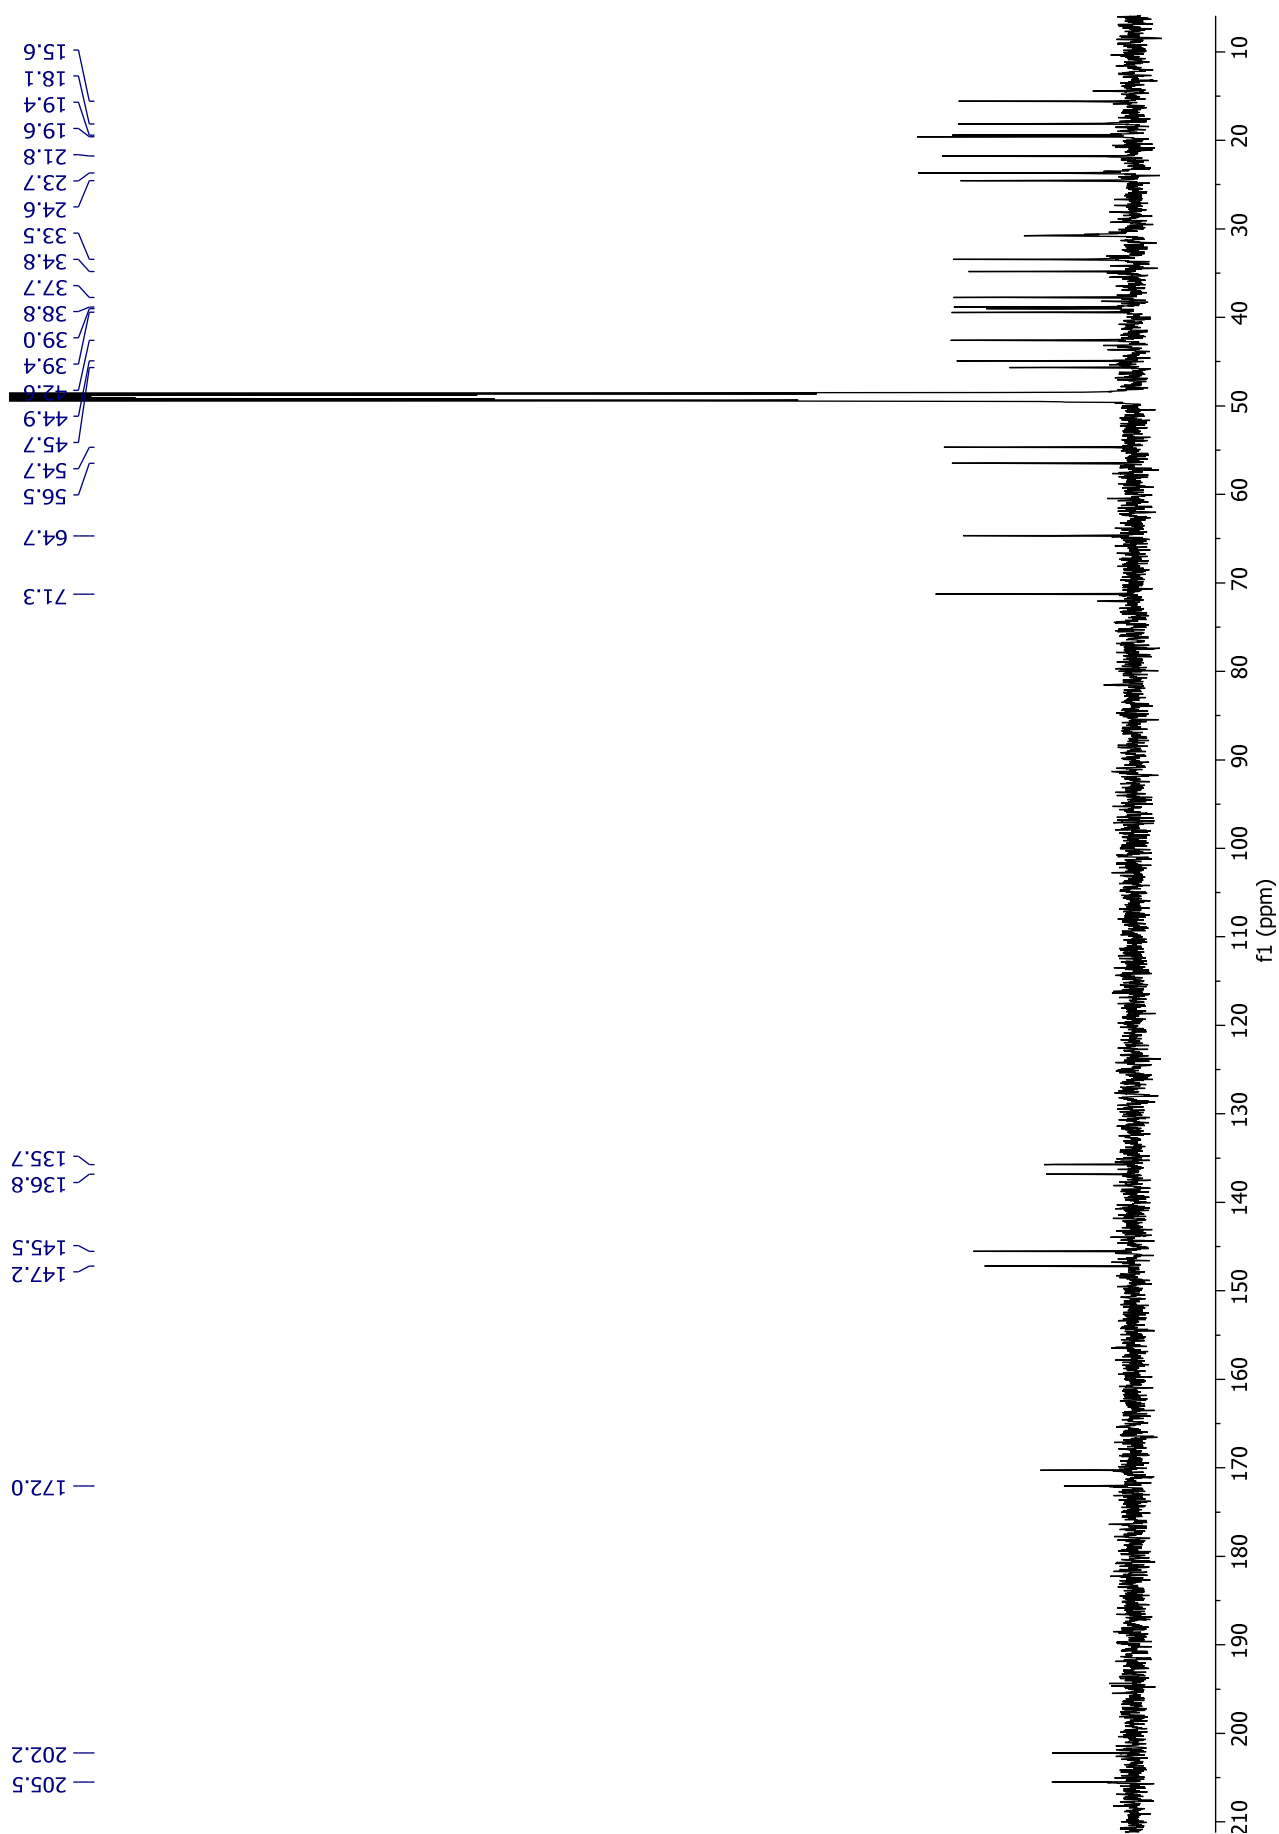

Figure S24 – COSY NMR spectrum (500 MHz, CD<sub>3</sub>OD) of **4**

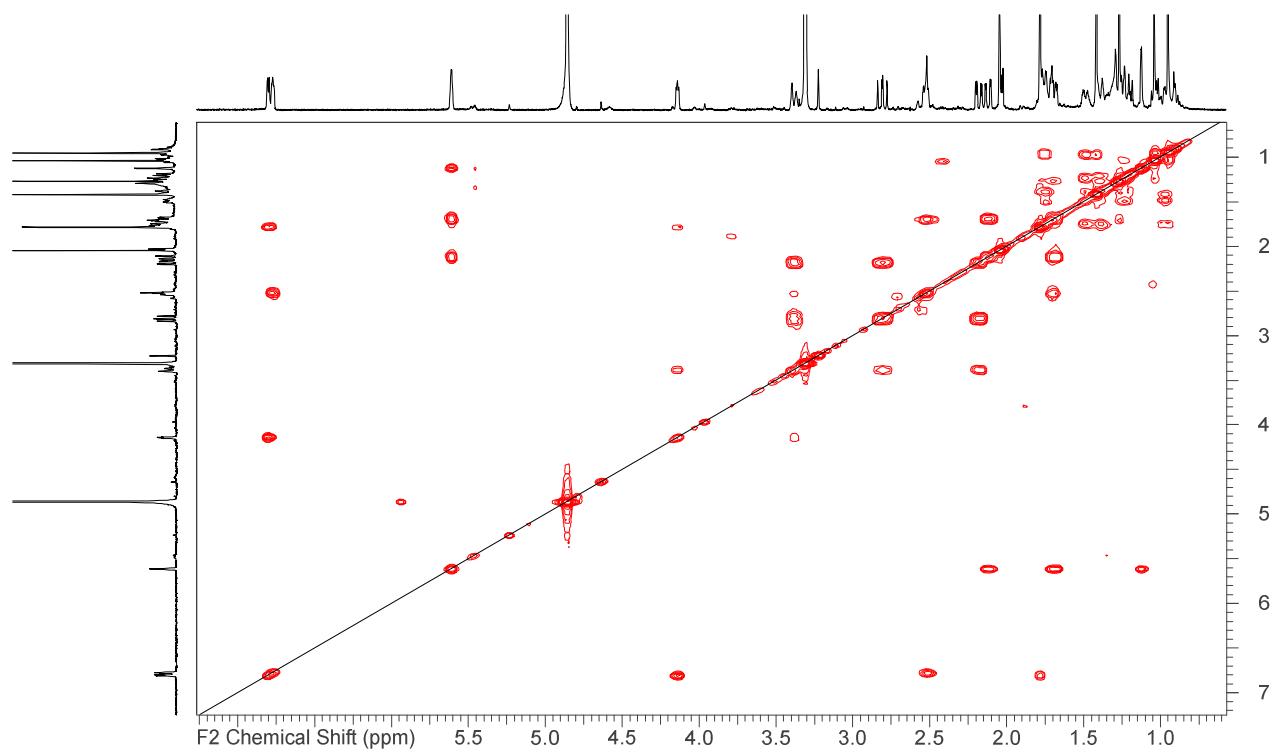

Figure S25 – HSQC NMR spectrum (500 MHz, CD<sub>3</sub>OD) of **4**

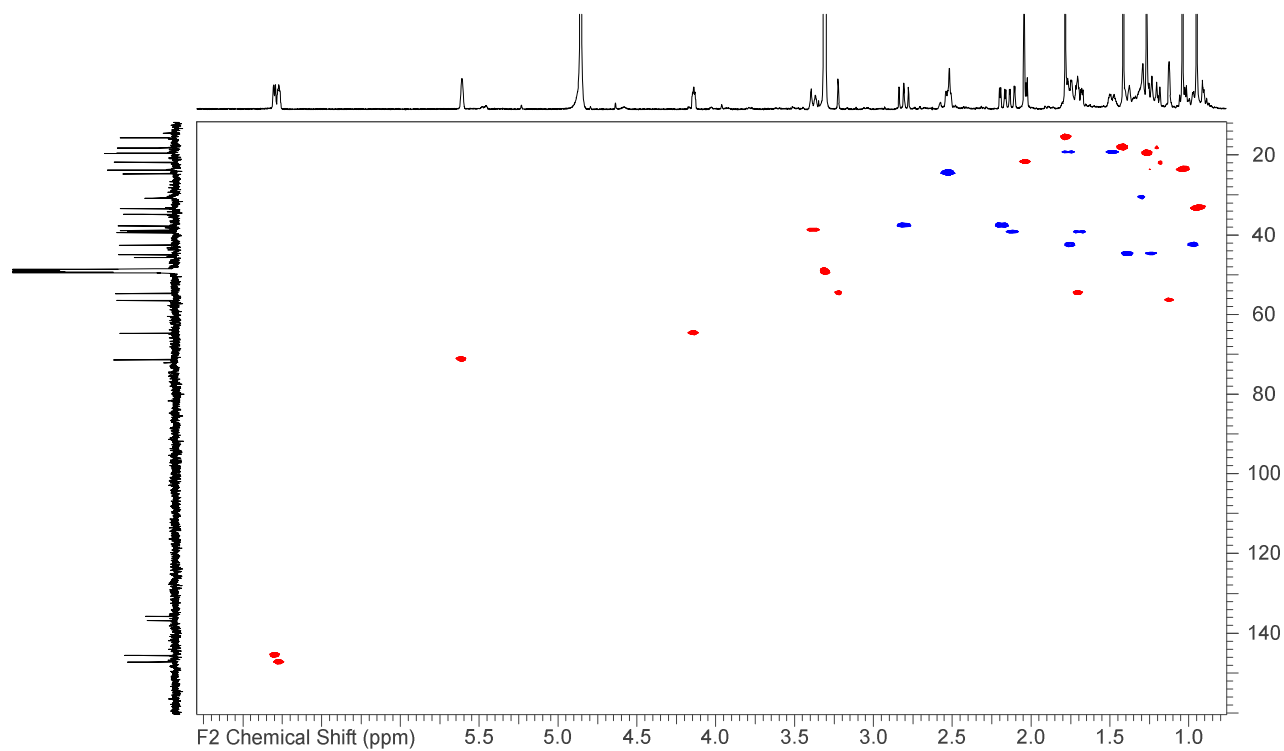

Figure S26 – HMBC NMR spectrum (500 MHz, CD<sub>3</sub>OD) of **4**

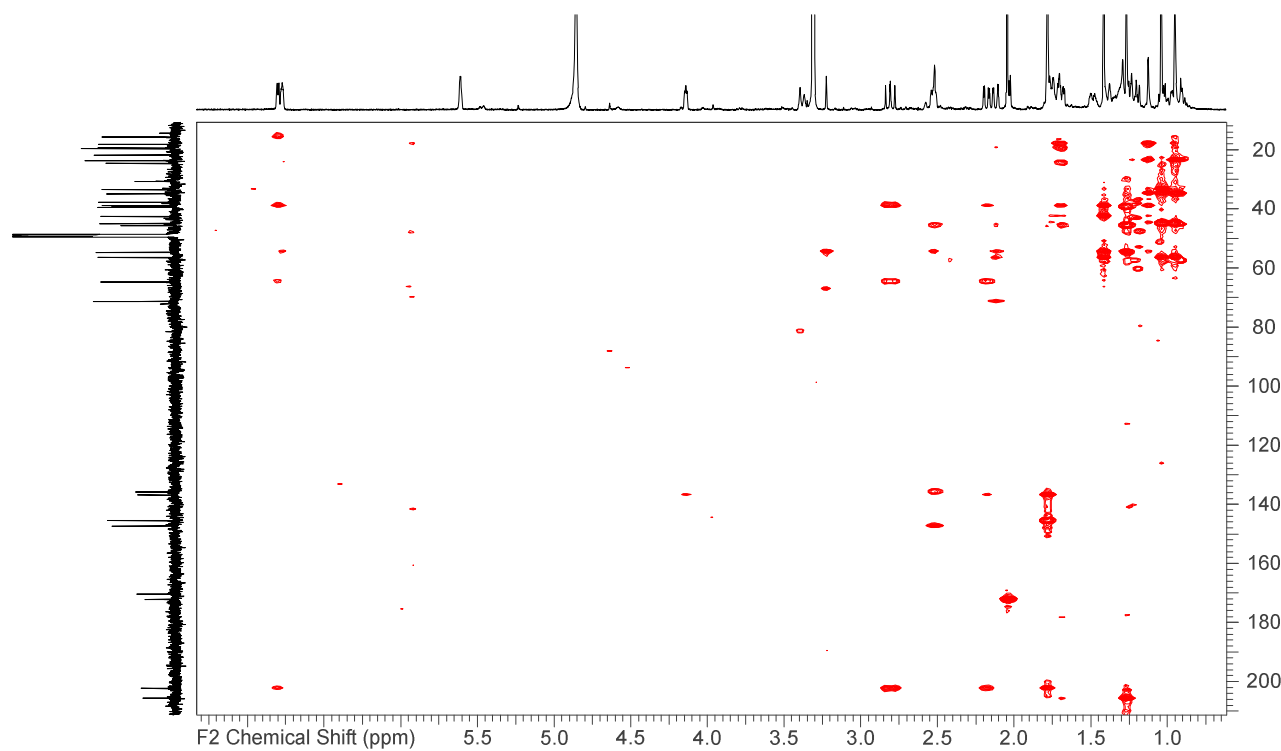

Figure S27 – NOESY NMR spectrum (600 MHz, CD<sub>3</sub>OD) of **4**

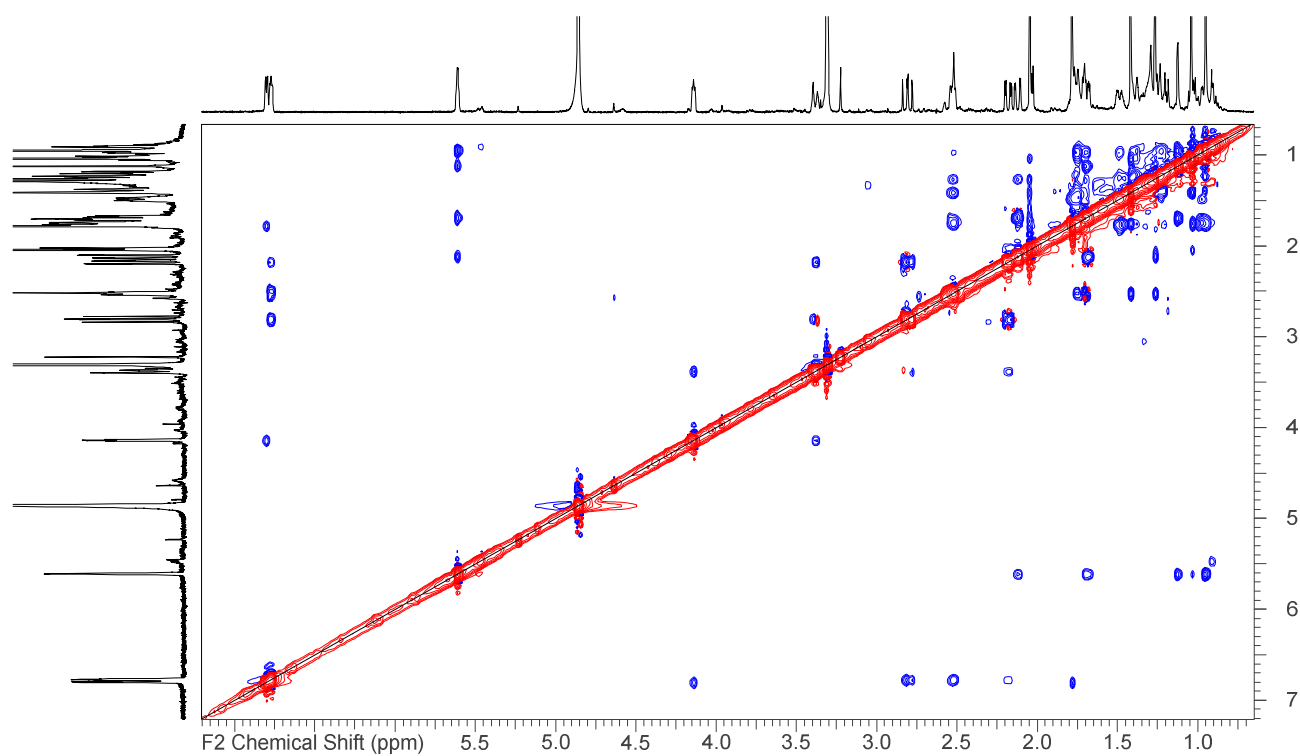



Figure S28 – HRESIMS analysis of **4**

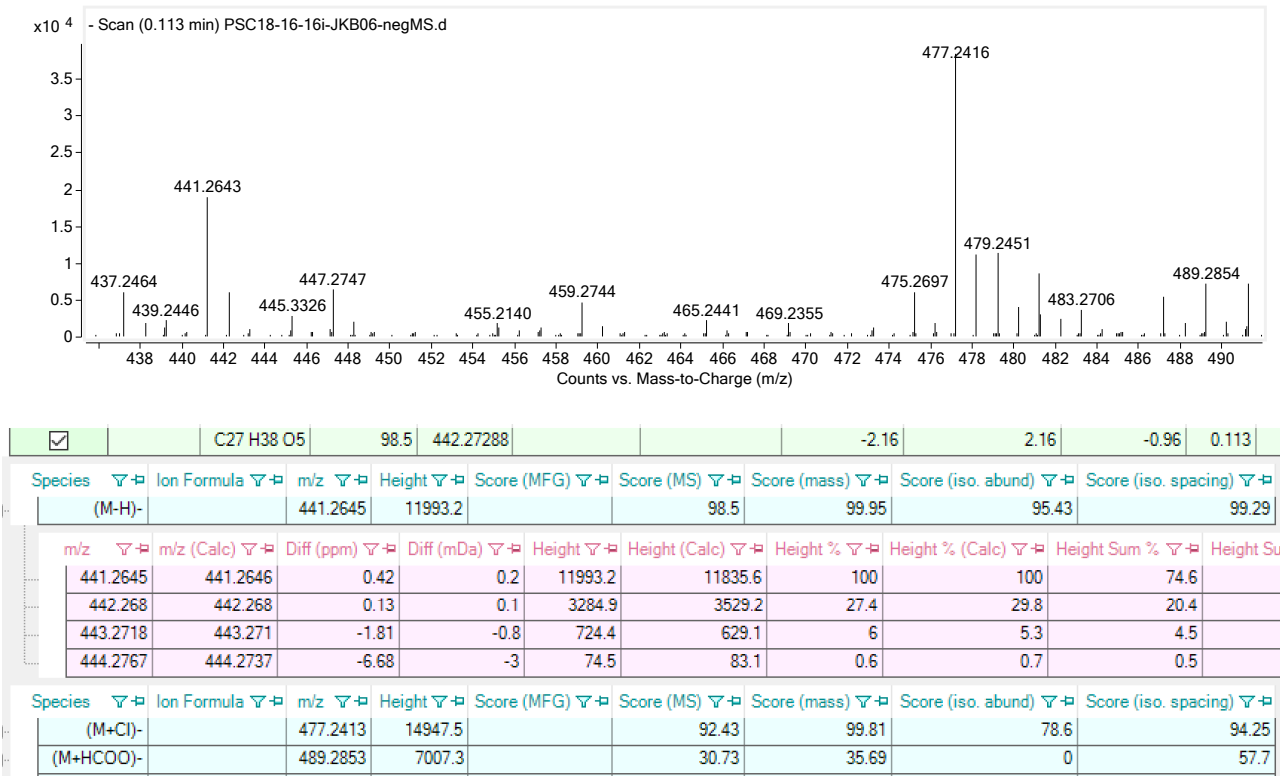

Table S5 – NMR data for suberitenone H (**5**) (500 ( $^1\text{H}$ ) and 150 ( $^{13}\text{C}$ ) MHz,  $\text{CD}_3\text{OD}$ ).

| pos | $\delta_{\text{C}}$ , type | $\delta_{\text{H}}$  | gCOSY                 | gHMBC                              | NOESY              |
|-----|----------------------------|----------------------|-----------------------|------------------------------------|--------------------|
| 1   | 66.6, CH                   | 4.46, br t (3.3)     | 2, 6                  | 2, 3, 5                            | 22', 28            |
| 2   | 88.6, CH                   | 3.52, t (3.6)        | 1, 3                  | 1, 3, 4, 6, 21, 28                 | 21, 28             |
| 3   | 44.6, CH                   | 3.03, m              | 2, 21                 | 2, 4, 21                           | 5                  |
| 4   | 214.6, C                   |                      |                       |                                    |                    |
| 5   | 37.4, $\text{CH}_2$        | 2.65, t (13.7)       | 5', 6                 | 1, 4, 6, 7                         | 3                  |
| 5'  |                            | 2.23, dd (4.7, 13.8) | 5, 6                  | 1, 3, 4, 6                         | 8, 8'              |
| 6   | 48.3, CH                   | 1.81, o/l            | 1, 5, 5', 8           | 5, 7, 8                            | 8', 28             |
| 7   | 75.1, C                    |                      |                       |                                    |                    |
| 8   | 38.7, $\text{CH}_2$        | 1.91, o/l            | 6, 8', 9, 9'          | 10, 22                             | 5'                 |
| 8'  |                            | 1.21, o/l            | 8, 9, 9'              |                                    | 5', 6              |
| 9   | 18.0, $\text{CH}_2$        | 1.66, td (12.8, 3.4) | 8, 8', 9', 10         | 10, 11, 15                         |                    |
| 9'  |                            | 1.57, m              | 8, 8', 9, 10          | 10, 11, 15                         | 16                 |
| 10  | 59.7, CH                   | 0.99, dd (12.3, 2.5) | 9, 9'                 |                                    | 12', 14, 22'       |
| 11  | 35.5, C                    |                      |                       |                                    |                    |
| 12  | 48.1, $\text{CH}_2$        | 1.88, o/l            | 12', 13               | 10, 11, 13, 14, 22, 23             |                    |
| 12' |                            | 1.32, m              | 12, 13                |                                    | 10, 14             |
| 13  | 72.3, CH                   | 5.48, br q (3.2)     | 12, 12', 14           | 11, 15                             | 20                 |
| 14  | 57.7, CH                   | 1.14, br s           | 13                    | 10, 12, 15, 16, 18, 19, 20, 24, 25 | 10, 12', 16'       |
| 15  | 38.3, C                    |                      |                       |                                    |                    |
| 16  | 43.0, $\text{CH}_2$        | 1.77, o/l            | 16', 17, 17'          | 10, 14, 15, 24                     | 9'                 |
| 16' |                            | 0.92, o/l            | 16, 17, 17'           |                                    | 14                 |
| 17  | 19.7, $\text{CH}_2$        | 1.77, o/l            | 16, 16', 17', 18, 18' | 15                                 | 24, 25             |
| 17' |                            | 1.47, m              | 16, 16', 17, 18, 18'  |                                    |                    |
| 18  | 45.4, $\text{CH}_2$        | 1.37, o/l            | 17, 17', 18'          |                                    | 20, 25             |
| 18' |                            | 1.23, o/l            | 17, 17', 18           |                                    |                    |
| 19  | 35.0, C                    |                      |                       |                                    |                    |
| 20  | 33.3, $\text{CH}_3$        | 0.91, s              |                       | 14, 18, 19, 25                     | 13, 18             |
| 21  | 10.4, $\text{CH}_3$        | 1.02, d (6.8)        | 3                     | 2, 3, 4                            | 2, 28              |
| 22  | 55.3, $\text{CH}_2$        | 1.81, o/l            |                       | 7, 8, 10, 11, 23                   | 23                 |
| 22' |                            | 1.15/ o/l            |                       |                                    | 1, 10              |
| 23  | 23.4, $\text{CH}_3$        | 1.37, s              |                       | 10, 11, 12, 22                     | 22, 25, 27         |
| 24  | 17.9, $\text{CH}_3$        | 1.23, s              |                       | 10, 14, 15, 16                     | 17, 25, 27         |
| 25  | 23.7, $\text{CH}_3$        | 1.04, s              |                       | 14, 18, 19, 20                     | 17, 18, 23, 24, 27 |
| 26  | 172.3, C                   |                      |                       |                                    |                    |
| 27  | 21.8, $\text{CH}_3$        | 2.03, s              |                       | 26                                 | 23, 24, 25         |
| 28  | 59.1, $\text{CH}_3$        | 3.35, s              |                       | 2                                  | 1, 2, 6, 21        |

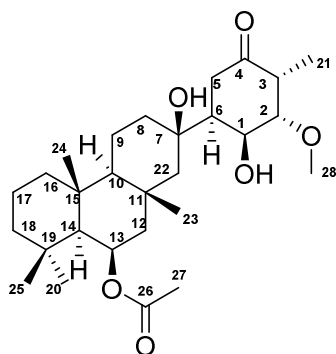

Figure S29 –  $^1\text{H}$  NMR spectrum (500 MHz,  $\text{CD}_3\text{OD}$ ) of **5**

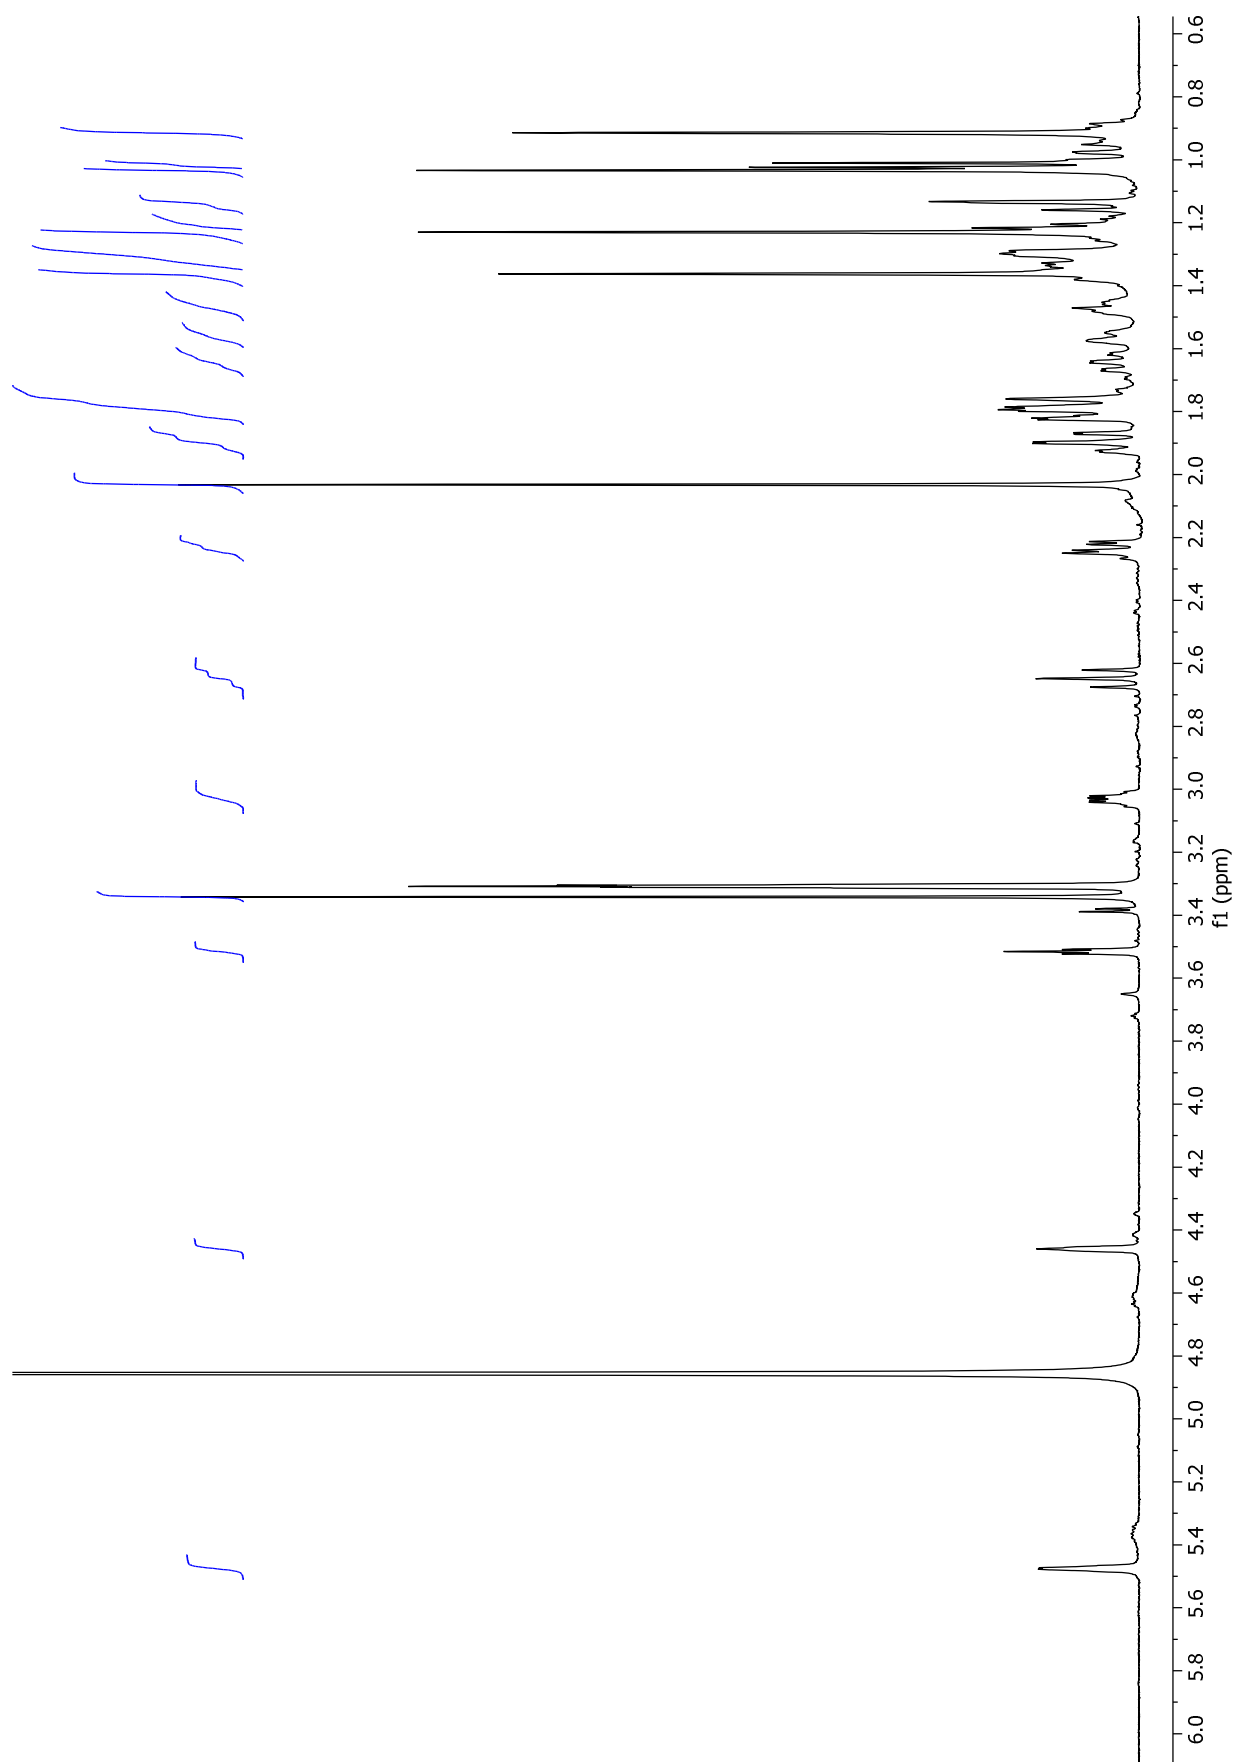

Figure S30 –  $^{13}\text{C}$  NMR spectrum (150 MHz,  $\text{CD}_3\text{OD}$ ) of **5**

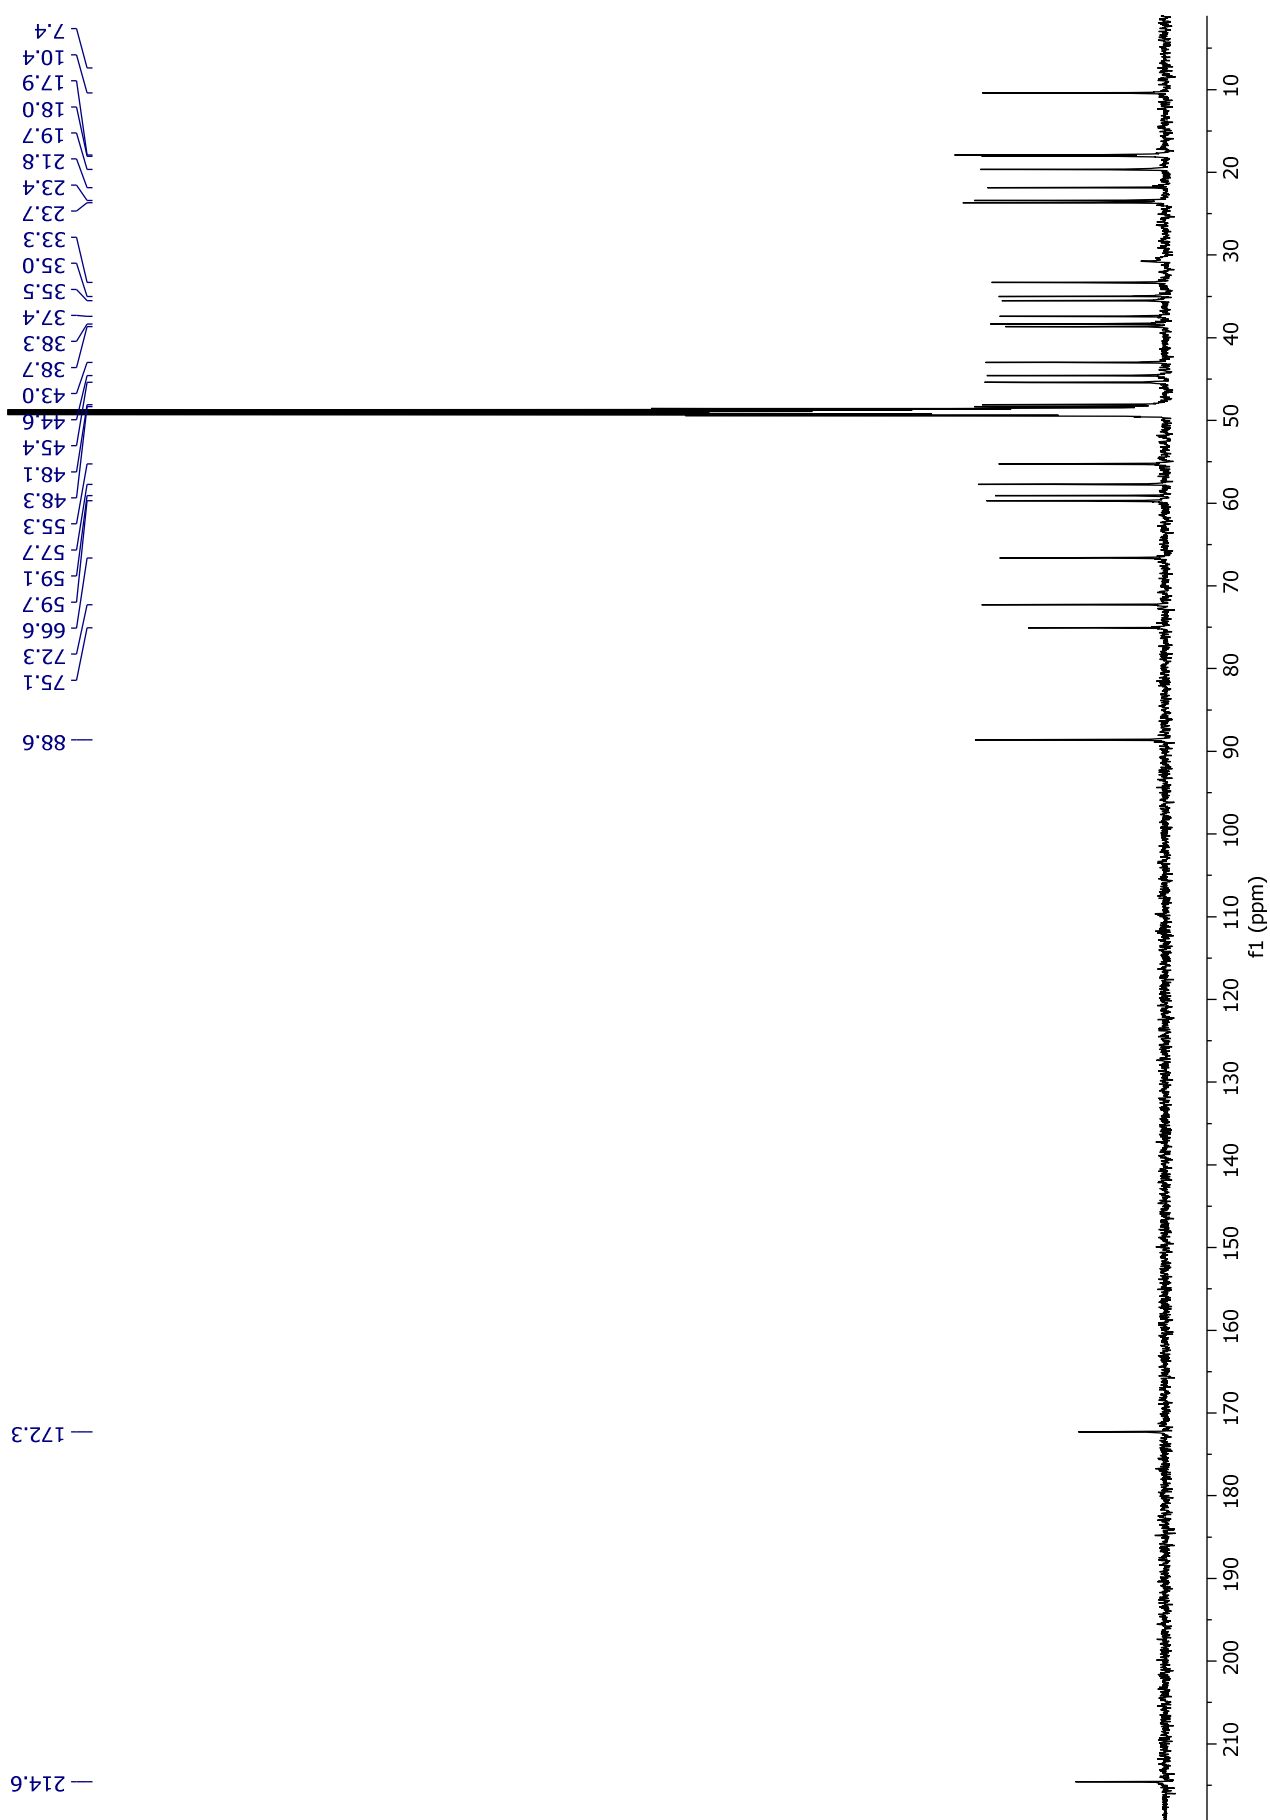

Figure S31 – COSY NMR spectrum (500 MHz, CD<sub>3</sub>OD) of **5**

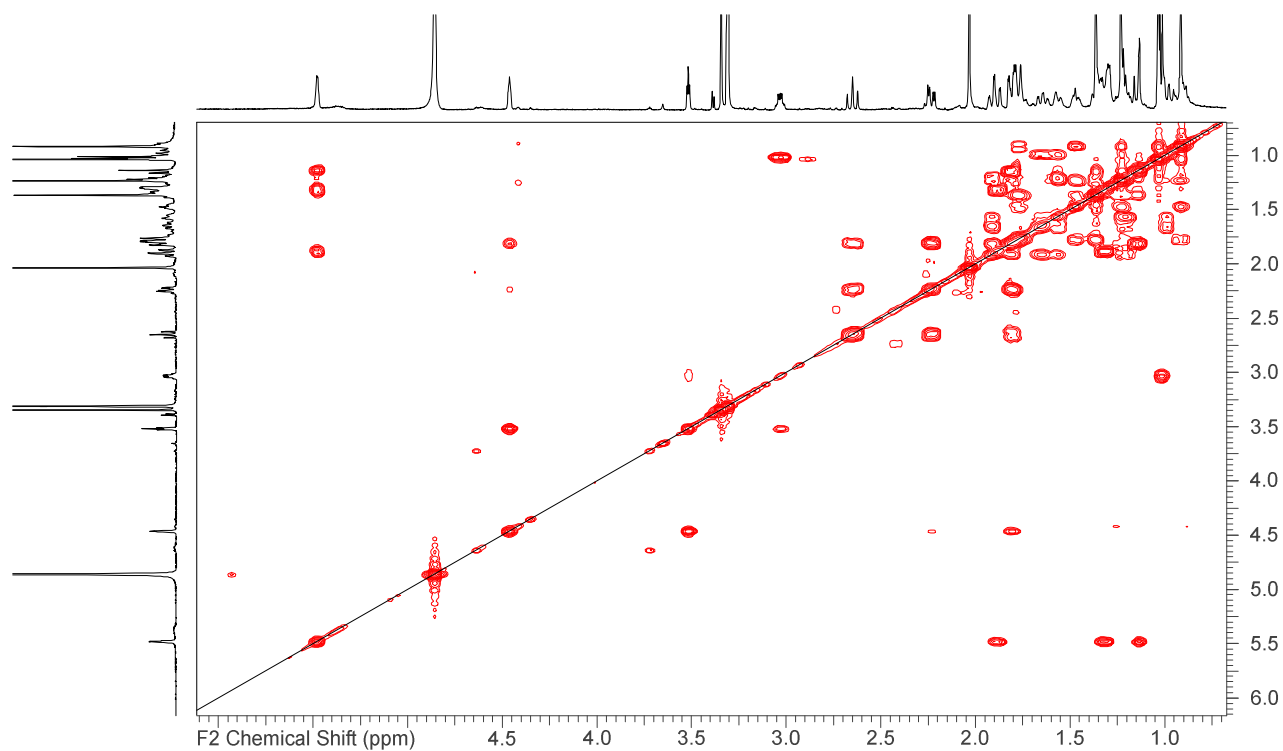

Figure S32 – HSQC NMR spectrum (500 MHz, CD<sub>3</sub>OD) of **5**

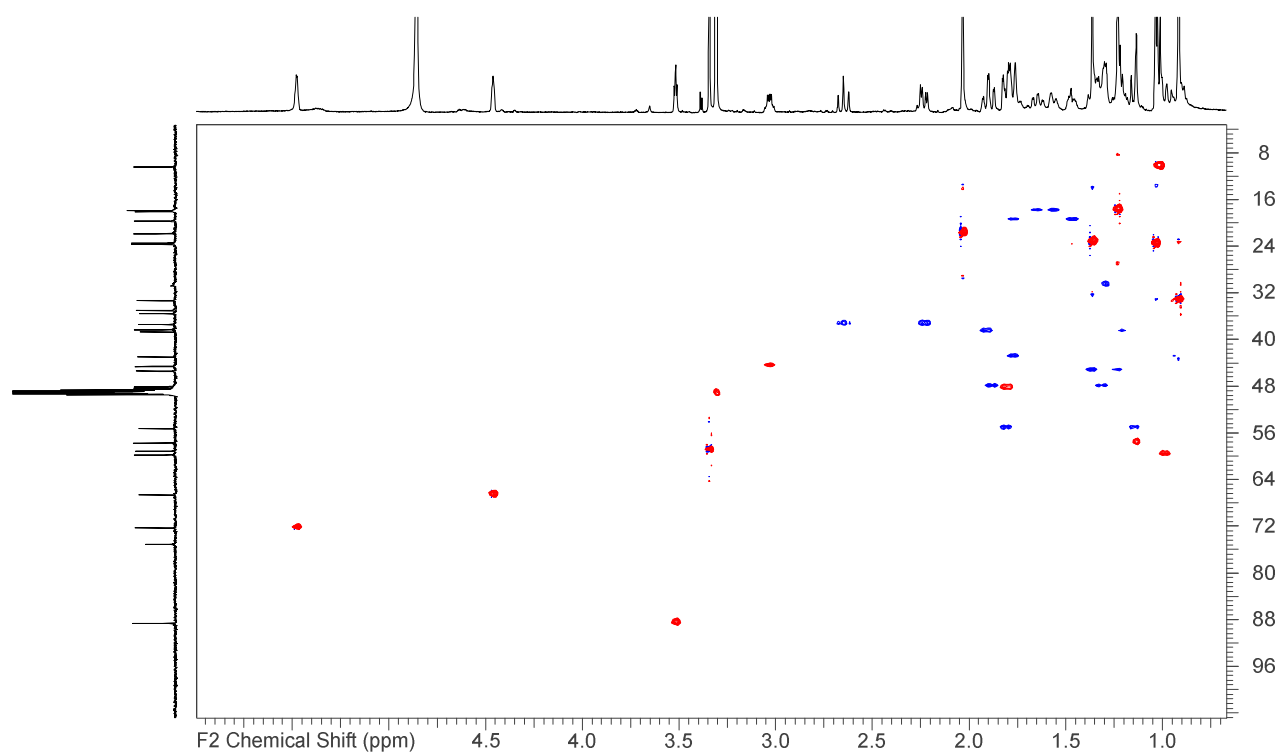

Figure S33 – HMBC NMR spectrum (500 MHz, CD<sub>3</sub>OD) of **5**

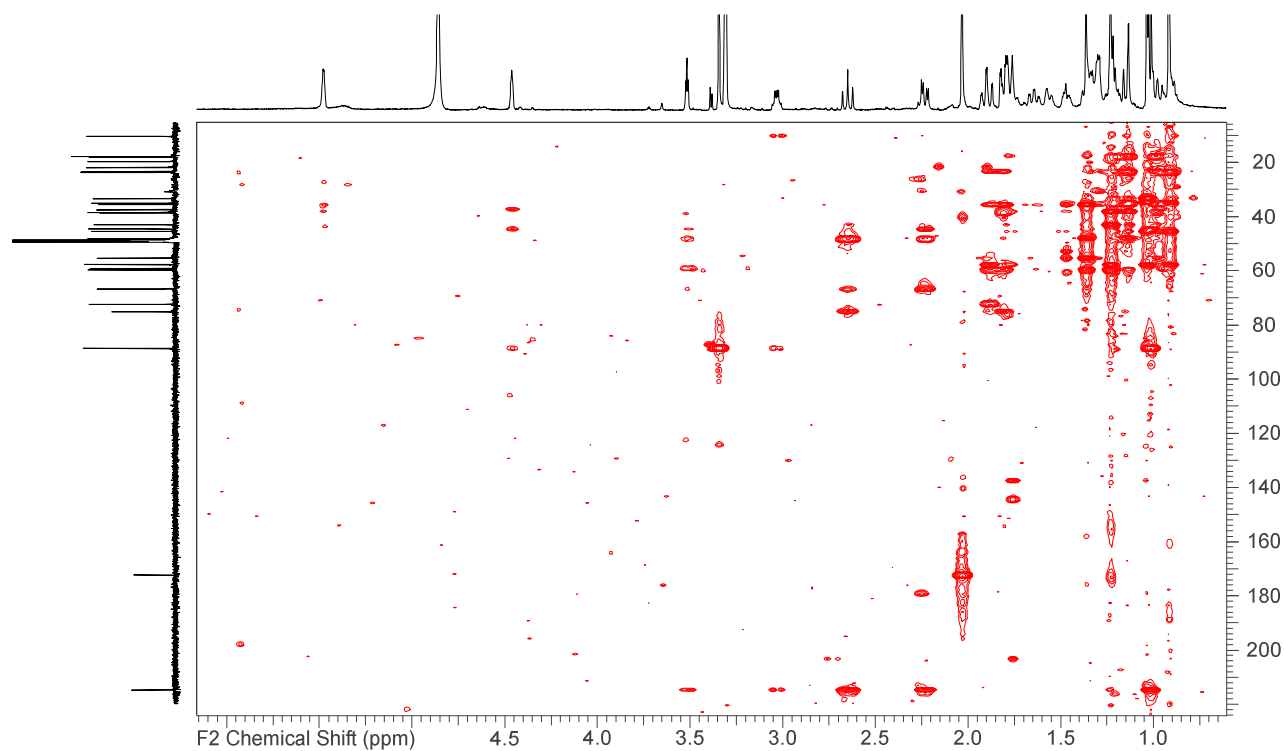

Figure S34 – NOESY NMR spectrum (600 MHz, CD<sub>3</sub>OD) of **5**

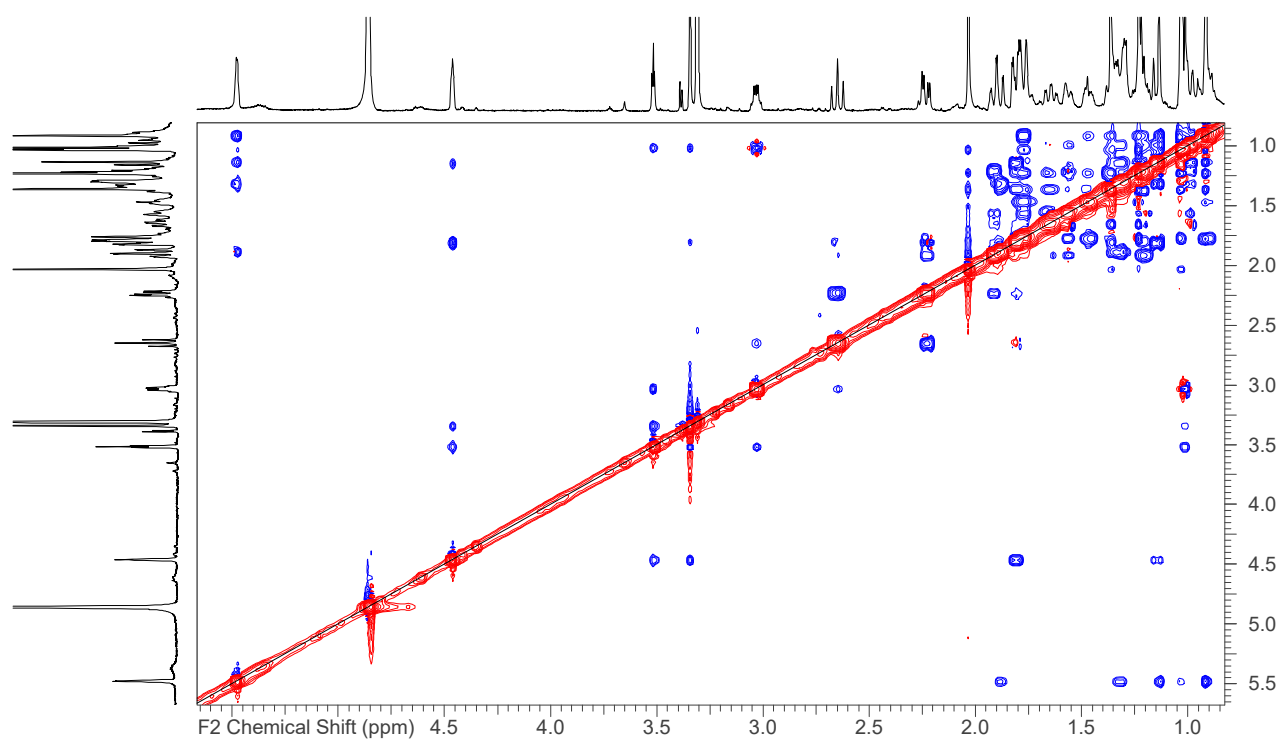

Figure S35 – HRESIMS analysis of **5**

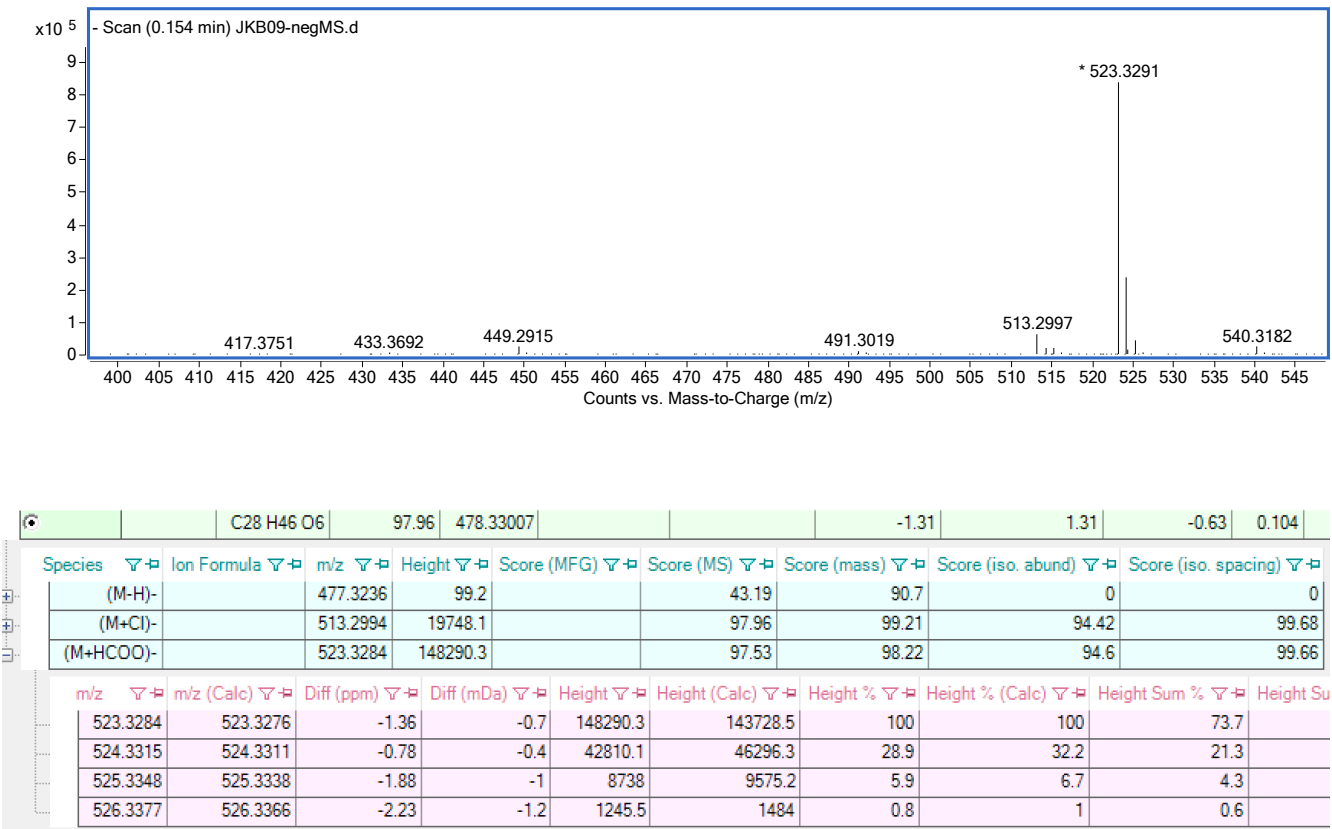

Table S6 – NMR data for suberitenone I (**6**) (500 (<sup>1</sup>H) and 150 (<sup>13</sup>C) MHz, CD<sub>3</sub>OD).

| pos | δ <sub>C</sub> , type | δ <sub>H</sub>       | gCOSY                 | gHMBC                                | NOESY              |
|-----|-----------------------|----------------------|-----------------------|--------------------------------------|--------------------|
| 1   | 71.0, CH              | 4.17 br t (2.7)      | 2, 6                  | 2, 5, 7                              | 5                  |
| 2   | 79.9, CH              | 4.03, br s           | 1, 3                  | 1, 4, 6, 8                           | 21                 |
| 3   | 48.1, CH              | 2.64, m              | 2, 21                 |                                      |                    |
| 4   | 212.8, C              |                      |                       |                                      |                    |
| 5   | 46.7, CH <sub>2</sub> | 2.83, dd (16.2, 5.2) | 5', 6                 | 1, 4, 6, 7                           | 1                  |
| 5'  |                       | 2.30, dd (16.2, 2.5) | 5', 6                 | 1, 4                                 | 8                  |
| 6   | 45.5, CH              | 2.68, m              | 1, 5, 5'              |                                      | 22                 |
| 7   | 132.0, C              |                      |                       |                                      |                    |
| 8   | 70.8, CH              | 3.79, dd (9.4, 6.6)  | 9, 9'                 | 7, 9, 22                             | 5', 10, 21         |
| 9a  | 26.0, CH <sub>2</sub> | 1.90, o/l            | 8, 9'                 | 7, 8, 10, 11, 15                     | 16                 |
| 9'  |                       | 1.67, td (12.4, 9.5) | 8, 9, 10              | 8, 10, 11                            | 23                 |
| 10  | 55.1, CH              | 1.13, o/l            | 9'                    | 8, 9, 11, 12, 14, 15, 16, 22, 23, 24 | 8, 12', 22         |
| 11  | 37.1, C               |                      |                       |                                      |                    |
| 12  | 44.3, CH <sub>2</sub> | 1.88, o/l            | 12', 13               | 10, 11, 13, 14                       | 22, 23             |
| 12' |                       | 1.41, dd (14.6, 3.7) | 12, 13                | 11, 22                               | 10, 14, 22         |
| 13  | 72.1, CH              | 5.49, q (3.1)        | 12, 12', 14           |                                      | 20                 |
| 14  | 57.7, CH              | 1.12, o/l            | 13                    | 10, 12, 15, 16, 19, 24               | 12', 16', 20       |
| 15  | 38.0, C               |                      |                       |                                      |                    |
| 16  | 42.6, CH <sub>2</sub> | 1.74, o/l            | 16', 17, 17'          | 14, 18                               | 9                  |
| 16' |                       | 0.85, td (13.1, 3.9) | 16, 17, 17'           | 10, 15, 17, 24                       | 14                 |
| 17  | 19.5, CH <sub>2</sub> | 1.78, o/l            | 16, 16', 17', 18, 18' |                                      |                    |
| 17' |                       | 1.49, m              | 16, 16', 17, 18, 18'  |                                      |                    |
| 18  | 45.3, CH <sub>2</sub> | 1.36, m              | 17, 17', 18'          |                                      | 20, 25             |
| 18' |                       | 1.23, o/l            | 17, 17', 18'          |                                      |                    |
| 19  | 35.0, C               |                      | 17, 17', 18           |                                      |                    |
| 20  | 33.1, CH <sub>3</sub> | 0.91, s              |                       | 14, 18, 19, 24                       | 13, 14, 18         |
| 21  | 11.6, CH <sub>3</sub> | 1.19, d (6.8)        |                       | 2, 3, 4                              | 2, 8               |
| 22  | 140.9, CH             | 5.24, s              |                       | 6, 8, 10, 11, 12, 23                 | 10, 23, 12, 12', 6 |
| 23  | 23.7, CH <sub>3</sub> | 1.26, s              |                       | 10, 11, 12, 22                       | 9', 12, 22, 25, 27 |
| 24  | 18.1, CH <sub>3</sub> | 1.24, s              |                       | 10, 14, 15, 16                       | 25, 27             |
| 25  | 23.5, CH <sub>3</sub> | 1.03, s              |                       | 14, 18, 19, 20                       | 18, 23, 24, 27     |
| 26  | 172.1, C              |                      |                       |                                      |                    |
| 27  | 21.8, CH <sub>3</sub> | 2.04, s              |                       | 26                                   | 23, 24, 25         |

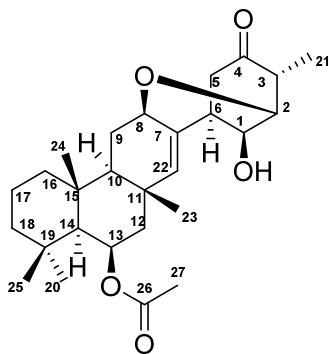



Table S7 – Assigned NMR data for compound **7** (500 ( $^1\text{H}$ ) and 150 ( $^{13}\text{C}$ ) MHz,  $\text{CD}_3\text{OD}$ ) using correlations observed when acquiring data on **6**.

| pos | $\delta_{\text{C}}$ , type | $\delta_{\text{H}}$   | gHMBC            | NOESY |
|-----|----------------------------|-----------------------|------------------|-------|
| 1   | 64.4, CH                   | 4.38, br t (4.3)      |                  |       |
| 2   | 145.4, CH                  | 6.84, dd (5.6, 1.3)   | 4, 6, 21         |       |
| 3   | 137.1, C                   |                       |                  |       |
| 4   | 202.7, C                   |                       |                  |       |
| 5   | 37.6, $\text{CH}_2$        | 2.72, dd (16.3, 13.7) |                  |       |
| 5'  |                            | 2.21, dd (16.2, 3.6)  |                  |       |
| 6   | 40.5, CH                   | 3.14, m               |                  |       |
| 7   | 135.9, C                   |                       |                  |       |
| 8   | 70.3, CH                   | 4.30, m               | 7, 22            | 10    |
| 9a  | 29.4, $\text{CH}_2$        | 2.11, dd (12.5, 7.8)  | 7                |       |
| 9'  |                            | 1.59, o/l             |                  |       |
| 10  | 54.5, CH                   | 1.37, o/l             |                  | 8     |
| 11  | 36.7, C                    |                       |                  |       |
| 12  | 44.8, $\text{CH}_2$        | 1.89, o/l             |                  |       |
| 12' |                            | 1.48, o/l             |                  |       |
| 13  | 72.2, CH                   | 5.50, q (2.3)         |                  |       |
| 21  | 15.6, $\text{CH}_3$        | 1.78, s               | 2,3,4            |       |
| 22  | 140.1, $\text{CH}_3$       | 5.11, s               | 6, 8, 10, 11, 12 |       |

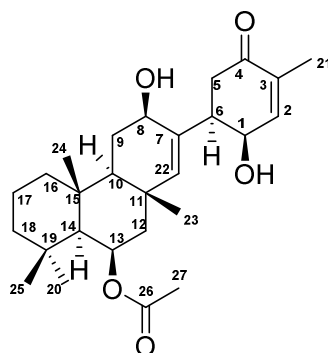

Figure S36 –  $^1\text{H}$  NMR spectrum (600 MHz,  $\text{CD}_3\text{OD}$ ) of **6**

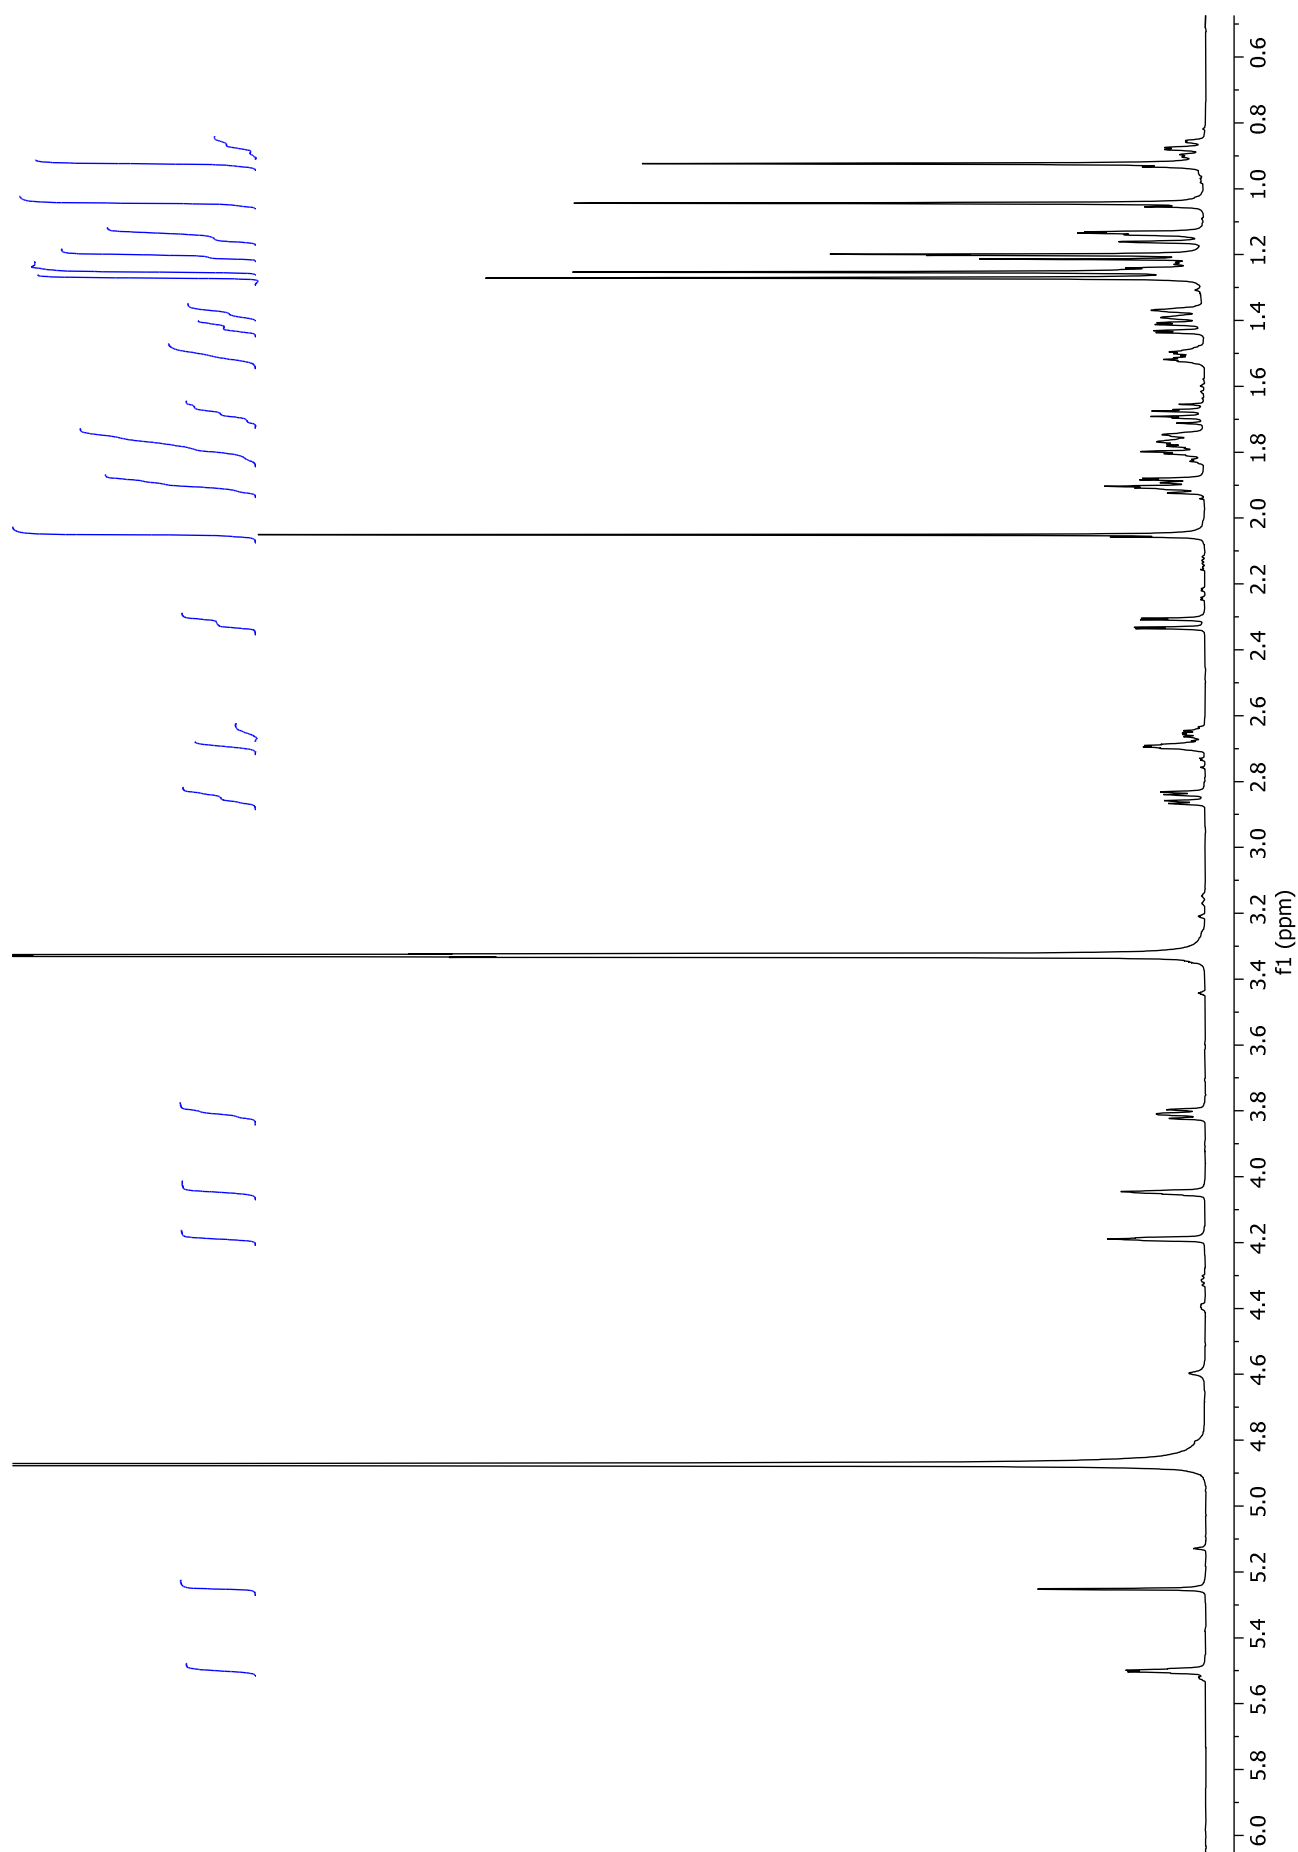

Figure S37 –  $^{13}\text{C}$  NMR spectrum (150 MHz,  $\text{CD}_3\text{OD}$ ) of **6**

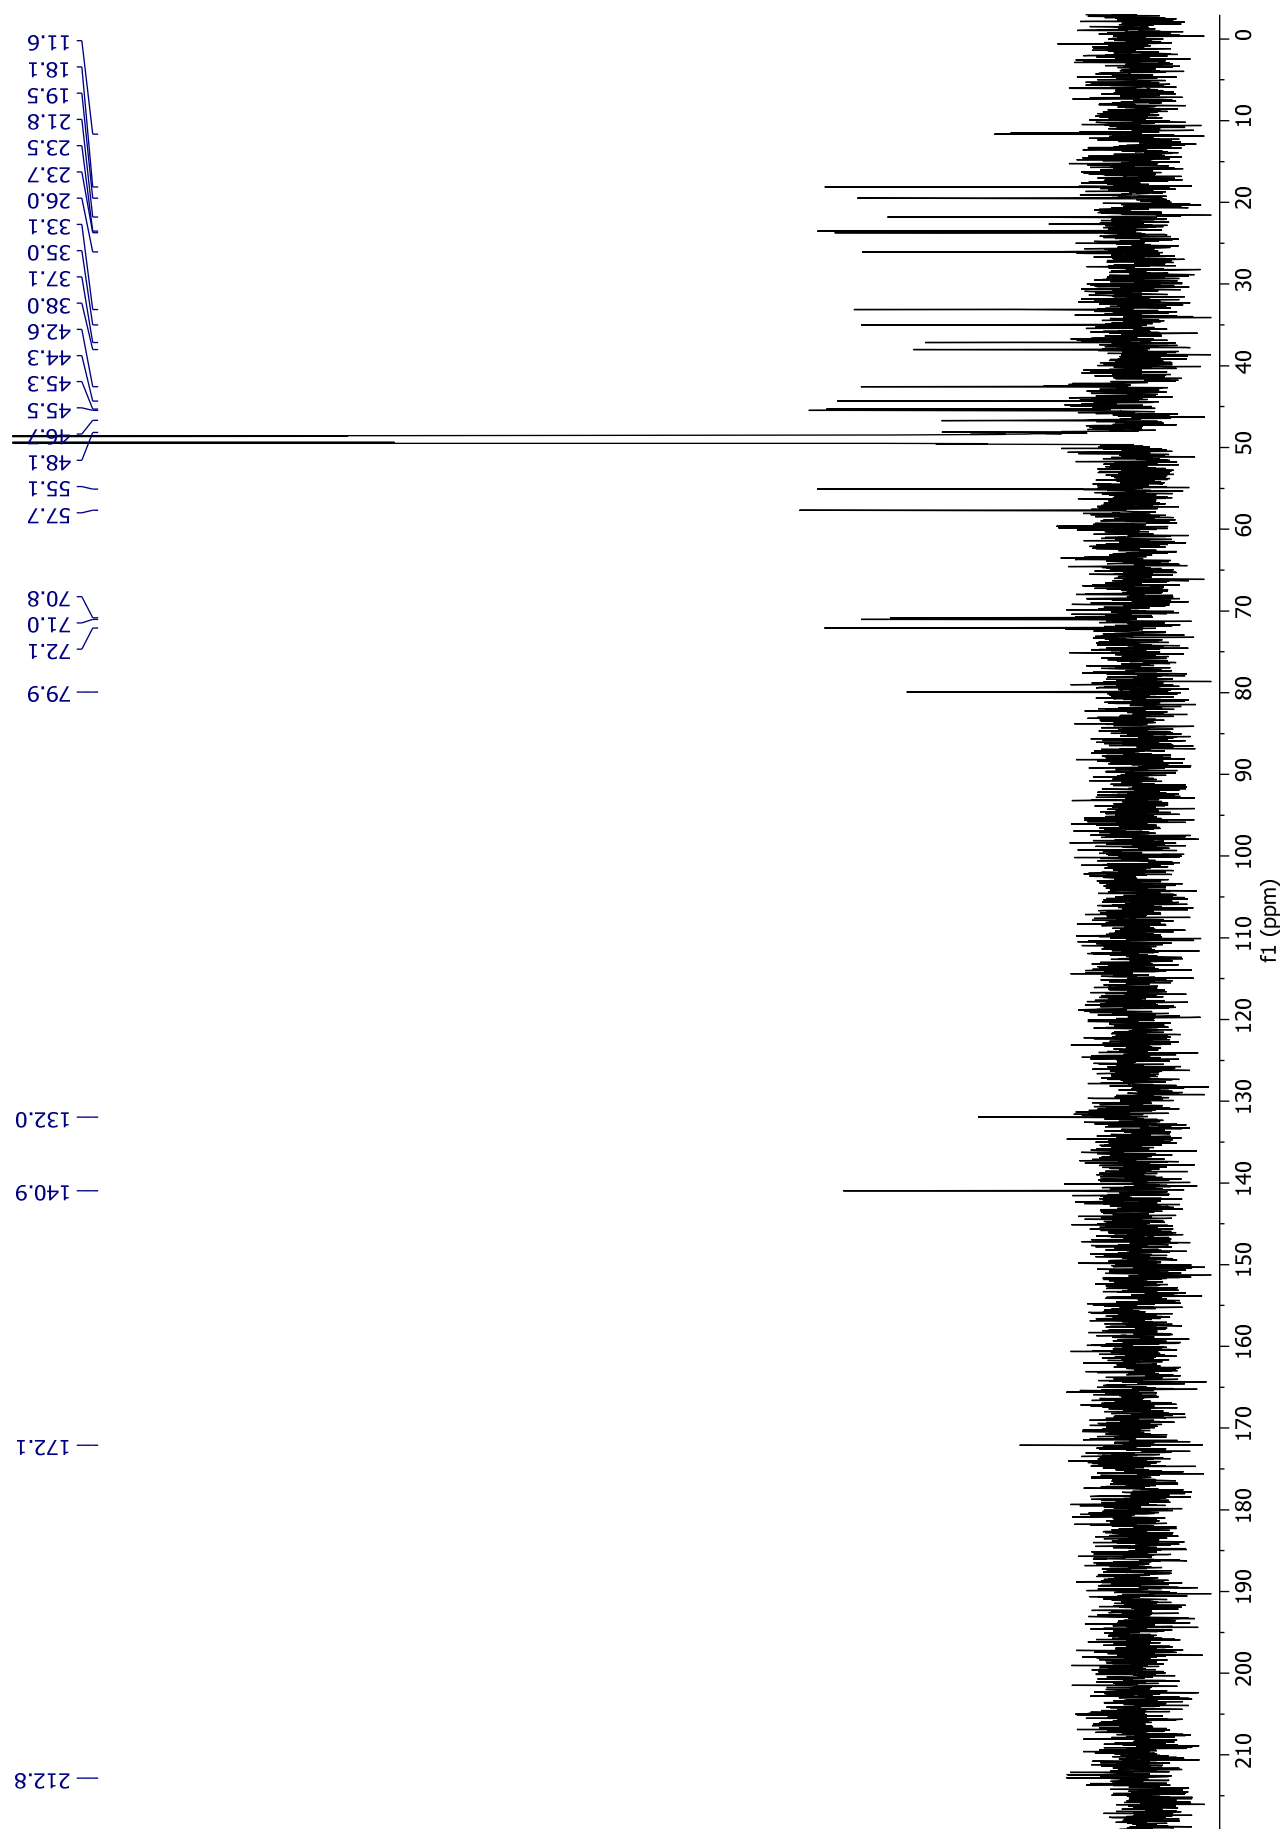

Figure S38 –  $^1\text{H}$  NMR spectrum (600 MHz,  $\text{CD}_3\text{OD}$ ) of **7**

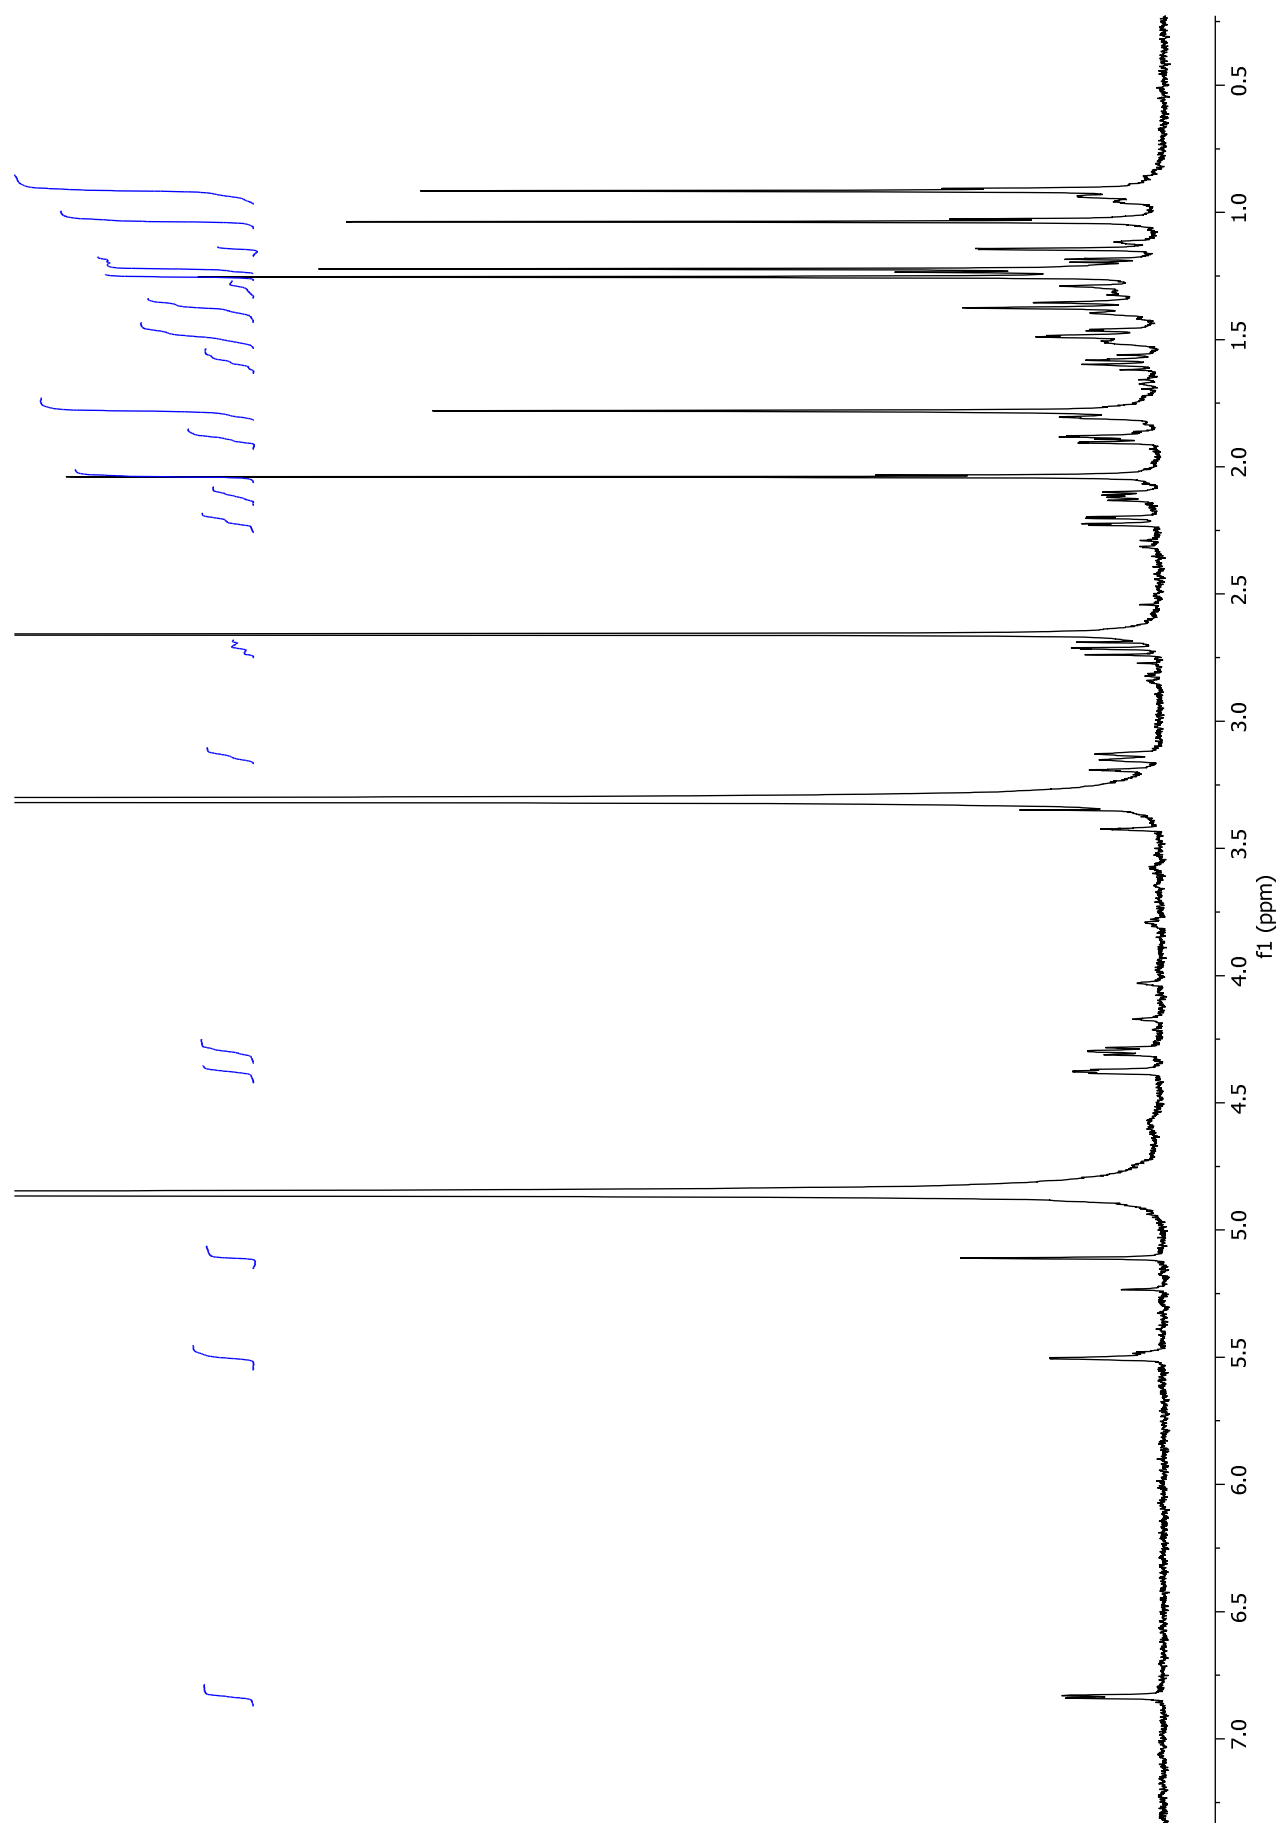

Figure S39 – COSY NMR spectrum (500 MHz, CD<sub>3</sub>OD) of **6**

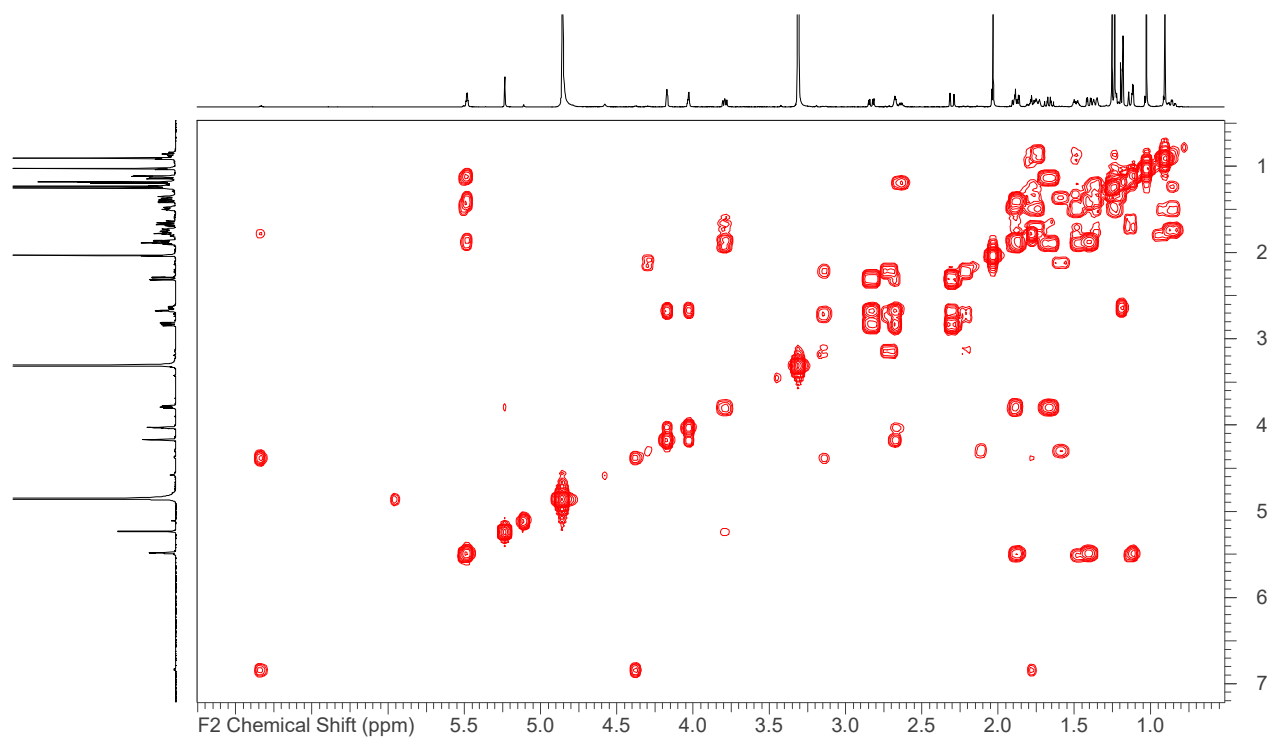

Figure S40 – HSQC NMR spectrum (500 MHz, CD<sub>3</sub>OD) of **6** (extra signals due to conversion to **7** during acquisition).

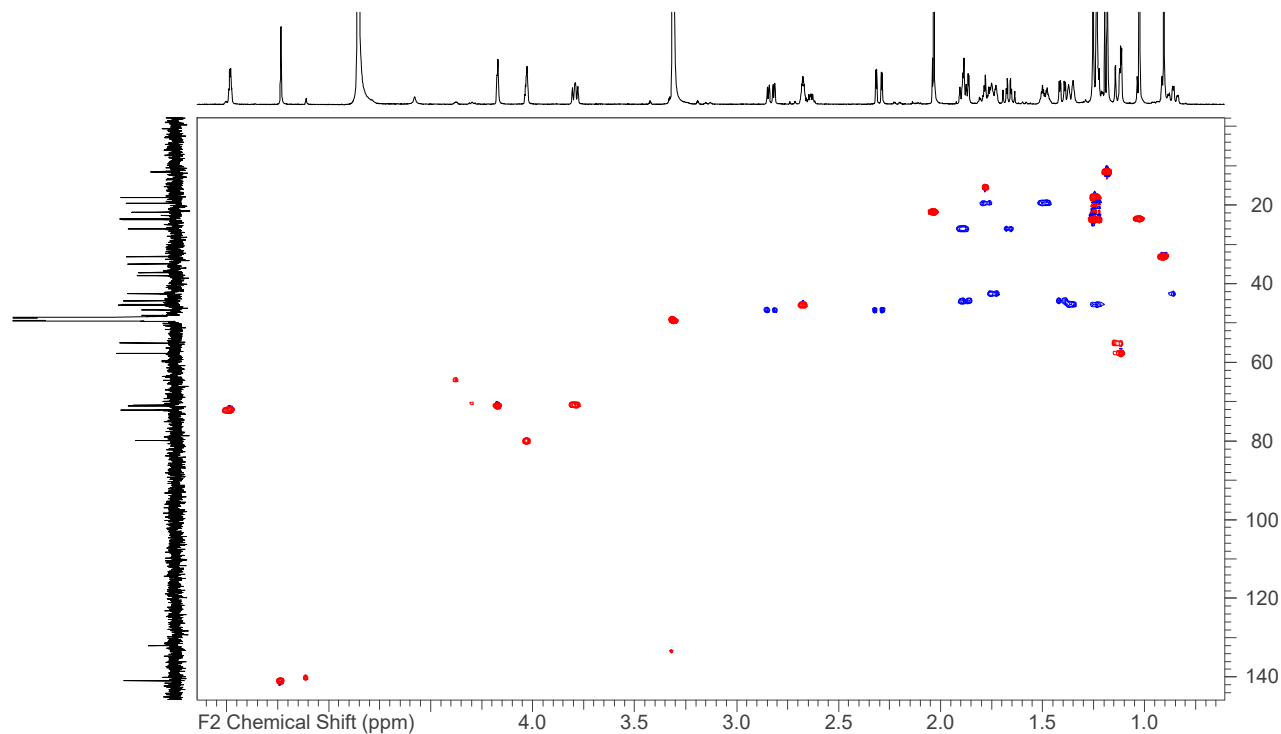

Figure S41 – HMBC NMR spectrum (500 MHz, CD<sub>3</sub>OD) of **6** (extra signals due to conversion to **7** during acquisition).

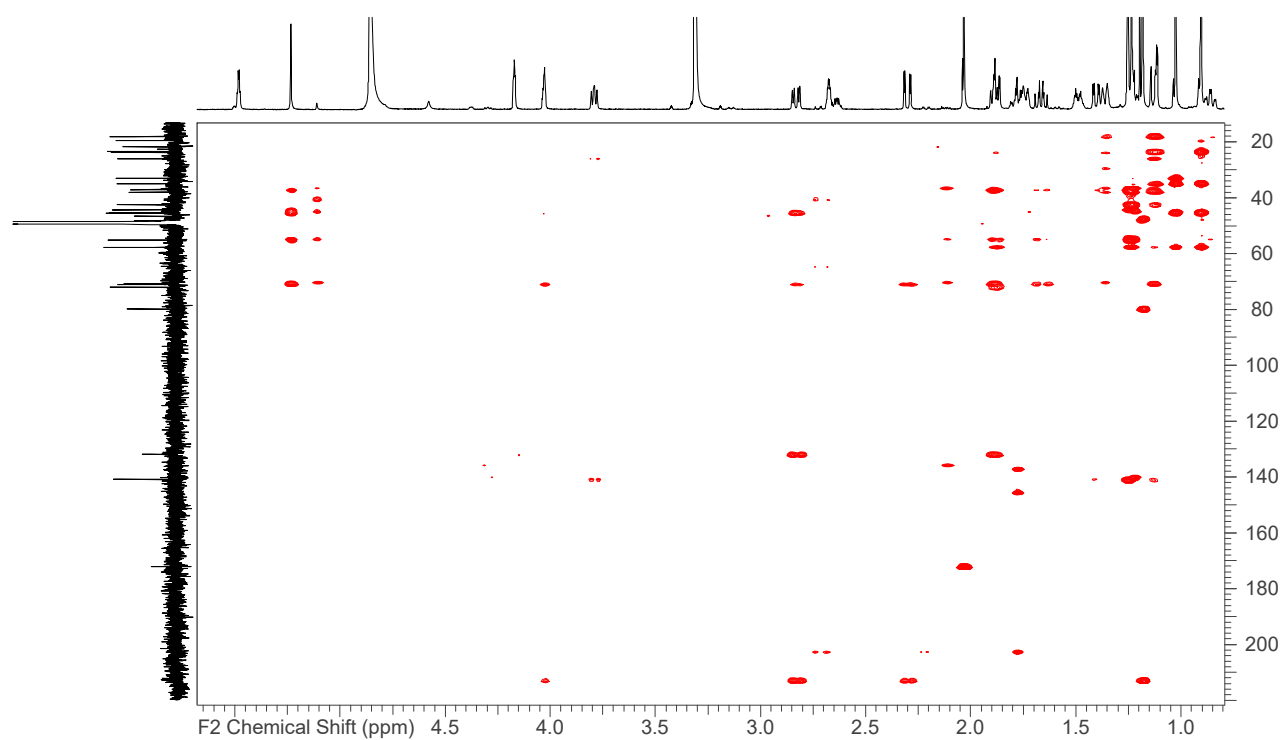

Figure S42 – NOESY NMR spectrum (600 MHz, CD<sub>3</sub>OD) of **6** (extra signals due to conversion to **7** during acquisition).

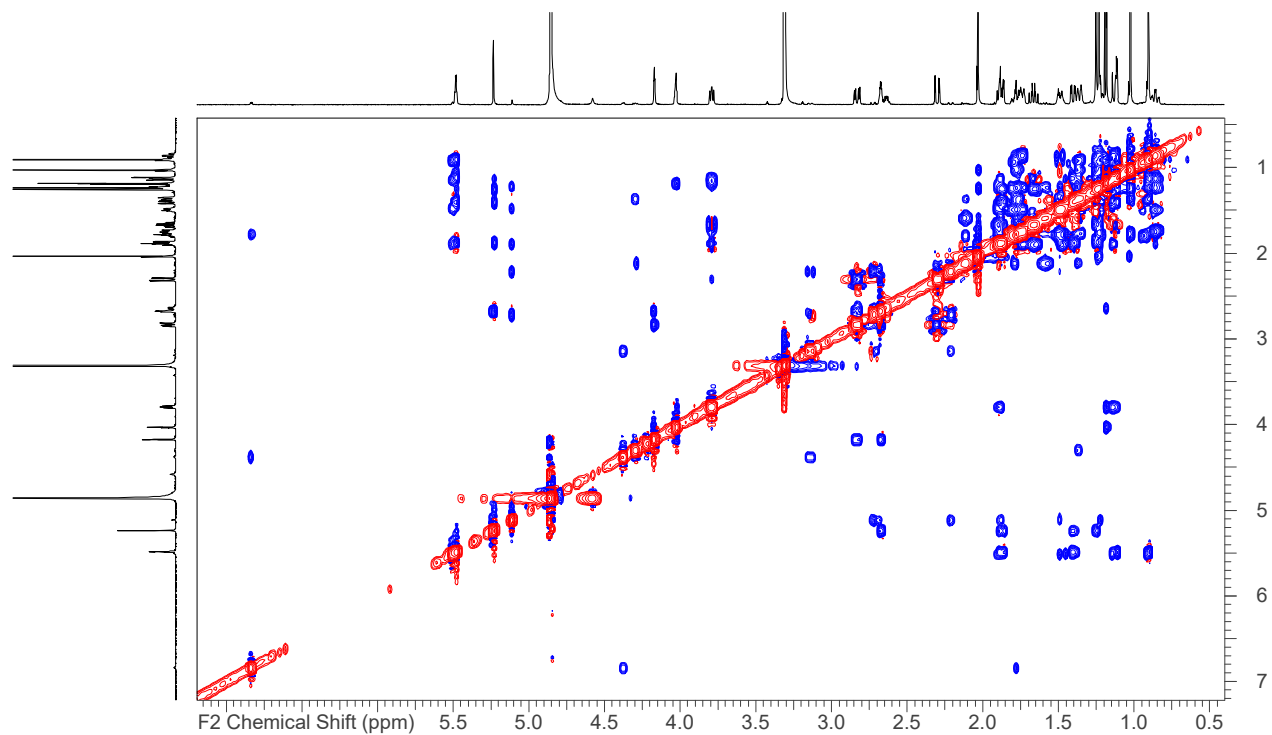

Figure S43 – HRESIMS analysis of **6**

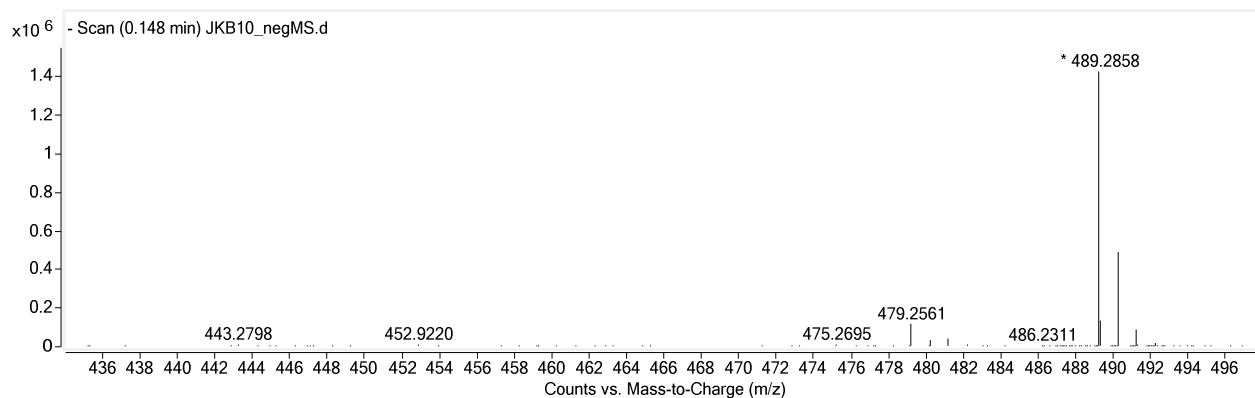

| Best | Name | Formula                                        | Score | Mass      | Mass (DB) | Mass (MFG) | Diff (ppm) |
|------|------|------------------------------------------------|-------|-----------|-----------|------------|------------|
| ☉    |      | C <sub>27</sub> H <sub>40</sub> O <sub>5</sub> | 99.85 | 444.28732 |           |            | 0.57       |

| Species   | Ion Formula | m/z      | Height   | Score (MFG) | Score (MS) | Score (mass) |
|-----------|-------------|----------|----------|-------------|------------|--------------|
| (M-H)-    |             | 443.2799 | 883.7    |             | 79.42      | 98.5         |
| (M+Cl)-   |             | 479.2562 | 6973.1   |             | 81.39      | 97.16        |
| (M+HCOO)- |             | 489.2855 | 197169.1 |             | 99.85      | 99.76        |

| m/z      | m/z (Calc) | Diff (ppm) | Diff (mDa) | Height   | Height (Calc) | Height % |
|----------|------------|------------|------------|----------|---------------|----------|
| 489.2855 | 489.2858   | 0.54       | 0.3        | 197169.1 | 196111.7      | 100      |
| 490.289  | 490.2892   | 0.35       | 0.2        | 60595.7  | 60838.3       | 30.7     |
| 491.2917 | 491.292    | 0.63       | 0.3        | 11455.3  | 11936.4       | 5.8      |
| 492.2972 | 492.2947   | -5.05      | -2.5       | 1392.3   | 1752.5        | 0.7      |
| 493.2995 | 493.2974   | -4.26      | -2.1       | 236      | 209.4         | 0.1      |

Figure S44 – Chromatogram of C18 HPLC separation of **6** and **7** at 210 nm and their UV/Vis spectra.

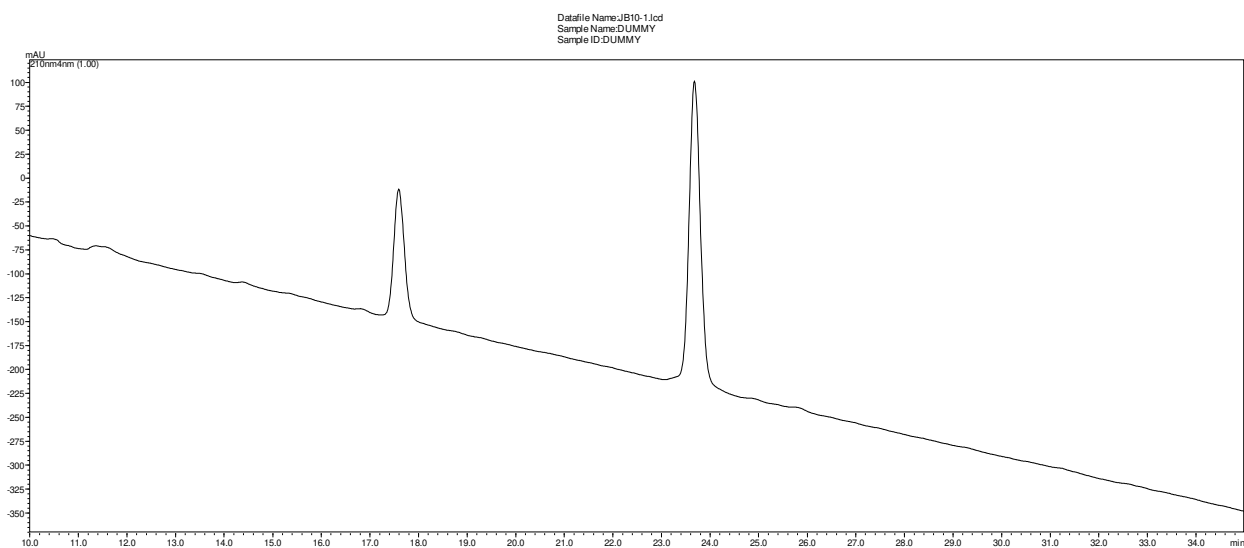

**6**

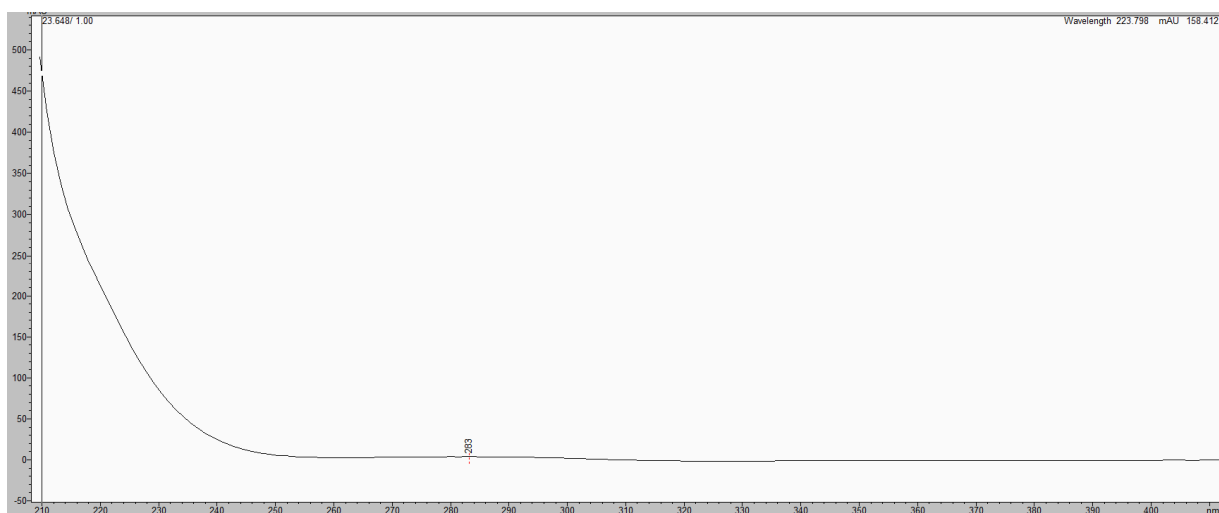

**7**

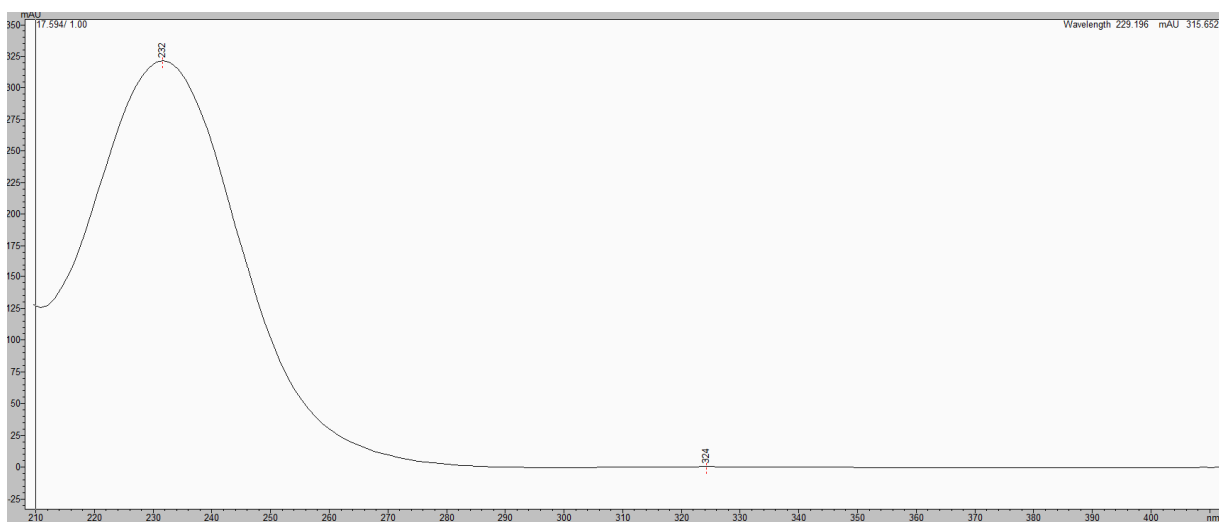



Table S8 – NMR data for secosuberitenone A (**8**) (600 ( $^1\text{H}$ ) and 150 ( $^{13}\text{C}$ ) MHz,  $\text{CDCl}_3$ ).

| pos        | $\delta_{\text{C}}$ , type | $\delta_{\text{H}}$ | gCOSY            | gHMBC                  | NOESY             |
|------------|----------------------------|---------------------|------------------|------------------------|-------------------|
| <b>1</b>   | 63.6, CH                   | 4.31, br t          | 2, 6, 21         | 2, 3, 5                | 2, 6, 22'         |
| <b>2</b>   | 141.7, CH                  | 6.78, br d (4.4)    | 1, 21            | 1, 4, 6, 21            | 1, 8'             |
| <b>3</b>   | 137.6, C                   |                     |                  |                        |                   |
| <b>4</b>   | 200.0 C                    |                     |                  |                        |                   |
| <b>5</b>   | 37.3, $\text{CH}_2$        | 2.84, m             | 5', 6            | 1, 4, 6                | 8, 22'            |
| <b>5'</b>  |                            | 2.36, o/l           | 5, 6             | 1, 3, 4, 6             | 8'                |
| <b>6</b>   | 45.5, CH                   | 2.75, m             | 1, 5, 5', 22     | 1, 4                   | 1, 8'             |
| <b>7</b>   | 148.8, C                   |                     |                  |                        |                   |
| <b>8</b>   | 34.2, $\text{CH}_2$        | 2.35, o/l           | 8', 9            | 7, 9, 10, 22           |                   |
| <b>8'</b>  |                            | 1.86 o/l            | 8, 9, 9'         | 6, 7, 9, 22            | 2, 6, 12          |
| <b>9</b>   | 22.5, $\text{CH}_2$        | 1.76, o/l           | 8, 8', 9'        | 7, 8, 10, 11           | 17', 22           |
| <b>9'</b>  |                            | 1.52, o/l           | 8, 8', 9, 10     | 7, 8, 10, 11           | 22                |
| <b>10</b>  | 57.5, CH                   | 1.68, m             | 9', 23, 23'      | 8, 11, 12, 15, 16, 24  | 14                |
| <b>11</b>  | 144.4, C                   |                     |                  |                        |                   |
| <b>12</b>  | 47.8, $\text{CH}_2$        | 2.34, o/l           | 13, 23, 23'      | 11, 13, 23             | 8', 13, 22        |
| <b>13</b>  | 69.5, CH                   | 4.38, br t          | 12, 14           |                        | 12, 14, 16', 20   |
| <b>14</b>  | 57.6, CH                   | 1.08, o/l           | 13               | 13, 15, 19, 20, 24, 25 | 10, 13, 20        |
| <b>15</b>  | 41.2, C                    |                     |                  |                        |                   |
| <b>16</b>  | 42.2, $\text{CH}_2$        | 1.78, o/l           | 16', 17, 17', 18 |                        | 16', 25           |
| <b>16'</b> |                            | 1.07, o/l           | 16, 17, 17'      |                        | 13, 16            |
| <b>17</b>  | 19.7, $\text{CH}_2$        | 1.64, m             | 16, 16', 18      |                        |                   |
| <b>17'</b> |                            | 1.50, m             | 16, 16', 17, 18' |                        |                   |
| <b>18</b>  | 44.0, $\text{CH}_2$        | 1.39, m             | 16, 17, 17', 18' |                        | 18', 20           |
| <b>18'</b> |                            | 1.19, m             | 17', 18          | 17, 25                 | 18                |
| <b>19</b>  | 34.6, C                    |                     |                  |                        |                   |
| <b>20</b>  | 33.8, $\text{CH}_3$        | 1.01, s             | 25               | 14, 15, 17, 19, 25     | 13, 14, 16, 18    |
| <b>21</b>  | 15.8, $\text{CH}_3$        | 1.84, s             | 1, 2             | 1, 2, 3, 4             |                   |
| <b>22</b>  | 112.4, $\text{CH}_2$       | 5.16, s             | 22'              | 1, 6, 7, 8             | 9, 9', 22'        |
| <b>22'</b> |                            | 4.92, s             | 6, 22            | 1, 6, 7, 8             | 1, 5, 22, 23, 23' |
| <b>23</b>  | 110.4, $\text{CH}_2$       | 5.03, s             | 10, 12, 23'      | 10, 11, 12             | 22', 23'          |
| <b>23'</b> |                            | 4.77, s             | 10, 12, 23       | 10, 11, 12             | 22', 23           |
| <b>24</b>  | 17.3, $\text{CH}_3$        | 1.00, s             |                  | 10, 14, 15, 16         | 25                |
| <b>25</b>  | 23.8, $\text{CH}_3$        | 1.22, s             | 20               | 14, 18, 19, 20         | 24                |

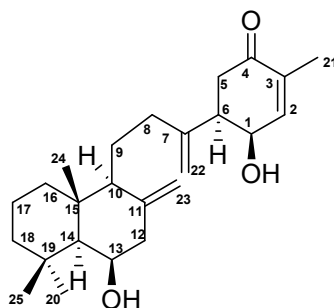

Figure S45 –  $^1\text{H}$  NMR spectrum (600 MHz,  $\text{CDCl}_3$ ) of **8**

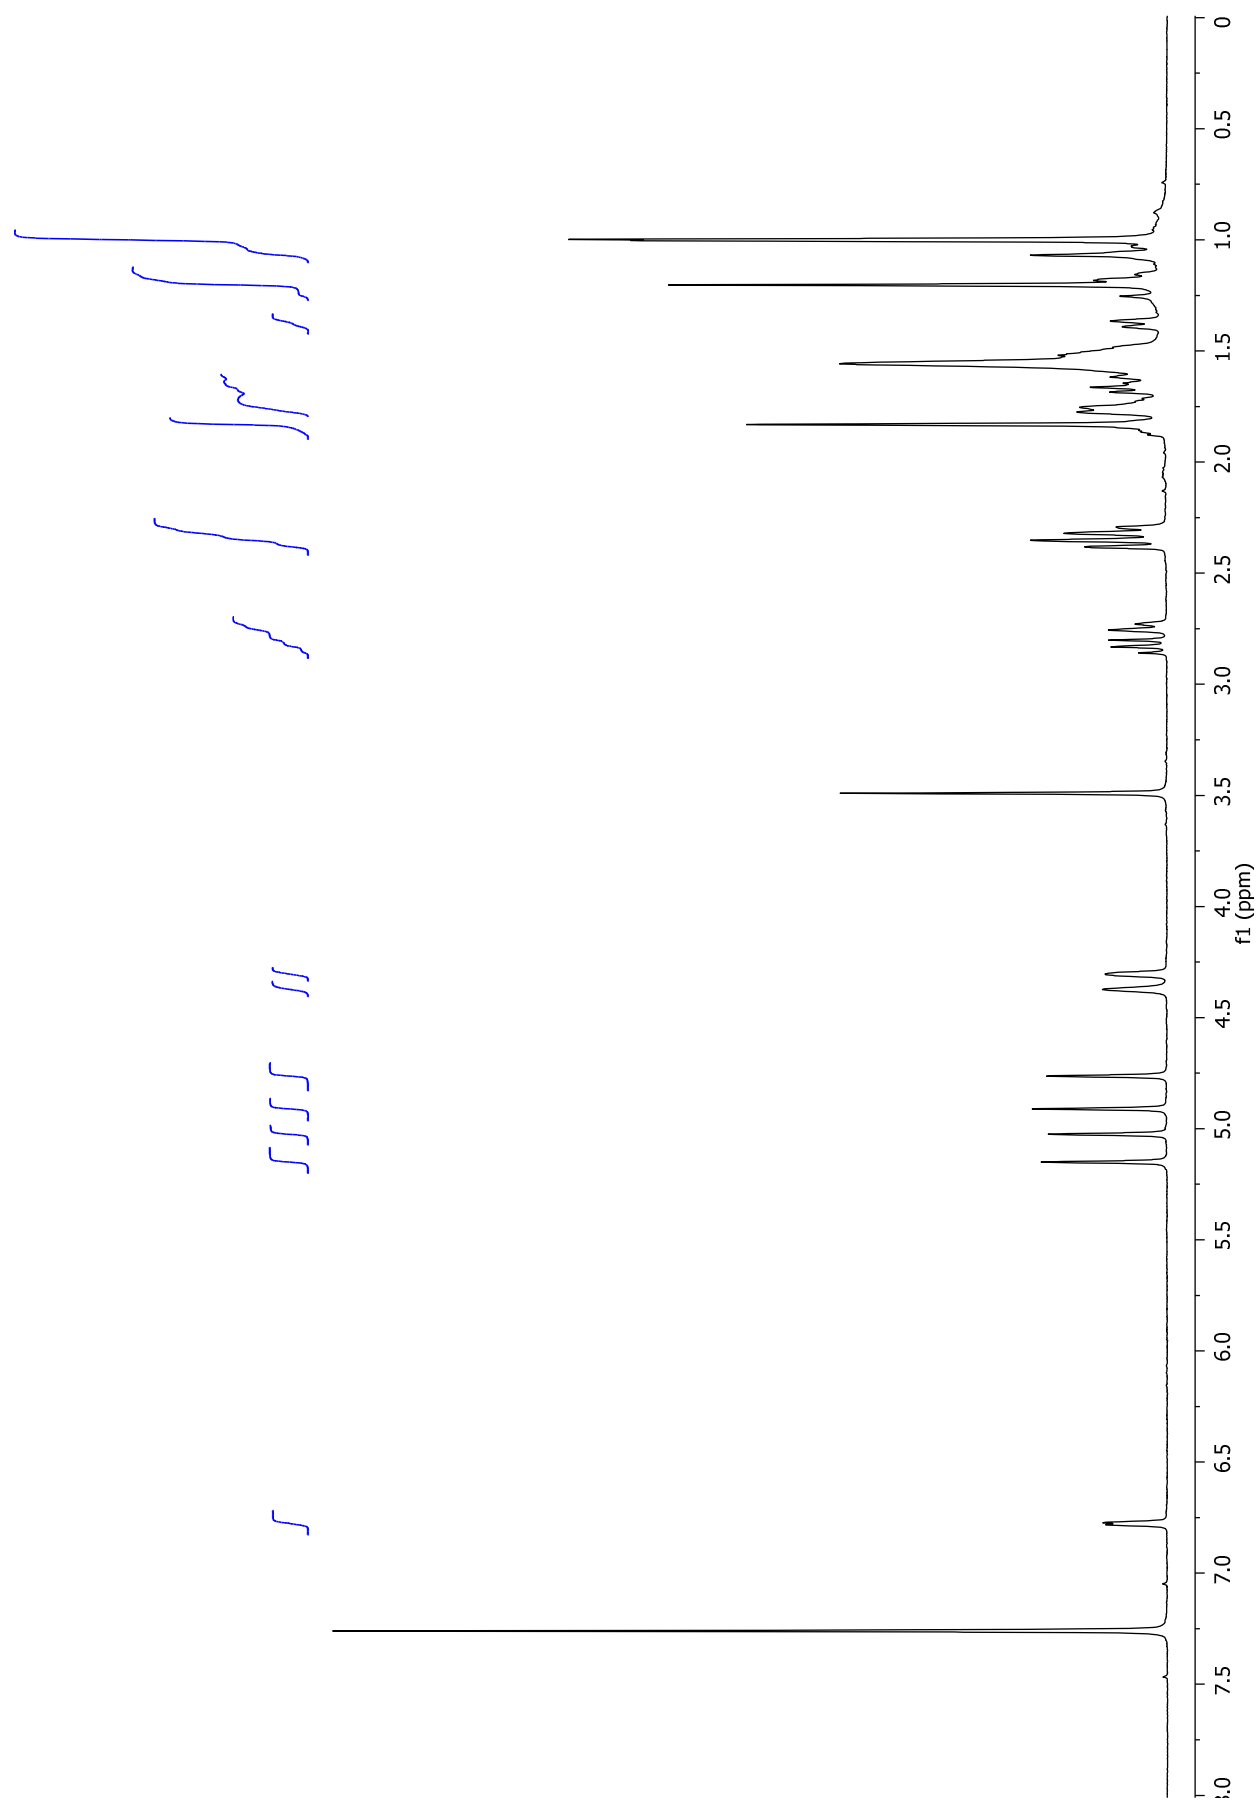

Figure S46 –  $^{13}\text{C}$  NMR spectrum (125 MHz,  $\text{CDCl}_3$ ) of **8**

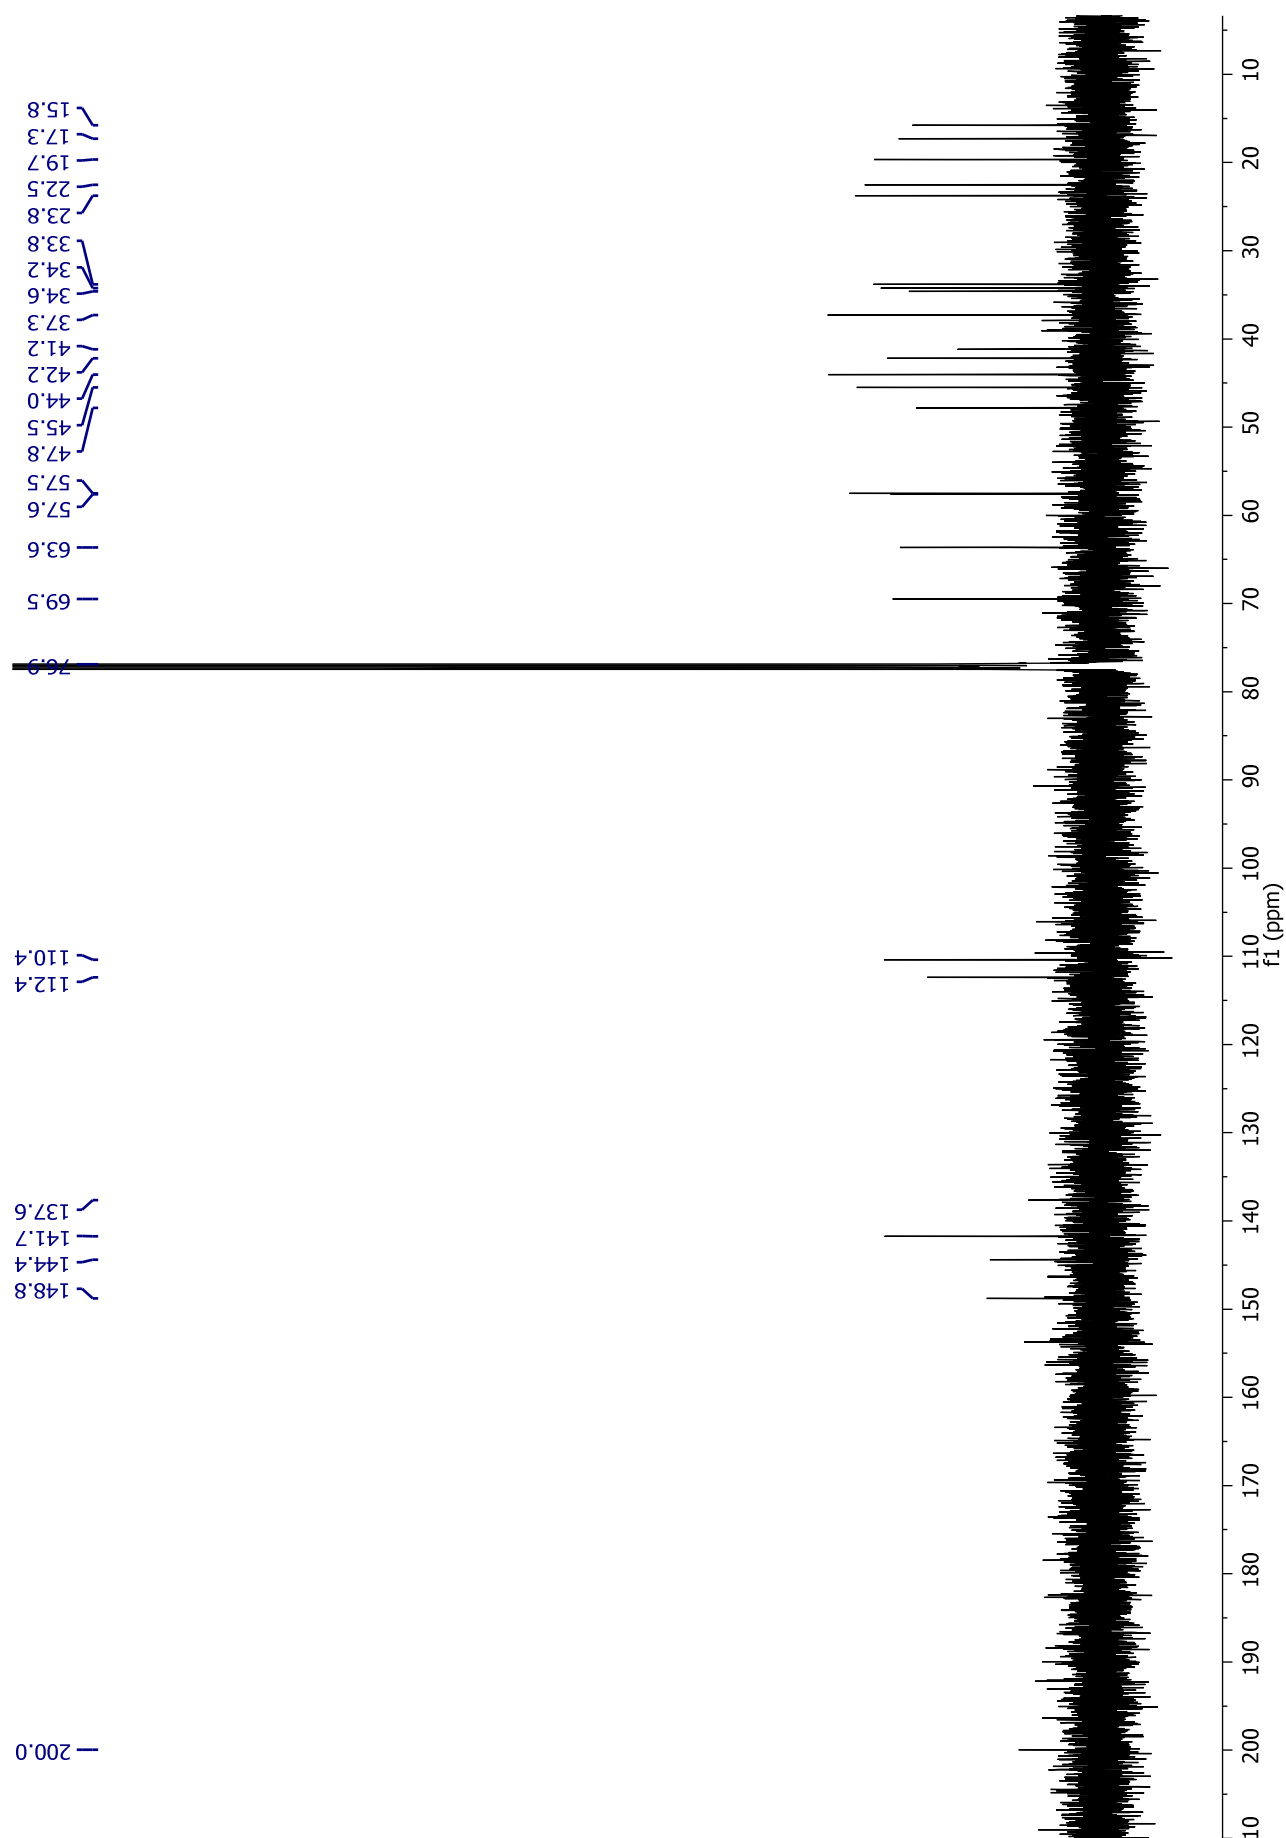

Figure S47 – COSY NMR spectrum (600 MHz, CDCl<sub>3</sub>) of **8**

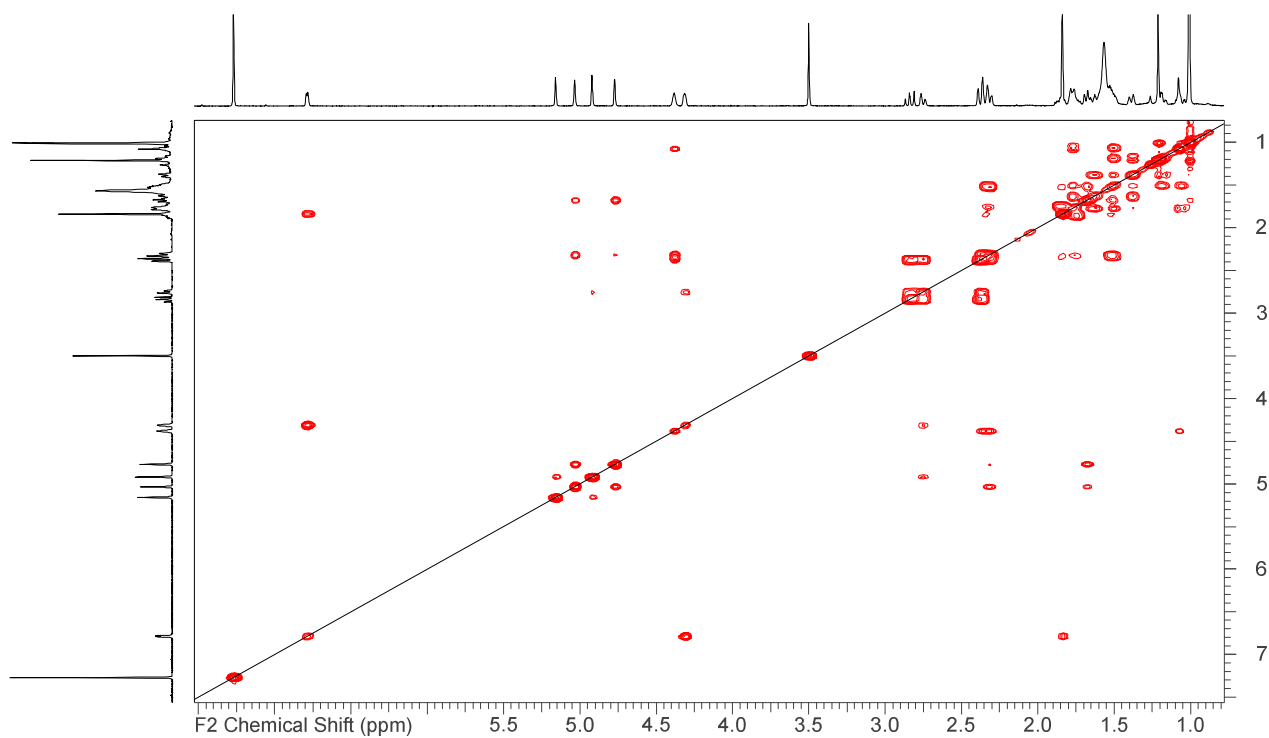

Figure S48 – HSQC NMR spectrum (600 MHz, CDCl<sub>3</sub>) of **8**

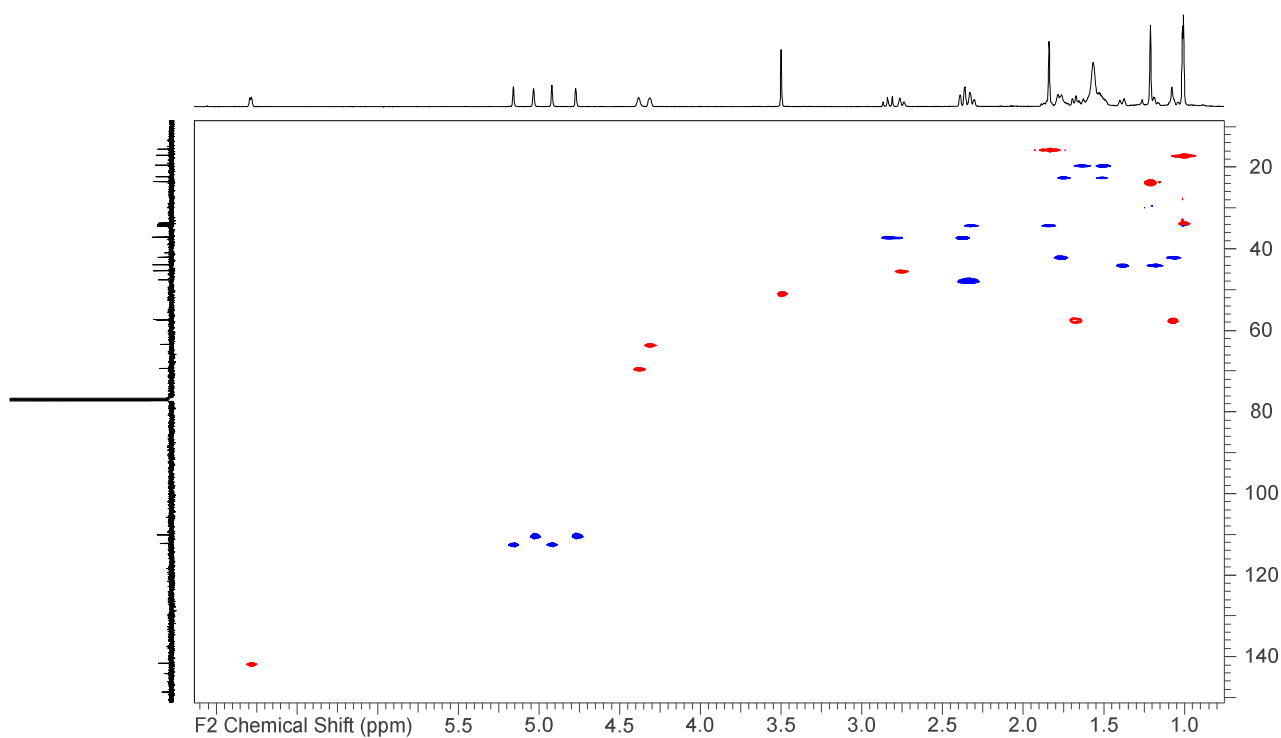

Figure S49 – HMBC NMR spectrum (600 MHz, CDCl<sub>3</sub>) of **8**

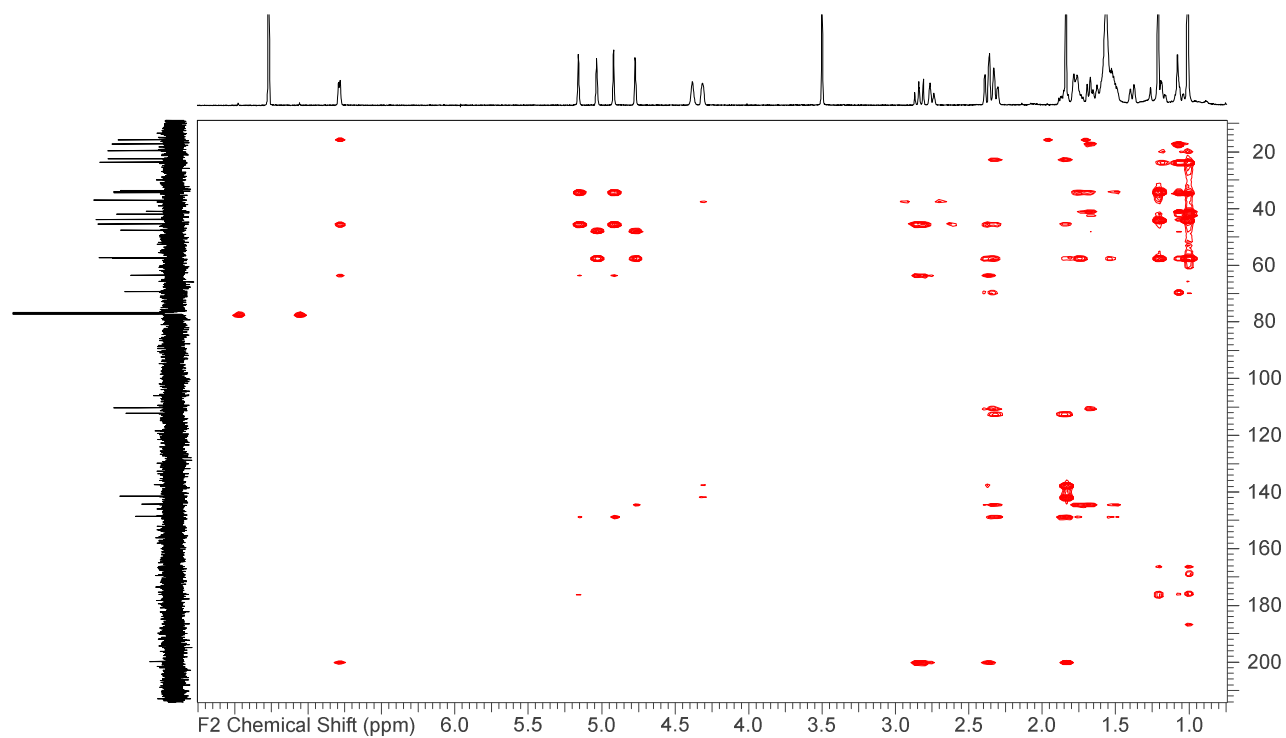

Figure S50 – NOESY NMR spectrum (600 MHz, CDCl<sub>3</sub>) of **8**

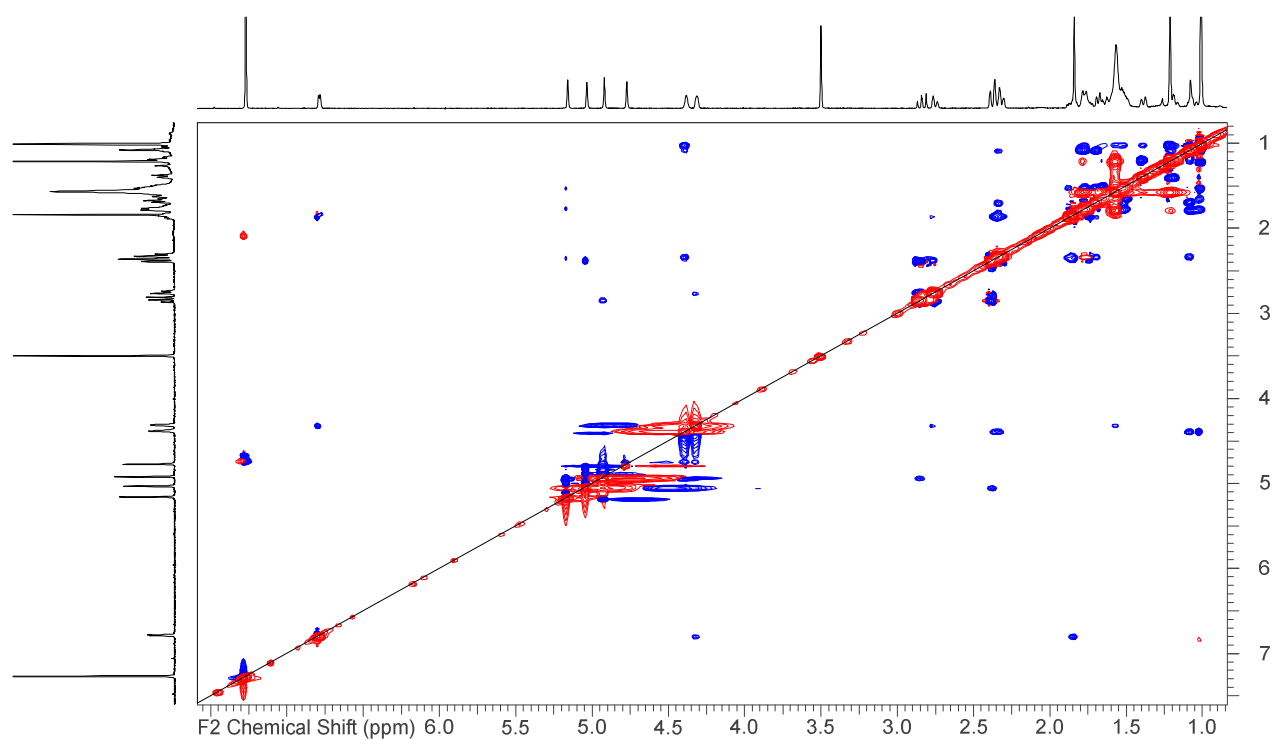

Figure S51 – HRESIMS analysis of **6**

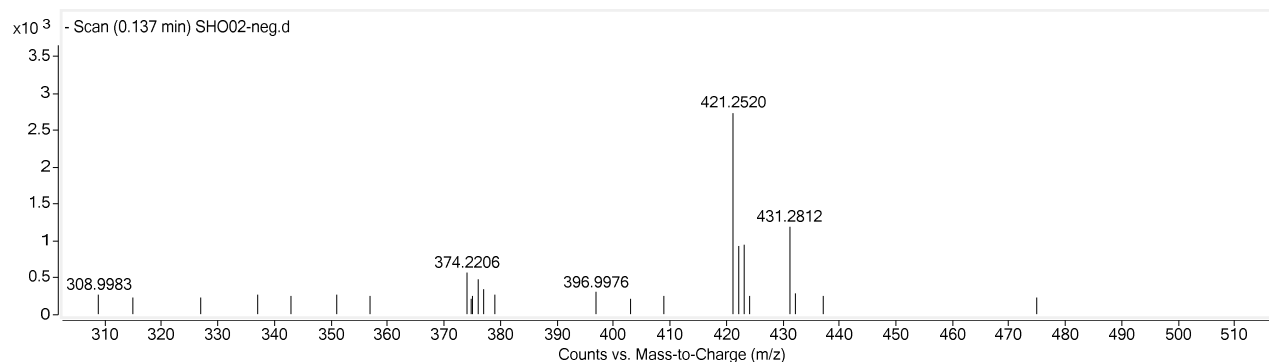

| Best | Name | Formula                                        | Score | Mass      | Mass (DB) | Mass (MFG) | Diff (ppm) |
|------|------|------------------------------------------------|-------|-----------|-----------|------------|------------|
|      |      | C <sub>25</sub> H <sub>38</sub> O <sub>3</sub> | 78.24 | 386.28256 |           |            | -1.19      |

  

| Species   | Ion Formula | m/z      | Height | Score (MFG) | Score (MS) | Score (mass) | S |
|-----------|-------------|----------|--------|-------------|------------|--------------|---|
| (M+Cl)-   |             | 421.2531 | 1468.7 |             | 71.42      | 99.83        |   |
| (M+HCOO)- |             | 431.2814 | 1085.7 |             | 78.24      | 95.21        |   |

  

| m/z      | m/z (Calc) | Diff (ppm) | Diff (mDa) | Height | Height (Calc) | Height % | He |
|----------|------------|------------|------------|--------|---------------|----------|----|
| 431.2814 | 431.2803   | -2.51      | -1.1       | 1085.7 | 1052.6        | 100      |    |
| 432.2843 | 432.2837   | -1.29      | -0.6       | 269.7  | 302.7         | 24.8     |    |

Table S9 – NMR data for norsuberitenone A (**8**) (500 ( $^1\text{H}$ ) and 125 ( $^{13}\text{C}$ ) MHz,  $\text{CD}_3\text{OD}$ ).

| pos        | $\delta_{\text{C}}$ , type | $\delta_{\text{H}}$  | gCOSY                 | gHMBC                 | NOESY     |
|------------|----------------------------|----------------------|-----------------------|-----------------------|-----------|
| <b>1</b>   | 61.0, $\text{CH}_2$        | 2.21, d (13.1)       | 1', 16                | 2, 5, 6, 7, 16        | 5, 7'     |
| <b>1'</b>  |                            | 1.90, dd (13.1, 2.4) | 1, 3'                 | 2, 3, 5, 6, 7, 16     | 16        |
| <b>2</b>   | 215.1, C                   |                      |                       |                       |           |
| <b>3</b>   | 42.4, $\text{CH}_2$        | 2.37, m              | 3', 4                 | 2, 4                  | 5         |
| <b>3'</b>  |                            | 2.33, m              | 1', 3, 4'             | 2, 5                  |           |
| <b>4</b>   | 23.3, $\text{CH}_2$        | 2.05, m              | 3, 4', 5              | 2, 3, 6               |           |
| <b>4'</b>  |                            | 1.78, o/l            | 3', 4, 5              | 3, 5, 6               |           |
| <b>5</b>   | 58.1, CH                   | 1.56, dd (12.7, 3.0) | 4, 4'                 | 1, 4, 6, 10, 16, 17   | 1, 3, 9   |
| <b>6</b>   | 39.5, C                    |                      |                       |                       |           |
| <b>7</b>   | 51.2, $\text{CH}_2$        | 1.76, o/l            | 7', 8                 | 6, 8, 9, 16           |           |
| <b>7'</b>  |                            | 1.52, dd (14.1, 3.3) | 7, 8, 16              | 1, 6, 16              | 1         |
| <b>8</b>   | 68.6, CH                   | 4.44, q (2.5)        | 7, 7', 9              |                       | 15        |
| <b>9</b>   | 58.7, CH                   | 1.02, br d (2.1)     | 8                     | 8, 10, 13, 14, 15, 17 | 5         |
| <b>10</b>  | 38.6, C                    |                      |                       |                       |           |
| <b>11</b>  | 43.6, $\text{CH}_2$        | 1.75, o/l            | 11', 12, 12'          | 9                     |           |
| <b>11'</b> |                            | 1.03, o/l            | 11, 12, 12'           |                       |           |
| <b>12</b>  | 19.8, $\text{CH}_2$        | 1.78, o/l            | 11, 11', 12', 13, 13' |                       | 17, 18    |
| <b>12'</b> |                            | 1.45, m              | 11, 11', 12, 13, 13'  |                       |           |
| <b>13</b>  | 45.4, $\text{CH}_2$        | 1.35, m              | 12, 12', 13'          |                       | 15        |
| <b>13'</b> |                            | 1.24, m              | 12, 12', 13           |                       |           |
| <b>14</b>  | 35.2, C                    |                      |                       |                       |           |
| <b>15</b>  | 33.8, $\text{CH}_3$        | 0.98, s              |                       | 9, 13, 14, 18         | 8, 13, 18 |
| <b>16</b>  | 22.2, $\text{CH}_3$        | 1.16, s              | 1, 7'                 | 1, 5, 6, 7            | 1'        |
| <b>17</b>  | 17.7, $\text{CH}_3$        | 1.25, s              |                       | 5, 9, 10, 11          | 12        |
| <b>18</b>  | 24.1, $\text{CH}_3$        | 1.23, s              |                       | 9, 13, 14, 15         | 12, 15    |

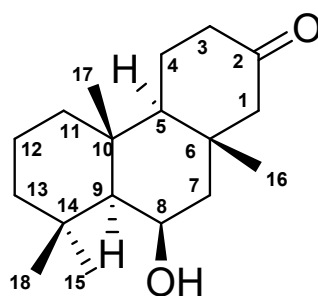

The image displays a  $^1\text{H}$  NMR spectrum of 1,2-dichloroethane ( $\text{ClCH}_2\text{CH}_2\text{Cl}$ ) in  $\text{CDCl}_3$ . The x-axis represents the chemical shift in ppm, ranging from 0.0 to 4.8. The spectrum features three main regions of peaks: a triplet at approximately 4.3 ppm, a large singlet at approximately 3.4 ppm, and a complex multiplet between 1.0 and 2.5 ppm. A blue integration curve is overlaid on the spectrum, showing the cumulative area under the peaks. The integration values are 1.00 for the triplet, 1.00 for the singlet, and 1.00 for the multiplet region.



Figure S53 –  $^{13}\text{C}$  NMR spectrum (150 MHz,  $\text{CD}_3\text{OD}$ ) of **9** (formic acid impurity  $\delta_{\text{C}}$  170.3)

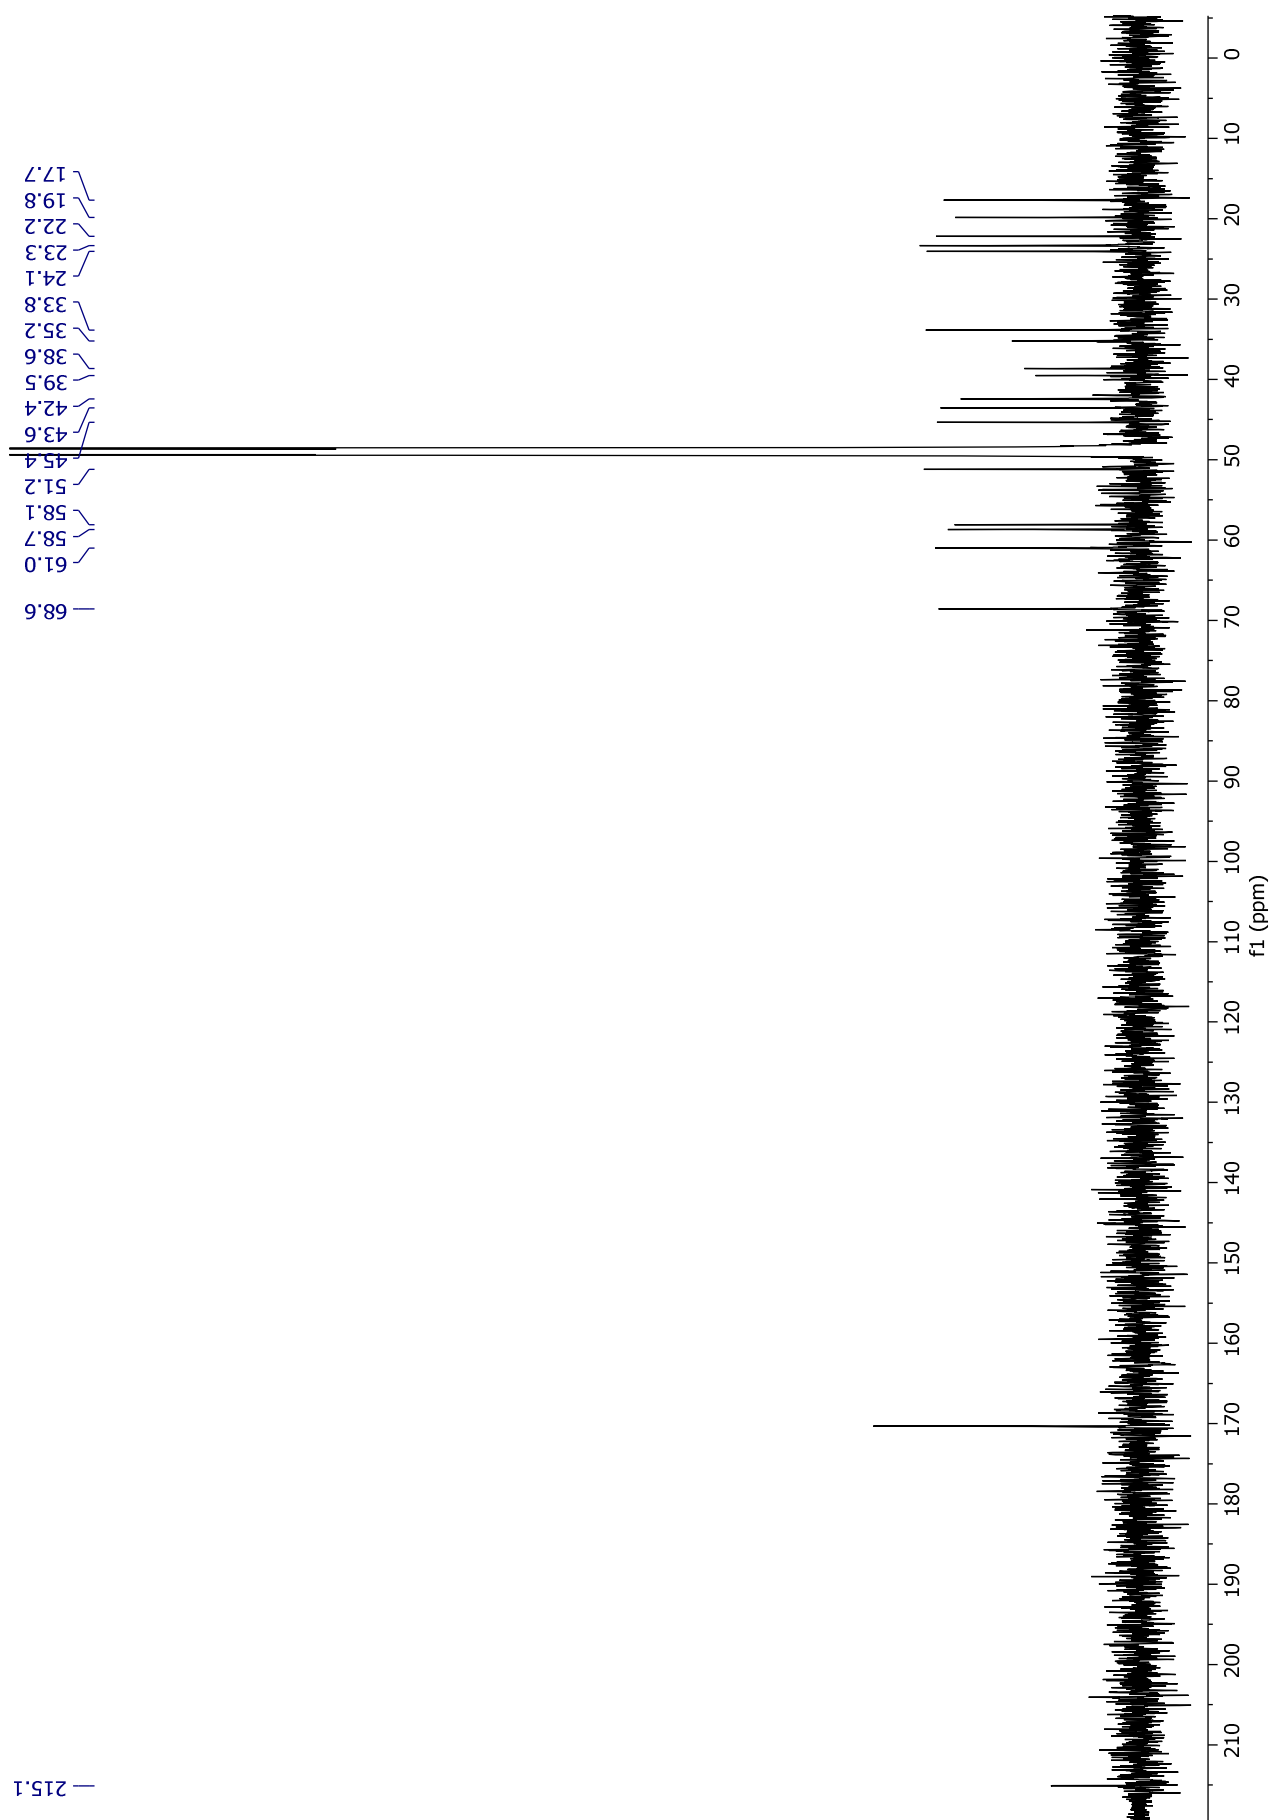

Figure S54 – COSY NMR spectrum (500 MHz, CD<sub>3</sub>OD) of **9**

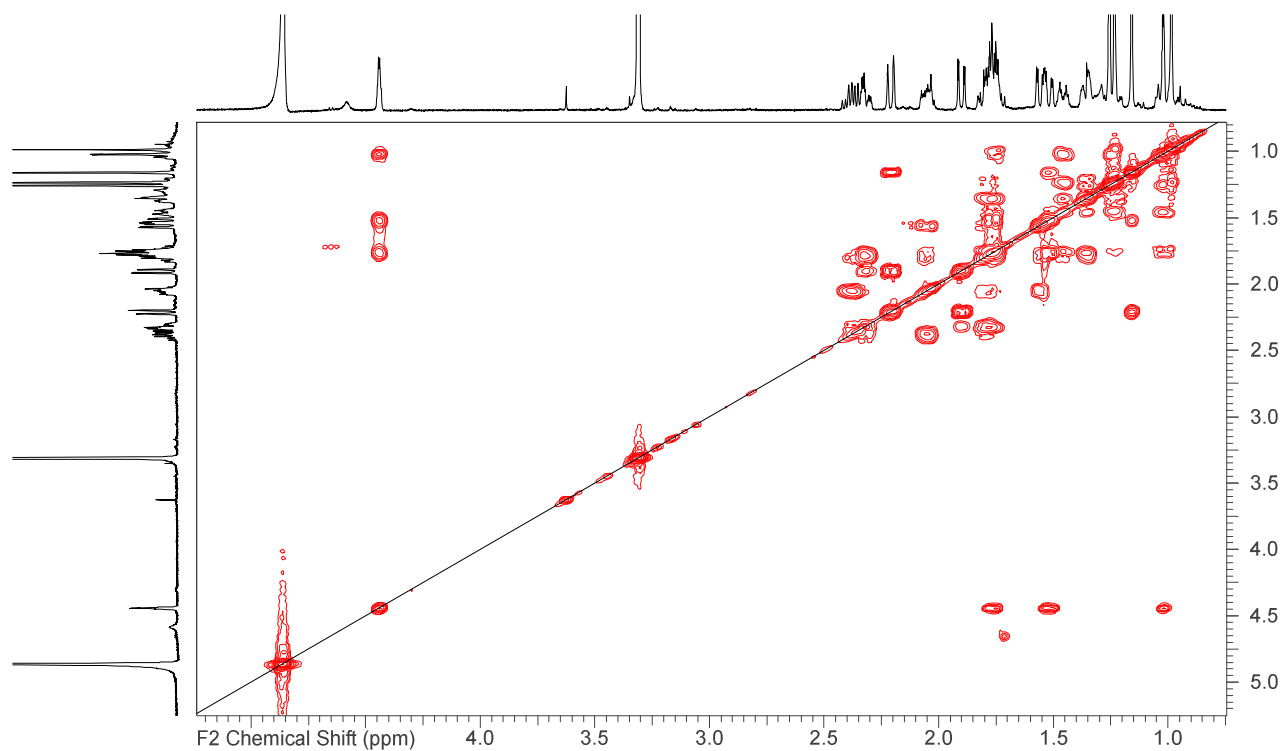

Figure S55 – HSQC NMR spectrum (500 MHz, CD<sub>3</sub>OD) of **9**

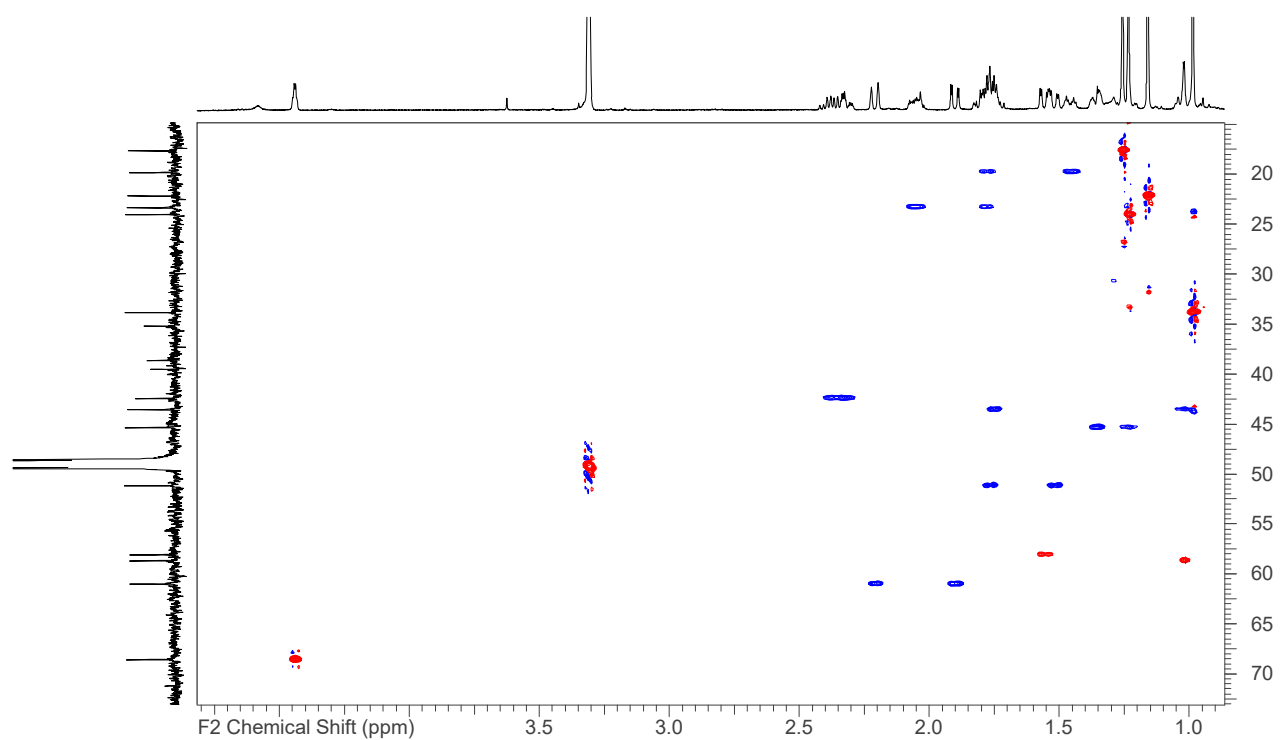

Figure S56 – HMBC NMR spectrum (500 MHz, CD<sub>3</sub>OD) of **9**

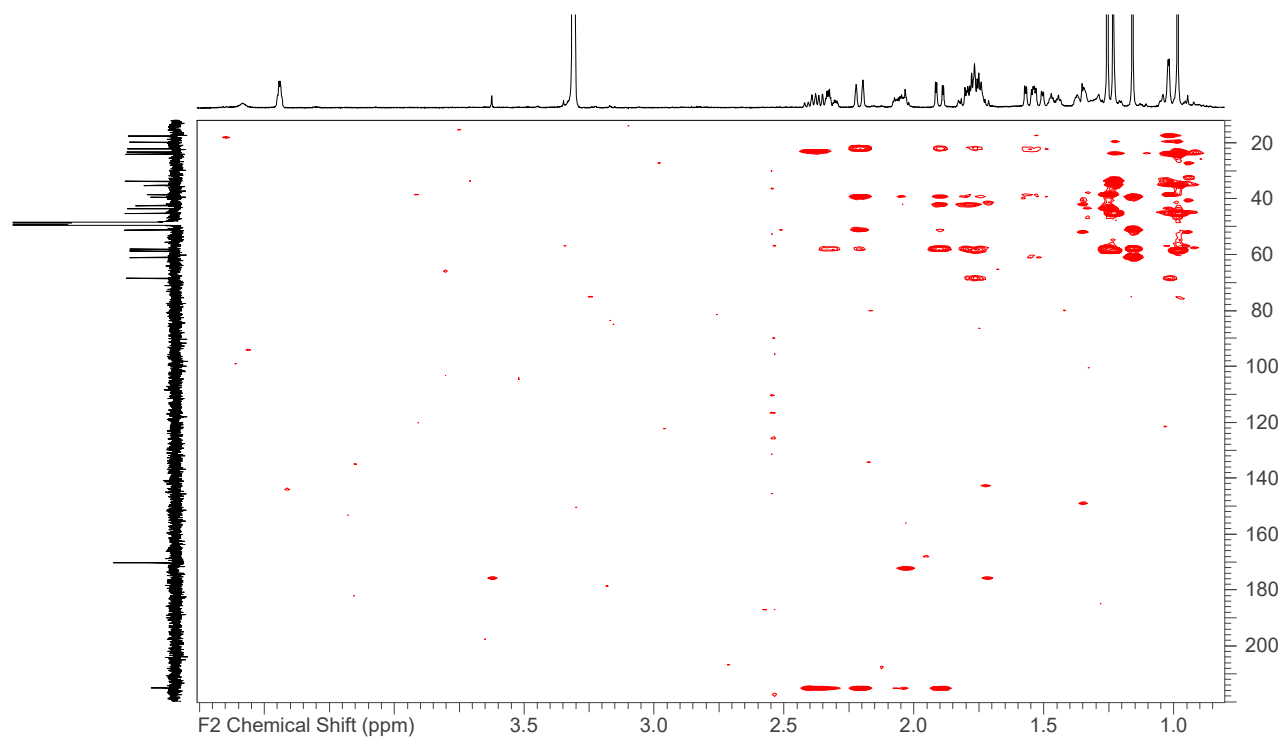

Figure S57 – NOESY NMR spectrum (600 MHz, CD<sub>3</sub>OD) of **9**

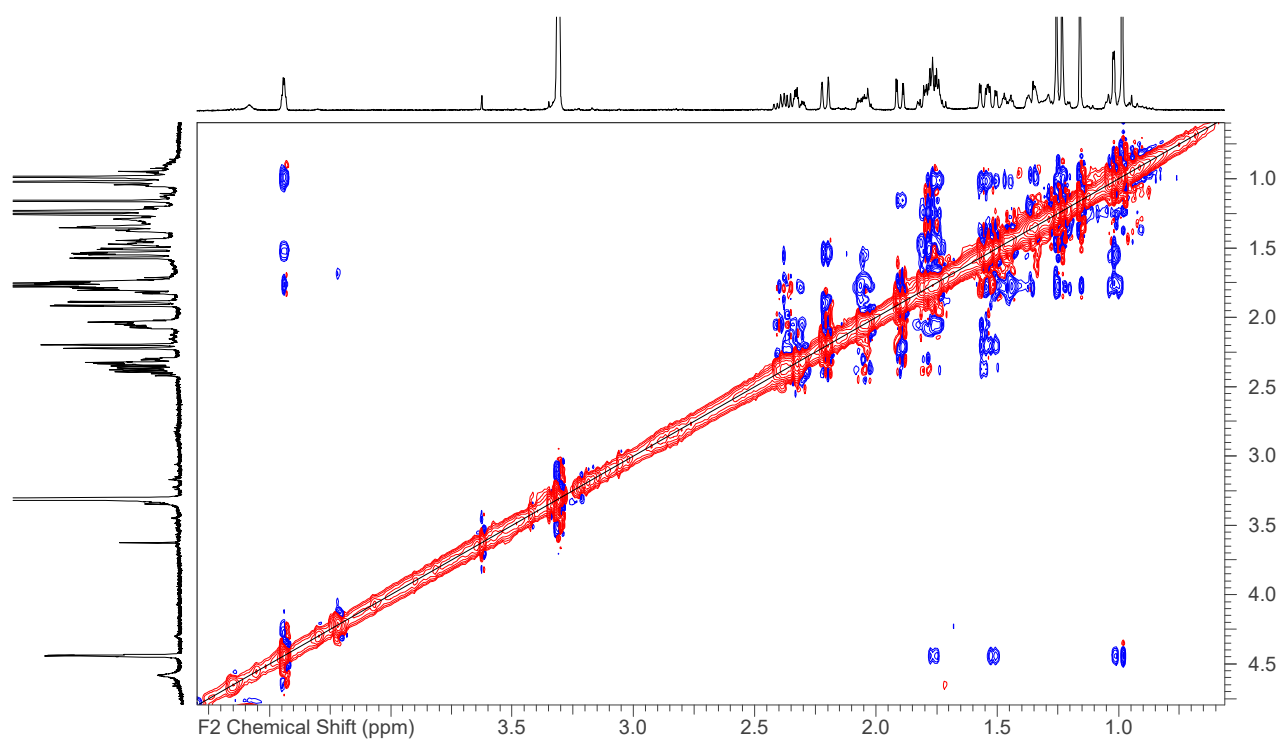

Figure S58 – HRESIMS analysis of **9**

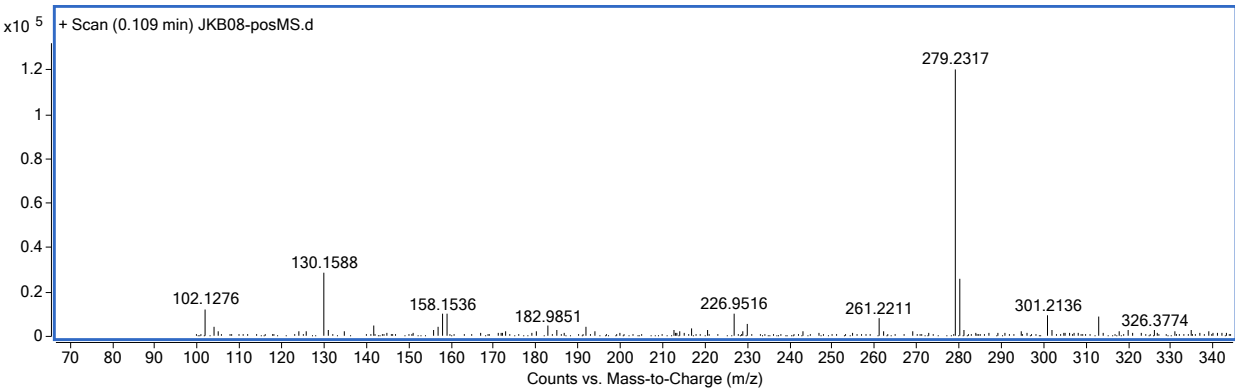

|           |            |            |            |             |               |              |                    |                      |       |    |
|-----------|------------|------------|------------|-------------|---------------|--------------|--------------------|----------------------|-------|----|
|           |            | C18 H30 O2 | 99.55      | 278.22476   |               |              | -0.64              | 0.64                 | -0.18 | 0  |
| Species   | Io         | m/z        | Height     | Score (MFG) | Score (MS)    | Score (mass) | Score (iso. abund) | Score (iso. spacing) |       |    |
| (M+H)+    |            | 279.232    | 78426.3    |             | 99.55         | 99.75        | 99.54              | 99.18                |       |    |
| m/z       | m/z (Calc) | Diff (ppm) | Diff (mDa) | Height      | Height (Calc) | Height %     | Height % (Calc)    | Height Sum %         |       | He |
| 279.232   | 279.2319   | -0.38      | -0.1       | 77650.2     | 78426.3       | 100          | 100                | 80.9                 |       |    |
| 280.23... | 280.2353   | -1.01      | -0.3       | 15884.3     | 15607.7       | 20.5         | 19.9               | 16.5                 |       |    |
| 281.24    | 281.2382   | -6.31      | -1.8       | 2179.6      | 1792.8        | 2.8          | 2.3                | 2.3                  |       |    |
| 282.24... | 282.241    | -6.41      | -1.8       | 263.8       | 151.2         | 0.3          | 0.2                | 0.3                  |       |    |
| Species   | Io         | m/z        | Height     | Score (MFG) | Score (MS)    | Score (mass) | Score (iso. abund) | Score (iso. spacing) |       |    |
| (M+Na)+   |            | 301.214    | 2937.9     |             | 96.05         | 99.72        | 89.6               | 96.46                |       |    |

Table S10 – Crystal data and structure refinement for neosuberitenone A (1)

|                                                |                                                                |
|------------------------------------------------|----------------------------------------------------------------|
| Empirical formula                              | C <sub>27</sub> H <sub>40</sub> O <sub>4</sub>                 |
| Formula weight                                 | 428.59                                                         |
| Temperature/K                                  | 100.00                                                         |
| Crystal system                                 | monoclinic                                                     |
| Space group                                    | C2                                                             |
| a/Å                                            | 24.7343(6)                                                     |
| b/Å                                            | 6.27570(10)                                                    |
| c/Å                                            | 18.2166(4)                                                     |
| $\alpha/^\circ$                                | 90                                                             |
| $\beta/^\circ$                                 | 125.2637(7)                                                    |
| $\gamma/^\circ$                                | 90                                                             |
| Volume/Å <sup>3</sup>                          | 2308.80(9)                                                     |
| Z                                              | 4                                                              |
| $\rho_{\text{calc}}/\text{g}/\text{cm}^3$      | 1.233                                                          |
| $\mu/\text{mm}^{-1}$                           | 0.636                                                          |
| F(000)                                         | 936.0                                                          |
| Crystal size/mm <sup>3</sup>                   | 0.58 × 0.21 × 0.17                                             |
| Radiation                                      | CuK $\alpha$ ( $\lambda$ = 1.54178)                            |
| 2 $\Theta$ range for data collection/ $^\circ$ | 5.942 to 159.866                                               |
| Index ranges                                   | -31 ≤ h ≤ 31, -7 ≤ k ≤ 7, -22 ≤ l ≤ 22                         |
| Reflections collected                          | 21421                                                          |
| Independent reflections                        | 4852 [ $R_{\text{int}}$ = 0.0409, $R_{\text{sigma}}$ = 0.0334] |
| Data/restraints/parameters                     | 4852/1/290                                                     |
| Goodness-of-fit on $F^2$                       | 1.058                                                          |
| Final R indexes [ $I \geq 2\sigma(I)$ ]        | $R_1$ = 0.0330, $wR_2$ = 0.0879                                |
| Final R indexes [all data]                     | $R_1$ = 0.0332, $wR_2$ = 0.0881                                |
| Largest diff. peak/hole / e Å <sup>-3</sup>    | 0.24/-0.20                                                     |
| Flack parameter                                | 0.06(6)                                                        |

Table S11 – Crystal data and structure refinement for suberitenone E (2)

|                                                |                                                                |
|------------------------------------------------|----------------------------------------------------------------|
| Empirical formula                              | C <sub>27</sub> H <sub>40</sub> O <sub>5</sub>                 |
| Formula weight                                 | 444.59                                                         |
| Temperature/K                                  | 298.00                                                         |
| Crystal system                                 | monoclinic                                                     |
| Space group                                    | P2 <sub>1</sub>                                                |
| a/Å                                            | 6.7821(2)                                                      |
| b/Å                                            | 8.9780(3)                                                      |
| c/Å                                            | 20.5457(6)                                                     |
| $\alpha/^\circ$                                | 90                                                             |
| $\beta/^\circ$                                 | 95.5970(10)                                                    |
| $\gamma/^\circ$                                | 90                                                             |
| Volume/Å <sup>3</sup>                          | 1245.06(7)                                                     |
| Z                                              | 2                                                              |
| $\rho_{\text{calc}}/\text{g}/\text{cm}^3$      | 1.186                                                          |
| $\mu/\text{mm}^{-1}$                           | 0.638                                                          |
| F(000)                                         | 484.0                                                          |
| Crystal size/mm <sup>3</sup>                   | 0.4 × 0.16 × 0.07                                              |
| Radiation                                      | CuK $\alpha$ ( $\lambda$ = 1.54178)                            |
| 2 $\Theta$ range for data collection/ $^\circ$ | 8.648 to 158.82                                                |
| Index ranges                                   | -8 ≤ h ≤ 8, -9 ≤ k ≤ 10, -26 ≤ l ≤ 25                          |
| Reflections collected                          | 28530                                                          |
| Independent reflections                        | 5185 [ $R_{\text{int}}$ = 0.0572, $R_{\text{sigma}}$ = 0.0426] |
| Data/restraints/parameters                     | 5185/2/299                                                     |
| Goodness-of-fit on F <sup>2</sup>              | 1.079                                                          |
| Final R indexes [ $I \geq 2\sigma(I)$ ]        | $R_1$ = 0.0465, $wR_2$ = 0.1281                                |
| Final R indexes [all data]                     | $R_1$ = 0.0504, $wR_2$ = 0.1325                                |
| Largest diff. peak/hole / e Å <sup>-3</sup>    | 0.20/-0.20                                                     |
| Flack parameter                                | 0.04(11)                                                       |

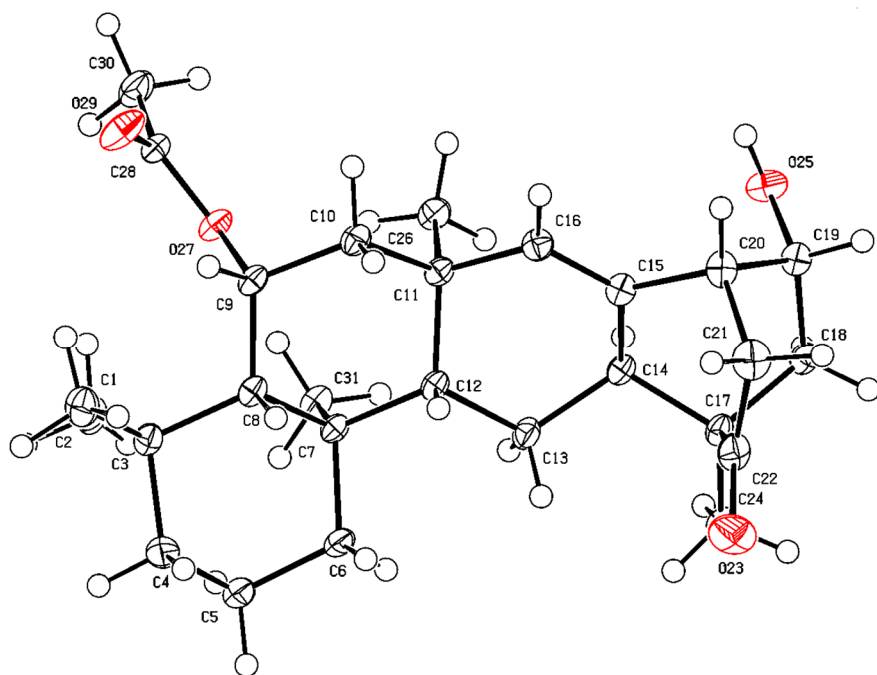

Figure.S59. Ellipsoid plot of neosuberitenone A (**1**). Anisotropic displacement parameters were drawn at 50% probability level.

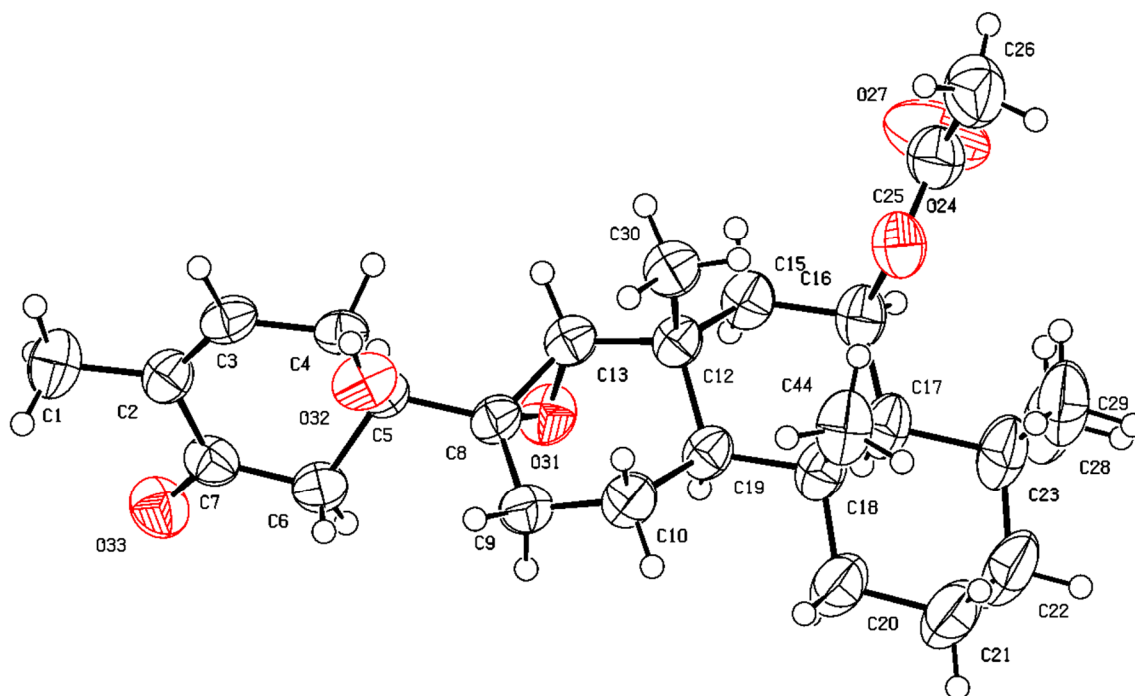

Figure.S60. Ellipsoid plot of suberitenone E (**2**). Anisotropic displacement parameters were drawn at 50% probability level.

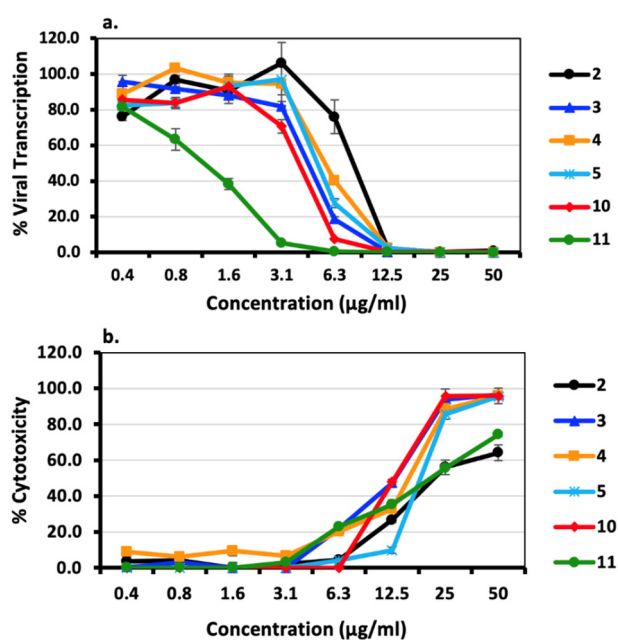

Figure S61. Antiviral activity and cytotoxicity of selected compounds. A549 Cells were infected with rA2-Rluc for 1h (a) or left uninfected (b) then treated in triplicate with serially diluted purified compounds. 24h post-infection, antiviral activity was determined by Renilla luciferase assay (a) and cytotoxicity was measured by MTT assay (b). Values are normalized to DMSO-treated cells. Shown are means  $\pm$  SEM.

Table S12. IC<sub>50</sub> values of isolated compounds against RSV.

| Compound                       | EC <sub>50</sub> (μM) |
|--------------------------------|-----------------------|
| Neosuberitenone A ( <b>1</b> ) | >50                   |
| Suberitenone E ( <b>2</b> )    | 20.5                  |
| Suberitenone F ( <b>3</b> )    | 9.8                   |
| Suberitenone G ( <b>4</b> )    | 11.0                  |
| Suberitenone H ( <b>5</b> )    | 10.9                  |
| Suberitenone A ( <b>9</b> )    | 7.9                   |
| Suberitenone B ( <b>10</b> )   | 3.5                   |
